# Supplementary material for: Application of Andersen’s behavioural model of health services use: a scoping review with a focus on qualitative health services research
Source: PubMed Central journal article supplement — BMJ Open. 2021 May 5;11(5):e045018. doi: 10.1136/bmjopen-2020-045018 (PMC8103375; doi:10.1136/bmjopen-2020-045018), 2021-05-05
Supplement: bmjopen-2020-045018.draft_revisions.pdf [file bmjopen-2020-045018.draft_revisions.pdf]

# BMJ Open

BMJ Open is committed to open peer review. As part of this commitment we make the peer review history of every article we publish publicly available.

When an article is published we post the peer reviewers' comments and the authors' responses online. We also post the versions of the paper that were used during peer review. These are the versions that the peer review comments apply to.

The versions of the paper that follow are the versions that were submitted during the peer review process. They are not the versions of record or the final published versions. They should not be cited or distributed as the published version of this manuscript.

BMJ Open is an open access journal and the full, final, typeset and author-corrected version of record of the manuscript is available on our site with no access controls, subscription charges or pay-per-view fees (<http://bmjopen.bmj.com>).

If you have any questions on BMJ Open's open peer review process please email [info.bmjopen@bmj.com](mailto:info.bmjopen@bmj.com)

# BMJ Open

## Application of Andersen's Behavioral Model of Health Services Use – A scoping review with a focus on qualitative health services research

|                               |                                                                                                                                                                                                                                                                   |
|-------------------------------|-------------------------------------------------------------------------------------------------------------------------------------------------------------------------------------------------------------------------------------------------------------------|
| Journal:                      | <i>BMJ Open</i>                                                                                                                                                                                                                                                   |
| Manuscript ID                 | bmjopen-2020-045018                                                                                                                                                                                                                                               |
| Article Type:                 | Original research                                                                                                                                                                                                                                                 |
| Date Submitted by the Author: | 23-Sep-2020                                                                                                                                                                                                                                                       |
| Complete List of Authors:     | Lederle, Mareike; Pädagogische Hochschule Freiburg, Public Health and Health Education<br>Tempes, Jana; Pädagogische Hochschule Freiburg, Public Health and Health Education<br>Bitzer, Eva; Pädagogische Hochschule Freiburg, Public Health and Health Education |
| Keywords:                     | Organisation of health services < HEALTH SERVICES ADMINISTRATION & MANAGEMENT, Quality in health care < HEALTH SERVICES ADMINISTRATION & MANAGEMENT, HEALTH SERVICES ADMINISTRATION & MANAGEMENT, PUBLIC HEALTH, QUALITATIVE RESEARCH                             |
|                               |                                                                                                                                                                                                                                                                   |

SCHOLARONE™  
Manuscripts

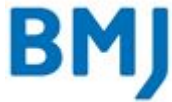

I, the Submitting Author has the right to grant and does grant on behalf of all authors of the Work (as defined in the below author licence), an exclusive licence and/or a non-exclusive licence for contributions from authors who are: i) UK Crown employees; ii) where BMJ has agreed a CC-BY licence shall apply, and/or iii) in accordance with the terms applicable for US Federal Government officers or employees acting as part of their official duties; on a worldwide, perpetual, irrevocable, royalty-free basis to BMJ Publishing Group Ltd ("BMJ") its licensees and where the relevant Journal is co-owned by BMJ to the co-owners of the Journal, to publish the Work in this journal and any other BMJ products and to exploit all rights, as set out in our [licence](#).

The Submitting Author accepts and understands that any supply made under these terms is made by BMJ to the Submitting Author unless you are acting as an employee on behalf of your employer or a postgraduate student of an affiliated institution which is paying any applicable article publishing charge ("APC") for Open Access articles. Where the Submitting Author wishes to make the Work available on an Open Access basis (and intends to pay the relevant APC), the terms of reuse of such Open Access shall be governed by a Creative Commons licence – details of these licences and which [Creative Commons](#) licence will apply to this Work are set out in our licence referred to above.

Other than as permitted in any relevant BMJ Author's Self Archiving Policies, I confirm this Work has not been accepted for publication elsewhere, is not being considered for publication elsewhere and does not duplicate material already published. I confirm all authors consent to publication of this Work and authorise the granting of this licence.

1  
2  
3 **Application of Andersen’s Behavioral Model of Health Services Use – A**  
4  
5 **scoping review with a focus on qualitative health services research**  
6  
7

8 Lederle, Mareike\*<sup>1</sup>; Tempes, Jana\*<sup>1</sup>; Bitzer, Eva-Maria <sup>1</sup>  
9

10  
11 \* shared first authorship

12  
13 <sup>1</sup> Department of Public Health and Health Education, University of Education Freiburg  
14  
15

16  
17  
18  
19 Corresponding Address:  
20

21 Mareike Lederle

22  
23 University of Education Freiburg  
24

25  
26 Kunzenweg 21  
27

28  
29 79117 Freiburg  
30

31  
32 Germany  
33

34  
35 mareike.lederle@ph-freiburg.de  
36

37  
38 +49 761 682-296  
39  
40  
41  
42  
43

44 **Keywords**

45  
46 Behavioral Model of Health Services Use, health services utilization, enabling factors, predisposing  
47 factors, need factors, scoping review, qualitative research  
48  
49

50 **Word Count: 4123**  
51  
52  
53  
54  
55  
56  
57  
58  
59  
60

## Abstract

Introduction: Qualitative methods have become integral in health services research, and Andersen's Behavioral Model of Health Services Use (BMHSU) is one of the most commonly employed models of health service utilization. The model focuses on three core factors to explain health care utilization: predisposing factors, enabling factors, and need factors. A recent overview of application of the BMHSU is lacking, particularly in terms of its application in qualitative research. Therefore, we provide an overview of the application of the BMHSU in health services research and describe the (un)suitability of the model in qualitative research.

Methods: We searched five databases from March to April 2019, and in April 2020. For inclusion, each study had to focus on individuals  $\geq 18$  years of age and the studies must have explicitly cited the BMHSU, a modified version of the model, or the three core factors that constitute the model, regardless of study design, or publication type. We used MS Excel® to perform descriptive statistics, and applied MAXQDA 2020® as part of a qualitative content analysis.

Results: From a total of 6,319 results, we identified 1,879 publications dealing with the BMHSU. The main methodological approach was quantitative (89%). Two-thirds of all papers were published since 2010. In studies employing a qualitative design, the BMHSU was applied to justify the theoretical background (62%), structure the data collection (40%), and perform data coding (78%). Various publications highlight the usefulness of the BMHSU for qualitative data, while others criticize the model for several reasons (e.g., it lacks cultural or psychosocial factors).

Conclusions: The application of different – and older – models of health care utilization make it difficult to compare studies in health services research. Future research should consider studies of quantitative or qualitative study designs and account for the most current and comprehensive model of the BMHSU.

## Article summary

### Strengths and limitations of the study:

- This scoping review is the first which provides an exploration of the application widely adopted Behavioral Model of Health Services Use.
- This paper provides the first-ever overview of the (un)suitability of the Behavioral Model of Health Services Use in qualitative research.
- This paper strengthens the perception of qualitative research by considering the application of a theoretical model in qualitative research.
- The insights into the application of the Behavioral Model of Health Services Use is limited by focusing on qualitative research.

### Introduction

Health care utilization refers to the use of the health care system “by persons for the purpose of preventing and curing health problems, promoting maintenance of health and well-being, or obtaining information about one’s health status and prognosis” [1]. A needs-based health care system meets the needs of a person objectively identified by (health) professionals and considers the demands of an individual. If this interaction is successful, overuse, underuse, and misuse of health care systems can be avoided. Otherwise, there is the possibility of compromising the health of an individual and placing burden on the health care system [2]. To avoid overuse, underuse, and misuse of the health care system, it is important to consider the (non-)use of health care services, which is determined by a variety of contextual and individual factors [3]. As a measurable construct, health care service utilization is primarily determined through quantitative surveys. To explore individual demands, qualitative methods can provide important and rich information within the field of health services research [4, 5]. Various models have been developed across a variety of disciplines to explore and predict individuals'

1 intentions and behaviors as they utilize health care services [6]. In health services research, the  
2 Behavioral Model of Health Services Use (BMHSU) is the most frequently cited model of  
3  
4 Behavioral Model of Health Services Use (BMHSU) is the most frequently cited model of  
5  
6 health care service utilization [6]. The model was developed by R.M. Andersen in 1968, and  
7  
8 was based on a national quantitative survey that aimed to understand families' use of health  
9  
10 services [7, 8]. The model focuses on three core factors to explain health care utilization:  
11  
12 predisposing factors (e.g., age, education), enabling factors (e.g., income, hospital density), and  
13  
14 need factors (e.g., health status) [8].  
15  
16

17  
18 In recent years, Andersen's initial behavioral model has undergone continuous development,  
19  
20 where new focus was placed on various factors [8–10], such as 'consumer satisfaction' in the  
21  
22 1970s [11, 12], and 'health status', 'personal health practice', and 'external environment' in the  
23  
24 1980s [9, 13]. In 1995, Andersen himself reviewed the model and its development and has since  
25  
26 included feedback loops to consider how treatment outcomes affect health behavior [8].  
27  
28 Additional 'contextual and individual characteristics' were added to the model in the 2000s [8].  
29  
30 Some of these further developments were carried out in cooperation with other authors, e.g.,  
31  
32 Andersen and Newman's Framework of Viewing Health Services Utilization [11] or Aday and  
33  
34 Andersen's Framework for the Study of Access to Medical Care [12]. The BMHSU was  
35  
36 modified for specific settings (e.g., complementary and alternative medicine [14]) and for  
37  
38 specific target groups (e.g., the Behavioral Model for Vulnerable Populations for homeless  
39  
40 people [15]). Currently, many versions of the model for different settings or target groups are  
41  
42 available and applied in health services research. The most current and comprehensive model  
43  
44 is the 2013 BMHSU [16] (Figure 1). The main focus of that model is on the factors that facilitate  
45  
46 or impede an individual's access to health care services. According to the model, access is  
47  
48 determined by contextual characteristics, individual characteristics, health behaviors, and  
49  
50 outcomes. Contextual characteristics include circumstances and the environment; individual  
51  
52 characteristics are determined by a person's life circumstances including, for example, genetics  
53  
54  
55  
56  
57  
58  
59  
60

1  
2 and socialization; health behaviors are an individual's personal practices; and outcomes are  
3  
4 reflected by an individual's health status and consumer satisfaction.  
5

6  
7 [Figure 1 about here]  
8  
9

10 The application of the BMHSU and its different versions has already been examined in several  
11  
12 systematic reviews. These are, for example, reviews focusing on specific diseases [17] or  
13  
14 settings [18]. The most recent systematic review has examined the application of the BMHSU  
15  
16 in general health care, but excludes specific care settings (e.g., maternal health), specific target  
17  
18 groups (e.g., veterans), and studies that focus on specific diseases (e.g., HIV) [3]. All of these  
19  
20 reviews have only considered quantitative studies and have excluded qualitative studies,  
21  
22 although qualitative methods have become an important and integral part of health services  
23  
24 research, and are useful for recording detailed descriptions and complex issues in the context  
25  
26 of health care utilization and health care services [4, 5]. Even though the BMHSU is the most  
27  
28 frequently cited model of access to health care services [6], an overview of the development  
29  
30 and application of the BMSHU over the last 50 years is lacking, especially in terms of its  
31  
32 application in qualitative research.  
33  
34  
35  
36

37  
38 The main objective of this review is to provide a qualitative synthesis of qualitative studies that  
39  
40 applied the BMHSU. We consider the strengths and limitations described by the study authors  
41  
42 and explore whether the BMHSU – a model developed through quantitative data [7] – is useful  
43  
44 for qualitative research (qualitative synthesis).  
45  
46

47  
48 To be able to illustrate the balance between qualitative studies applying the BMHSU and studies  
49  
50 employing another methodological design, we identify how the BMHSU is applied in health  
51  
52 service research in general, regardless of the methodological approach used (quantitative  
53  
54 overview).  
55  
56  
57  
58  
59  
60



## Methods

This scoping review follows the PRISMA Extension for scoping reviews (PRISMA-ScR) [19]. It exists no review protocol. For study selection, two researchers (ML, JT) independently screened all selected titles and abstracts for relevance; to extract data from original studies, two researchers (ML, JT) independently extracted half of the studies and the other researcher assessed the data extraction for accuracy. For the qualitative data analysis, two researchers (ML, JT) coded the material together. Discrepancies were discussed and resolved by a team of reviewers (ML, JT, EMB).

### Patient and public involvement

No patient involved.

### Search strategy

We conducted a systematic literature search in March and April 2019, and performed an updated search in April 2020 using the Embase® via Ovid, Medline® via PubMed, CINAHL® and PsycInfo® via EBSCOhost, and Social Science Citation Index® via Web of Science databases. The search strategy combined MeSH-Terms and keywords pertaining to the BMHSU and its three core factors. The detailed search strategy for one database is identified in the supplementary material (additional file 2). The search was conducted for publications published from 1968 to April 2020. Study selection, extraction, and data analysis were each carried out in two steps, following the research questions. The study selection process is shown in the flow diagram (Figure 2).

### Quantitative overview

#### *Study selection*

As an initial first step, title-abstract-screening was performed for all search results. We included all publications focused on adult populations that applied either the BMHSU, a modified version of the model, or all three core factors of the model. No limitations were set for language,

1  
2 study design, or publication type. Studies were excluded if they could not be obtained via  
3  
4 electronic access, interlibrary loan, or through contact with the authors.  
5

### 6 7 *Data extraction*

8  
9 The following characteristics were extracted from the title and abstract of each included study:  
10  
11 publication year, first author, country, methodological approach, target group, care setting, and  
12  
13 the applied version of the BMHSU. For abstracts with insufficient information regarding our  
14  
15 extraction characteristics, we obtained the full-text version of the publications.  
16  
17

### 18 19 *Data analysis*

20  
21 We calculated descriptive statistics with MS Excel® for the overview.  
22  
23

## 24 **Qualitative synthesis**

### 25 26 *Study selection*

27  
28 For the qualitative synthesis, the full-text articles of studies with qualitative or mixed-method  
29  
30 approaches were screened for their eligibility criteria (i.e., whether they applied the BMHSU in  
31  
32 qualitative research). If the publications did not have the full-text article in either English or  
33  
34 German, we excluded the studies. We excluded study protocols and conference papers, but  
35  
36 searched for corresponding full texts and included them if applicable.  
37  
38

### 39 40 *Quality appraisal*

41  
42 The quality of publications adopting a qualitative design was assessed using the “Critical  
43  
44 Appraisal Checklist for Qualitative Research” [20]. The checklist contains ten items that assess  
45  
46 the methodological quality of the design, data collection, and data analysis of the publications.  
47  
48 The tool comprises four answer choices: ‘Yes’, ‘No’, ‘Unclear’, and ‘Not Applicable’. If there  
49  
50 was insufficient information to answer a given question, the response was recorded as  
51  
52 ‘Unclear’.  
53  
54  
55  
56  
57  
58  
59  
60

## *Data analysis*

For the qualitative synthesis, MAXQDA 2020® software was used [21]. To answer the research questions, the following deductive codes were coded in the data material: applied version of the BMHSU, the way in which the model is applied in qualitative studies, the potential for and limitations of the BMHSU, and the extensions of the BMHSU described by the authors. In addition, we considered which of the BMHSU factors were examined and which were complemented by inductive factors that emerged from the data material. We distinguished between the three core factors (predisposing factors, enabling factors, and need factors) and the associated factors (e.g., demographics, health policy, and perceived need). We recoded all documents with the final coding frame. In the context of the content-structuring qualitative analysis, the summarizing reduction of the coding followed the approach detailed by other researchers [22]. The presented results are structured based on these main categories.

## **Results**

### **Quantitative overview of the use of the BMHSU in health services research**

We identified a total of 12,493 records. After deleting duplicates, a total of 6,319 records remained (Figure 2). After screening the titles and abstracts, it was found that 1,879 records either applied the BMHSU, the three core factors of the model, or a modified version of the model.

[Figure 2 about here]

Starting with the initial use of the model in 1973, reception toward the model has increased considerably in recent decades (Table 1). Two-thirds of all related papers were published in the last 10 years (i.e., since 2010), and more than 50% of the publications have been published since 2013. Further, 70% of the publications are from the USA or Canada, followed by Asia (13%) and Europe (9%). The majority are quantitative studies (n=1,680; 89%), while 4% of all records are qualitative studies (n=69) and 3% are reviews (n=61). In all, 30 publications are

1  
2 mixed-methods studies (2%) and 39 publications (2%) are theoretical reflections without  
3  
4 empirical data. General health care is the most studied care setting (n=397, n=21%), followed  
5  
6 by nursing care (13%, n=237) and mental health services (12%, n=222). About one quarter of  
7  
8 all studies deals with individuals aged  $\geq 50$  years (n=481). In addition, 17% of the publications  
9  
10 focus on migrants (n=322), and 14% on women (n=256) and the general population (n=255).  
11  
12 Half of the publications (n=936) do not account for a specific disease; for 12% (n=229) of all  
13  
14 publications, mental disorders represent the most frequently examined diseases of interest.  
15  
16  
17

18 Table 1: Quantitative description of publications using the Behavioral Model of Health Services Use in health services research  
19

|                                | <b>Quantitative overview</b><br>(n=1,879)<br><i>(based on title &amp; abstract)</i> | <b>Qualitative synthesis</b><br>(n=77)<br><i>(based on full text version)</i> |
|--------------------------------|-------------------------------------------------------------------------------------|-------------------------------------------------------------------------------|
|                                | <b>n (%)*</b>                                                                       | <b>n (%)*</b>                                                                 |
| <b>Year</b>                    |                                                                                     |                                                                               |
| 1968-1979                      | 9 (0)                                                                               | 0 (0)                                                                         |
| 1980-1989                      | 38 (2)                                                                              | 0 (0)                                                                         |
| 1990-1999                      | 168 (9)                                                                             | 0 (0)                                                                         |
| 2000-2009                      | 440 (23)                                                                            | 7 (9)                                                                         |
| 2010-2019                      | 1,224 (65)                                                                          | 70 (91)                                                                       |
| <b>Region</b>                  |                                                                                     |                                                                               |
| North-America                  | <b>1,275 (70)<sup>1</sup></b>                                                       | <b>43 (56)</b>                                                                |
| Asia                           | <b>244 (13)</b>                                                                     | 6 (8)                                                                         |
| Europe                         | <b>163 (9)</b>                                                                      | <b>14 (18)</b>                                                                |
| Africa                         | 68 (4)                                                                              | <b>12 (16)</b>                                                                |
| South America                  | 49 (3)                                                                              | 2 (3)                                                                         |
| Oceania                        | 29 (2)                                                                              | 5 (6)                                                                         |
| <b>Methodological approach</b> |                                                                                     |                                                                               |
| Quantitative                   | <b>1,680 (89)</b>                                                                   | /                                                                             |
| Qualitative                    | <b>69 (4)</b>                                                                       | 58 (75)                                                                       |
| Review                         | <b>61 (3)</b>                                                                       | /                                                                             |
| Theoretical                    | 39 (2)                                                                              | /                                                                             |
| Mixed-Method                   | 30 (2)                                                                              | 19 (25)                                                                       |
| <b>Care Setting</b>            |                                                                                     |                                                                               |
| General health care            | <b>397 (21)</b>                                                                     | <b>12 (16)</b>                                                                |
| Nursing care <sup>2</sup>      | <b>237 (13)</b>                                                                     | 5 (6)                                                                         |
| Mental health services         | <b>222 (12)</b>                                                                     | 6 (8)                                                                         |
| Screening                      | 107 (6)                                                                             | <b>7 (9)</b>                                                                  |
| Perinatal care <sup>3</sup>    | 77 (4)                                                                              | <b>7 (9)</b>                                                                  |
| HIV services                   | 35 (2)                                                                              | 6 (8)                                                                         |
| <b>Target group</b>            |                                                                                     |                                                                               |
| Individuals $\geq 50$ years    | <b>481 (26)</b>                                                                     | <b>11 (14)</b>                                                                |
| Migrants                       | <b>322 (17)</b>                                                                     | <b>23 (30)</b>                                                                |
| Women                          | <b>256 (14)</b>                                                                     | <b>16 (21)</b>                                                                |
| General population             | <b>255 (14)</b>                                                                     | 3 (3)                                                                         |
| Men                            | 203 (11)                                                                            | 9 (12)                                                                        |
| <b>Disease of interest</b>     |                                                                                     |                                                                               |
| No specific disease            | <b>936 (50)</b>                                                                     | <b>27 (35)</b>                                                                |
| Mental disorders               | <b>229 (12)</b>                                                                     | 7 (9)                                                                         |
| Cancer                         | <b>134 (7)</b>                                                                      | <b>9 (12)</b>                                                                 |
| HIV                            | 96 (5)                                                                              | <b>11 (14)</b>                                                                |

20  
21  
22  
23  
24  
25  
26  
27  
28  
29  
30  
31  
32  
33  
34  
35  
36  
37  
38  
39  
40  
41  
42  
43  
44  
45  
46  
47  
48  
49  
50  
51  
52  
53  
54  
55  
56  
57  
58  
59  
60  
<sup>1</sup> The ones in bold are the three most frequent

<sup>2</sup> Nursing consist of homecare, long-term care, formal care, care facility, informal care, respite care, institutionalized care & transportation services

<sup>3</sup> Perinatal care also includes midwifery services

\* Since some publications included multiple care settings, target groups etc. the sum is greater than 100%

## **Qualitative synthesis of the use of the BMHSU in qualitative health services research**

After excluding studies without a qualitative or mixed-methods approach (n=1,780), those without a full text available (n=10), those without a corresponding full text to a conference paper (n=7), and those that were not at all related to the BMHSU (n=5), a total of 77 studies remained and were included in the qualitative synthesis of qualitative studies applying the BMHSU (see Figure 2).

Although the first known application of the BMHSU in a qualitative study was from 2002, most of the qualitative records were identified in 2010 and later (91%; n=70; Table 1). Most publications are from the USA and Canada (n=43, 56%), 18% (n=14) are from Europe and 16% (n=12) are from Africa. General health care is the care setting that was explored most often in publications adopting a qualitative study design (n=12, 16%), followed by screening and perinatal care (n=7 each, 9%). Qualitative research applying the BMHSU primarily targets migrants (n=23, 30%), women (n=16, 21%), and individuals aged  $\geq 50$  years (n=11, 14%). Further, 35% of qualitative publications (n=27) address no specific disease; if a particular disease was of interest, it is most often HIV (n=11, 14%) or cancer (n=9, 12%).

Two-thirds of the qualitative studies use personal interviews as a data collection method (n=51, 81%). The sample size varies between five and 470 participants. Most of the qualitative studies interview the target group directly (n=65, 84%). Health professionals and/or next of kin assessments are the sole source of information in 12 studies (16%). In addition, 18 of the 65 qualitative studies that approached the target group obtained further information from health professionals (n=13), next of kin (n=1), or both (n=4; for further details, see additional file 3).

## **Application of the different versions of the Andersen model**

The BMHSU is applied in the various studies to justify the theoretical background (62%), structure the data collection (40%) (such as aiding in the development of the interview guide),

1  
2 and for data coding (78%). More than half of the studies (n=42) [23–62] are based on the  
3  
4 BMHSU from 1995 [9]. Multiple studies (n=11) use the Behavioral Model for Vulnerable  
5  
6 Populations [63–72]. Twelve studies [31, 42, 55, 61, 73–80] employ Andersen and Newman’s  
7  
8 Framework of Viewing Health Services Utilization, eight studies [42, 43, 81–86] apply Aday  
9  
10 and Andersen’s Framework for the Study of Access to Medical Care, and seven studies [42, 48,  
11  
12 52, 55, 59, 61, 87] are based on the original Behavioral Model of Families’ Use of Health  
13  
14 Services from 1968. Individual studies use other models, such as the expanded model from  
15  
16 Bradley et al. [29] (additional file 3).  
17  
18  
19  
20

### 21 **(Un)Suitability of the Andersen model from the authors’ perspective**

22 Overall, 29 publications [23, 31–33, 35, 36, 40, 42, 43, 45, 46, 48, 49, 51, 53, 55, 56, 69, 72,  
23  
24 73, 78–80, 83, 88–92] described that the model was useful in their work, e.g., to obtain and  
25  
26 evaluate qualitative data. Of these, 17 publications [35, 36, 40, 43, 45, 46, 49, 51, 53, 73, 78–  
27  
28 80, 83, 88, 89, 92] highlight the general usefulness of the BMSHU for qualitative data:  
29  
30 “Andersen’s framework provides a valid, consistent, and unbiased manner in which to code and  
31  
32 classify qualitative data” [89]. Various publications [35, 40, 43, 45, 46, 49, 51, 53, 55, 58, 73,  
33  
34 78–80, 88, 89, 93] describe how their data can be applied very well to the BMHSU and its  
35  
36 factors. Others described that the strength of the model lies in its consideration of both patient-  
37  
38 related and environmental factors [40, 51, 91], and that the model allows for “a more transparent  
39  
40 comparison with findings emerging from other studies” [88].  
41  
42  
43  
44  
45

46 Some studies describe the usefulness of the BMHSU and additionally critique some parts of the  
47  
48 model [23, 32, 36, 40, 49, 53, 55, 90, 92–94]. For instance, there are authors who criticize the  
49  
50 model, but do not propose changes to its structure [23, 26, 36, 49, 90, 92–94]. Some studies  
51  
52 [23, 26] describe that cultural factors are not adequately represented in the model: “the model  
53  
54 has been noted not to be sensitive to the diverse cultural and structural barriers in healthcare  
55  
56 among minority groups” [26]. According to the authors of some publications [36, 49], the  
57  
58 models would need to further elaborate upon the relationship between the three core factors of  
59  
60

1  
2 the BMHSU and the relevance of each. Other authors claim that the model does not cover all  
3  
4 factors of health care utilization, such as psychosocial factors [23], and would be less suitable  
5  
6 for studies on HIV [90] or health care coverage [94].  
7  
8

9 Not all critics proposed model modifications, but some of the identified limitations may lead to  
10  
11 modifications of or additions to the BMHSU. Based on their findings, some authors identified  
12  
13 additional factors not covered by the model that impact health care utilization [24, 29, 32, 37,  
14  
15 38, 40, 55, 58, 75, 81, 86, 91], such as health literacy [40, 55, 91], or competing priorities [24,  
16  
17 40] (Table 2). The basic structure of the BMHSU is retained as part of these expansions.  
18  
19

20  
21 Other studies fundamentally change the original structure of the BMHSU, both in terms of the  
22  
23 factors [25, 39, 75] and the feedback loops provided [40, 53, 63], ultimately impacting the  
24  
25 influence between each of the factors in the model. Some studies emphasize the distinction  
26  
27 between the three core factors as predisposing and inhibiting factors, and as enabling and  
28  
29 impeding factors [25, 27, 63], while others combine the model with another model [62].  
30  
31  
32  
33  
34  
35  
36  
37  
38  
39  
40  
41  
42  
43  
44  
45  
46  
47  
48  
49  
50  
51  
52  
53  
54  
55  
56  
57  
58  
59  
60

Table 2: Additions to the Behavioral Model of Health Services Use from qualitative health services research

| Contextual characteristics           | Individual characteristics                                                                                               |                                                                 |                 | Health Behaviors                                                                                           | Outcome                                      | Further additions              |                                                    |
|--------------------------------------|--------------------------------------------------------------------------------------------------------------------------|-----------------------------------------------------------------|-----------------|------------------------------------------------------------------------------------------------------------|----------------------------------------------|--------------------------------|----------------------------------------------------|
|                                      | Predisposing factors                                                                                                     | Enabling factors                                                | Need factors    |                                                                                                            |                                              |                                |                                                    |
| Intake & engagement [37]             | Competing priorities [24, 40]                                                                                            | Medication characteristics [40]                                 | Unmet need [32] | Distinction between problem recognition, decision to seek help and decision to use health care system [75] | Dental service use & dental experiences [58] | Psychosocial factors [29]      |                                                    |
| Patient & transition [37]            | Fear [24]                                                                                                                | Reminder strategies [40]                                        |                 |                                                                                                            |                                              |                                |                                                    |
| Medication adherence strategies [37] | (Mis)trust [24, 91]                                                                                                      | Personal emergency alarm system [32]                            |                 |                                                                                                            |                                              |                                |                                                    |
| Billing [37]                         | Previous experiences [24, 91]                                                                                            | Informal care system [32]                                       |                 | Mental health [86]                                                                                         | Avoidant strategies [55]                     | Intended & actual use [29, 58] | Situation and satisfaction of the next of kin [81] |
| Specific program for support [37]    | Contingency plans for future falls [32]                                                                                  | Characteristics at the level of informal caregivers [38]:       |                 |                                                                                                            |                                              |                                |                                                    |
| Health Literacy [37]                 | Health literacy [40, 55, 91]                                                                                             | Physician referral, knowledge about the services, acculturation |                 | Spirituality [55]                                                                                          | Service experience [58]                      | Vulnerability factors [72]     |                                                    |
| Individualized care [37]             | Characteristics at the level of informal caregivers [38]: Familism, perception about services, religiosity, gender roles |                                                                 |                 |                                                                                                            |                                              |                                |                                                    |
| Philosophical approaches [37]        |                                                                                                                          |                                                                 |                 |                                                                                                            |                                              |                                |                                                    |
| Pharmacy services [40]               |                                                                                                                          |                                                                 |                 |                                                                                                            |                                              |                                |                                                    |
| Rheumatologist [91]                  | Conscientiousness [91]                                                                                                   |                                                                 |                 |                                                                                                            |                                              |                                |                                                    |

The table shows the variables as the authors of the original studies assigned them to BMHSU core factors



## Factors of the BMHSU emerging from qualitative health services research

Individual characteristics are considered much more frequently than contextual characteristics, health behaviors, or health outcomes in publications that adopt a qualitative design. Table 3 lists all factors of the BMHSU with the number of publications that used each factor. Although the qualitative studies explored in our research consider a wide range of factors, there are still some other factors of the BMHSU that have not been considered in any of the included publications that featured a qualitative study design (e.g., quality of life as an outcome factor or some predisposing factors as contextual characteristics).

**Contextual characteristics:** A total of 63 qualitative studies (82%) mention contextual characteristics, of which enabling factors are most frequently included, such as health professional factors (n=22, 29%) – e.g., soft skills or availability (n=21, 27%).

**Individual characteristics:** The most frequently researched factors pertain to individual characteristics, especially predisposing factors such as social network (n=41, 53%), attitude towards health care services (n=33, 43%), and values (n=28, 36%). Nearly half of all studies consider accessibility of health care services as an enabling factor (n=34, 44%). The most common need factor is perceived symptoms (n=45, 58%).

**Health Behavior:** In terms of health behavior, the relationship between the patient and provider (n=21, 27%), as well as alternative medicine (n=13, 17%) and self-care (n=11, 14%) were most often analyzed in publications adopting a qualitative design.

**Outcomes:** Overall, about half of the qualitative studies (n=37) mention health outcomes in their analyses. Satisfaction with providers (n=18, 23%) and prior experience (n=17, 22%) are the most considered aspects.

During our qualitative syntheses of qualitative health services research studies, health literacy emerged as a inductive category, separated into individual [95] and organizational health literacy [96]. We identified associations with organizational health literacy in 25 studies (32%)

and individual health literacy in 52 studies (68%; Table 3). In the context of organizational health literacy, the focus is on access to health information: “share health risk information while empowering patients to make their own health decisions” [37]. The most frequently mentioned factors among individual health literacy are knowledge (n=39, 51%) and competences (n=22, 29%), as exemplified by the following statement: “knowledge was empowering to make own choices and feel in control of their care decisions” [28].

Table 3: Factors examined in publications

|                            | Factors                                | N            | References                                                                                                             |
|----------------------------|----------------------------------------|--------------|------------------------------------------------------------------------------------------------------------------------|
| Contextual characteristics | <b>Predisposing factors</b>            |              |                                                                                                                        |
|                            | Demographic                            | 1            | [92]                                                                                                                   |
|                            | Social                                 | /            | /                                                                                                                      |
|                            | Beliefs                                |              |                                                                                                                        |
|                            | Stigma*                                | 14           | [34, 45, 46, 53, 61, 65, 67, 72, 78, 85, 86, 89, 90, 97]                                                               |
|                            | Culture*                               | 5            | [24, 41, 45, 47, 78]                                                                                                   |
|                            | Social norms*                          | 5            | [35, 41, 77, 78, 88]                                                                                                   |
|                            | Gender roles*                          | 3            | [28, 67, 97]                                                                                                           |
|                            | <b>Enabling factors</b>                |              |                                                                                                                        |
|                            | Health Policy                          | 7            | [43, 58, 62, 84, 85, 92, 98]                                                                                           |
|                            | Financing                              | 12           | [35, 37, 42, 51, 62, 65, 84, 89, 91, 92, 99, 100]                                                                      |
|                            | Organization                           |              |                                                                                                                        |
|                            | Health professional factors*           | 22           | [25, 32, 35, 37, 40, 43, 44, 51, 54, 59, 62, 70, 80, 82, 83, 85, 89, 91–93, 98, 101]                                   |
|                            | Availability*                          | 21           | [24, 25, 29, 34, 40, 42, 43, 48, 51, 54, 60, 62, 65, 75, 81, 88, 91, 93, 98, 100, 102]                                 |
|                            | Additional health care services*       | 12           | [27, 37, 53, 73, 76, 77, 81, 82, 89, 91, 98, 101]                                                                      |
|                            | Cultural/linguistic suitable services* | 9            | [24, 32, 38, 41, 63, 67, 72, 85, 86]                                                                                   |
|                            | Cooperation*                           | 5            | [24, 78, 81, 82, 98]                                                                                                   |
|                            | System complexity*                     | 6            | [35, 65, 81, 83, 85, 102]                                                                                              |
|                            | Quality of care*                       | 6            | [27, 35, 43, 60, 81, 91]                                                                                               |
|                            | Interpreters*                          | 2            | [24, 70]                                                                                                               |
| <b>Need factors</b>        |                                        |              |                                                                                                                        |
| Environmental              | 3                                      | [51, 90, 92] |                                                                                                                        |
| Population health indices  | /                                      | /            |                                                                                                                        |
| Individual characteristics | <b>Predisposing factors</b>            |              |                                                                                                                        |
|                            | Demographic                            |              |                                                                                                                        |
|                            | Immigration status*                    | 7            | [32, 54, 57, 58, 71, 72, 102]                                                                                          |
|                            | Gender                                 | 2            | [63, 65]                                                                                                               |
|                            | Age                                    | 13           | [25, 26, 45, 51, 54, 58, 59, 62, 63, 79, 80, 94, 102]                                                                  |
|                            | Genetic                                | 2            | [47, 98]                                                                                                               |
|                            | Social                                 |              |                                                                                                                        |
|                            | Social network                         | 41           | [26, 27, 29–32, 34, 36, 40–43, 48–51, 55, 57–59, 61, 63, 65, 67, 68, 76, 78–83, 85, 86, 88, 90, 93, 94, 100, 102, 103] |
|                            | Personal skills*                       | 16           | [27, 30, 40, 44, 46, 52, 66–68, 70–72, 76, 78, 82, 86]                                                                 |
|                            | Competing priorities*                  | 12           | [23–25, 31, 35, 40, 51, 67, 78, 82, 88, 94]                                                                            |
|                            | Living conditions*                     | 10           | [40, 42, 48, 50, 66, 67, 71, 81, 89, 90]                                                                               |
|                            | Education*                             | 5            | [48, 58, 62, 88, 91]                                                                                                   |
|                            | Beliefs                                |              |                                                                                                                        |
|                            | Attitude towards health care services  | 33           | [24, 27–30, 32, 35, 41–43, 46, 48–51, 53, 60, 62, 64, 75, 78–81, 86, 88, 89, 91, 93, 99, 100, 102, 103]                |
|                            | Fear*                                  | 27           | [23–25, 35, 36, 40, 41, 47, 50, 51, 53, 57, 61–63, 65, 68, 71, 75, 77–79, 85, 88, 89, 101, 102]                        |
|                            | Values                                 | 28           | [24, 26, 27, 30, 32, 34, 35, 41, 47, 49, 54, 55, 57, 58, 61, 63, 67, 68, 71, 72, 75, 82, 85, 87, 88, 93, 100, 103]     |

|  |                                        |    |                                                                                                                           |
|--|----------------------------------------|----|---------------------------------------------------------------------------------------------------------------------------|
|  | Attitude towards health professionals  | 12 | [28, 33, 38, 44, 46, 48, 49, 61, 77, 88, 99, 102]                                                                         |
|  | <b>Enabling factors</b>                |    |                                                                                                                           |
|  | Financing                              |    |                                                                                                                           |
|  | Financial resources                    | 25 | [23, 26, 29, 42, 43, 49–54, 58, 63, 66, 68, 71, 72, 78, 79, 88, 91, 94, 99, 100]                                          |
|  | Insurance                              | 18 | [23, 30, 35, 40, 44, 46, 52, 54, 64, 65, 71, 72, 88, 91, 93, 94, 102, 103]                                                |
|  | Income                                 | 8  | [29, 30, 54, 65, 71, 88, 93, 103]                                                                                         |
|  | Organization                           |    |                                                                                                                           |
|  | Accessibility*                         | 34 | [23–26, 30, 35, 40, 42, 43, 45, 48, 49, 51, 53, 58, 62, 65, 66, 72, 75, 78, 79, 82, 83, 88–91, 93, 99–103]                |
|  | Stable routine*                        | 6  | [65, 75, 76, 89, 90, 100]                                                                                                 |
|  | Reminder strategies*                   | 3  | [40, 51, 53]                                                                                                              |
|  | <b>Social Support</b>                  |    |                                                                                                                           |
|  | General*                               | 12 | [48, 49, 51, 64, 67, 76, 78, 80, 83, 88, 90, 100]                                                                         |
|  | Tangible                               | 18 | [27, 32, 34, 40, 42, 50, 51, 65, 67, 76, 79, 81, 87, 91, 93, 94, 102, 103]                                                |
|  | Emotional/affectionate                 | 15 | [23, 25, 26, 30, 36, 50, 51, 55, 63, 65, 67, 76, 78, 81, 83]                                                              |
|  | Informational                          | 11 | [23, 26, 41, 43, 68, 76, 79, 82, 87, 90, 93, 100, 103]                                                                    |
|  | <b>Need factors</b>                    |    |                                                                                                                           |
|  | Perceived                              |    |                                                                                                                           |
|  | General*                               | 10 | [31, 32, 34, 59, 65, 74, 79, 87, 93, 103]                                                                                 |
|  | Symptoms                               | 45 | [23–27, 31, 36, 40, 42–44, 47–51, 54, 55, 58–61, 63, 65, 67, 68, 71, 75, 76, 78, 79, 81, 86, 88, 91, 94, 97, 99–101, 103] |
|  | Evaluated                              | 20 | [26, 31, 34, 36, 42, 56, 59, 60, 63, 76, 79–81, 83, 86, 91–93, 100, 103]                                                  |
|  | <b>Health Behaviors</b>                |    |                                                                                                                           |
|  | Personal health practice               |    |                                                                                                                           |
|  | Alternative medicine*                  | 13 | [26, 30, 45, 54, 55, 58, 65, 78, 79, 87, 88, 91, 99]                                                                      |
|  | Self-care                              | 11 | [25, 30, 47, 49, 65, 75, 87, 88, 90, 99, 100]                                                                             |
|  | Adherence                              | 8  | [37, 40, 51, 64, 66, 91, 100, 102]                                                                                        |
|  | Diet                                   | 4  | [48, 49, 65, 87]                                                                                                          |
|  | Process of medical care                |    |                                                                                                                           |
|  | Relationship patient-provider          | 21 | [24, 27, 28, 40, 51, 53, 61, 67, 68, 71, 73, 75, 76, 78, 83, 85, 89–92, 100]                                              |
|  | Second medical opinion*                | 1  | [51]                                                                                                                      |
|  | Use of personal health services        | 77 | [23–55, 57–68, 70–94, 97–103]                                                                                             |
|  | <b>Outcomes</b>                        |    |                                                                                                                           |
|  | Perceived health status                | 5  | [42, 49, 78, 91, 92]                                                                                                      |
|  | Evaluated health status                | 1  | [65]                                                                                                                      |
|  | Consumer satisfaction                  |    |                                                                                                                           |
|  | General*                               | 2  | [83, 92]                                                                                                                  |
|  | Prior experiences*                     | 17 | [23, 24, 26, 28, 46, 48, 52, 56, 58, 68, 72, 75, 81, 83, 97, 99, 100]                                                     |
|  | Waiting time                           | 5  | [23, 43, 46, 83, 88]                                                                                                      |
|  | Satisfaction with providers*           | 18 | [23, 27, 35, 36, 46, 48, 49, 56, 72, 73, 76, 77, 81, 83, 85, 88, 99, 100]                                                 |
|  | Satisfaction with care facility*       | 8  | [30, 38, 42, 60, 79, 83, 94, 100]                                                                                         |
|  | Quality of life                        | /  | /                                                                                                                         |
|  | <b>Organizational Health Literacy*</b> |    |                                                                                                                           |
|  | Access to Health Information*          | 25 | [23–25, 28, 31, 33, 37, 40, 41, 47–50, 70, 75–77, 84, 85, 91, 93, 94, 100]                                                |
|  | <b>Individual Health literacy*</b>     |    |                                                                                                                           |
|  | Literacy*                              | 2  | [62, 100]                                                                                                                 |
|  | Knowledge*                             | 39 | [24, 27–29, 31–38, 41, 43, 45, 47–53, 55, 58, 63, 68, 70, 74–79, 85, 88, 91, 93, 101, 102]                                |
|  | Motivation*                            | 4  | [35, 76, 78, 99]                                                                                                          |
|  | Competences*                           | 22 | [23, 24, 28, 30, 33, 38, 40, 49, 51, 53, 57, 62, 64, 65, 68, 71, 75, 76, 83, 90, 102, 103]                                |

\*These factors were inductive codes, developed along the data material

### **Quality assessment of publications with a qualitative study design**

Of the 77 qualitative studies, four (5%) reported all ten aspects of the critical appraisal checklist for qualitative research [20]. Most qualitative studies (n=69, 90%) reported between five and nine criteria from the checklist, and four studies (5%) reported fewer than five criteria. The two quality criteria that were most frequently fulfilled with 95% each (n=73) are the “congruity between the stated philosophical perspective and the research methodology” and the “congruity between the research methodology and the methods used to collect data” [20]. In contrast, the “influence of the researcher on the research, and vice-versa” [20] is only addressed in nine publications (12%).

### **Discussion**

This scoping review provides a recent overview of the development and application of the BMHSU in very different care settings, across different diseases, and among publications examining different target groups. The BMHSU is mainly used in quantitative studies, but our review also shows the usefulness of the model in qualitative research.

#### **Quantitative overview of the use of the BMHSU in health services research**

The general reception toward the BMHSU has increased considerably in recent years, as has the number of publications adopting this model, with most (70%) of all related publications stemming from the USA and Canada. This is in line with another review [3], which excluded specific care settings and diseases. The dominance of research projects adopting quantitative design [104] is reflected in this scoping review, as 89% of the identified publications used quantitative methods.

The BMHSU is mainly used for research examining health care in general, without focusing on specific diseases. This is not surprising, as the recent BMHSU was not developed for any specific care setting or disease [16]. Still, a wide range of publications have focused on specific care settings (e.g., nursing, mental health services) and diseases (e.g., mental disorders). Individuals aged  $\geq 50$  years are the largest target group represented in this overview. Possible

1  
2 explanations for this finding include the fact that this population represents the largest, and  
3  
4 fastest growing cohort in the broader population [105]. Further, this group uses health care  
5  
6 services most frequently [106].  
7

### 9 **Qualitative synthesis on the use of the BMHSU in qualitative health services research**

10 The relevance of the BMHSU for qualitative projects within health services research is  
11  
12 demonstrated by our results. Still, there are some limitations within the BMHSU, which should  
13  
14 be critically considered depending on the research question.  
15  
16

17  
18 The publications featuring a qualitative design mainly consider the individual characteristics  
19  
20 within the BMHSU. Since the primary interest of qualitative research is the subjective  
21  
22 experience of individuals, this result is not surprising [107]. In addition, it was noted that people  
23  
24 from the target group were primarily interviewed in these studies, while there were fewer next  
25  
26 of kin or health professionals interviewed. Experts may wish to consider obtaining more  
27  
28 information about contextual characteristics in their research. Since the data extraction within  
29  
30 the quantitative overview was carried out at the level of titles and abstracts, it is not possible to  
31  
32 determine whether contextual characteristics in publications featuring a quantitative study  
33  
34 design are more strongly represented in this review.  
35  
36  
37

38  
39 Although over half of all publications that adopted a qualitative design had been published since  
40  
41 2013, most of them considered the Andersen model of 1995, which is also a result of the review  
42  
43 by Babitsch et al. (2012) [3]. Only one of the publications with a qualitative design [55] adopted  
44  
45 the most current and comprehensive BMHSU from the year 2013 [16]. This is interesting, as  
46  
47 some authors expanded upon an older version of the BMHSU and justified various missing  
48  
49 factors (e.g., provider negligence and dissatisfaction, location of a clinic), although these factors  
50  
51 are actually included in the most current version of the BMHSU from 2013 [16].  
52  
53  
54

55  
56 One new factor that has been discussed in some of the considered studies is health literacy.  
57  
58 Health literacy relates to many parts of the Andersen model and cannot be assigned to a specific  
59  
60

1  
2 level or factor. We recommend integrating health literacy as an additional factor in the BMHSU,  
3  
4 as an individual's health literacy and health-literate organizations are important foundations for  
5  
6 the (non-)use of health care services, and consequently for health care research [95, 96].  
7  
8

### 9 **Strengths and limitations**

10 When interpreting the results, it should be noted that although we performed systematic  
11  
12 searches, some publications might have been missed. For example, articles that did not mention  
13  
14 the BMHSU, or the three core factors in the title and abstract were not included; further, articles  
15  
16 may have been excluded given that we restricted our search to five databases. Another  
17  
18 limitation is that the extraction of publication characteristics was divided between the first  
19  
20 authors (ML, JT) and were not extracted twice. We considered the general utilization of the  
21  
22 BMHSU in health services research (as identified in the quantitative overview) at the title and  
23  
24 abstract level, and not at the full-text level. An analysis of the full texts could provide further  
25  
26 information about – and more detailed insights into – the application of the BMHSU. When  
27  
28 coding the results based on the various model factors, one challenge faced by our team was  
29  
30 appropriately assigning the factors, as the assignment of the factors was not always clear. Also,  
31  
32 our comparison of the various studies that adopted a qualitative design is limited by the fact  
33  
34 that very different versions of the model were used.  
35  
36  
37  
38  
39  
40

41 It should be noted that this scoping review is the first to explore the application of the widely  
42  
43 adopted BMHSU without limiting our search based on target group, care setting, or disease  
44  
45 since the model was initially published in 1968. Further, this review examined publications  
46  
47 adopting qualitative study designs, strengthening the perceptions of qualitative methods in  
48  
49 health care research. This review provides the first-ever overview of the (un)suitability of the  
50  
51 BMHSU in qualitative research.  
52  
53  
54

### 55 **Conclusion**

56 This scoping review reveals that the BMHSU, which is one of the main models in health care  
57  
58 services research, has broad applications in very different care settings and across various  
59  
60

1 diseases, and it focuses on a wide range of target groups. The BMHSU is mainly used in  
2 quantitative studies, but our review also shows the usefulness of the model for qualitative  
3 research. As health literacy in particular plays an increasingly important role in health care  
4 utilization [95], we think it is important to take this factor into account in the BMHSU. In further  
5 research, it would be interesting to examine this relationship more thoroughly. Additionally, it  
6 might be interesting to compare the application of the BMHSU in quantitative and qualitative  
7 research. The application of so many different (and older) models of health care utilization  
8 makes it difficult to compare the individual studies with one another. However, such a  
9 comparison would be particularly important in the context of health services research. For  
10 future health services research, the current and most comprehensive version of the BMHSU  
11 [16] should always be considered.

### 27 **Competing interests**

28 The authors declare that they have no competing interests.

### 31 **Funding**

32 This manuscript is supported by the cooperative doctoral study course, “Health Services  
33 Research: Collaborative Care” located in Freiburg, Germany. The doctoral study course is, in  
34 turn, brought forward by the Ministry of Science, Research and the Arts Baden-Württemberg.  
35 The article processing charge was funded by the Baden-Württemberg Ministry of Science,  
36 Research and Culture and the University of Education, Freiburg in the funding programme  
37 Open Access Publishing.

### 46 **Author contributions**

47 ML, JT built the search strategy, screened the search results, and extracted the data. ML, JT,  
48 and EMB interpreted the findings and wrote the manuscript. All authors read and approved the  
49 final manuscript.

### 55 **Acknowledgements**

56 We thank Dr. Lisa Lyssenko for her valuable comments on an earlier draft of the manuscript.

## REFERENCES

- 1 Gellman MD, Turner JR, eds. *Encyclopedia of Behavioral Medicine*. New York, NY: Springer 2013.
- 2 Advisory Council on the Assessment of Developments in the Health Care System. *Needs-Based Regulation of the Health Care Provision: Introduction and Summary* 2018.
- 3 Babitsch B, Gohl D, Lengerke Tv. Re-revisiting Andersen's Behavioral Model of Health Services Use: a systematic review of studies from 1998-2001. *GMS Psycho-Social-Medicine* 2012;9:1–15.
- 4 Baumann W, Farin E, Menzel-Begemann A, et al. Memorandum IV: Theoretical and Normative Grounding of Health Services Research. *Gesundheitswesen* 2016;78(5):337–52 (accessed 27 Sep 2019).
- 5 Weiner BJ, Amick HR, Lund JL, et al. Use of qualitative methods in published health services and management research: a 10-year review. *Medical care research and review: MCRR* 2011;68(1):3–33 (accessed 16 Apr 2019).
- 6 Ricketts TC, Goldsmith LJ. Access in health services research: the battle of the frameworks. *Nurs Outlook* 2005;53(6):274–80 (accessed 4 Jul 2019).
- 7 Andersen R. *A behavioral model of families' use of health services*. Chicago, Ill.: Univ. of Chicago 1968.
- 8 Andersen RM. National Health Surveys and the Behavioral Model of Health Services Use. *Med Care* 2008;46(7):647–53.
- 9 Andersen RM. Revisiting the Behavioral Model and Access to Medical Care: Does it Matter? *J Health Soc Behav* 1995;36(1):1–10.
- 10 Lengerke Tv, Gohl D, Babitsch B. Re-visiting the Behavioral Model of Health Care Utilization by Andersen: A Review on Theoretical Advances and Perspectives. In: Janssen



- 1  
2 C, Swart E, Lengerke Tv, eds. Health Care Utilization in Germany: Theory, Methodology,  
3 and Results. New York: Springer New York 2014:11–28.  
4  
5  
6  
7 11 Andersen R, Newman JF. Societal and individual determinants of medical care utilization  
8 in the United States. *Milbank Mem Fund Q Health Soc* 1973;51(1):95–124.  
9  
10  
11 12 Aday LA, Andersen R. A Framework for the Study of Access to Medical Care. *BMC*  
12 *Health Serv Res* 1974:208–20.  
13  
14  
15 13 Gelberg L, Andersen RM, Leake BD. The Behavioral Model for Vulnerable Populations:  
16 application to medical care use and outcomes for homeless people. *Health Services*  
17 *Research* 2000;34(6):1273–302.  
18  
19  
20  
21  
22 14 Fouladbakhsh JM, Stommel M. Using the behavioral model for complementary and  
23 alternative medicine: The CAM healthcare model. *Journal of Complementary and*  
24 *Integrative Medicine* 2007;4(1).  
25  
26  
27  
28  
29 15 Gelberg L, Andersen RM, Leake B. The Behavioral Model for Vulnerable Populations:  
30 Application to Medical Care Use and Outcomes for Homeless People. *Health Services*  
31 *Research* 2000;34(6) (accessed 13 Sep 2018).  
32  
33  
34  
35  
36 16 Andersen RM, Davidson PL, Baumeister SE. Improving Access to Care. In: Kominski GF,  
37 ed. Changing the U.S. health care system: Key issues in health services policy and  
38 management, 4th edn. San Francisco, California: Jossey-Bass 2013:33–69.  
39  
40  
41  
42  
43 17 Guilcher SJT, Craven BC, McColl MA, et al. Application of the Andersen's health care  
44 utilization framework to secondary complications of spinal cord injury: a scoping review.  
45 *Disabil Rehabil* 2011;34(7):531–41.  
46  
47  
48  
49  
50 18 Chong WF, Ho RM-H. Caregiver needs and formal long-term care service utilization in  
51 the Andersen Model: An individual-participant systematic review and meta-analysis.  
52 *International Journal of Integrated Care* 2018;18.  
53  
54  
55  
56  
57  
58  
59  
60

- 1  
2  
3  
4  
5  
6  
7  
8  
9  
10  
11  
12  
13  
14  
15  
16  
17  
18  
19  
20  
21  
22  
23  
24  
25  
26  
27  
28  
29  
30  
31  
32  
33  
34  
35  
36  
37  
38  
39  
40  
41  
42  
43  
44  
45  
46  
47  
48  
49  
50  
51  
52  
53  
54  
55  
56  
57  
58  
59  
60
- 19 Tricco AC, Lillie E, Zarin W, et al. PRISMA Extension for Scoping Reviews (PRISMA-ScR): Checklist and Explanation. *Ann Intern Med* 2018;169(7):467–73 (accessed 10 Aug 2020).
- 20 Joanna Briggs Institute. Checklist for Qualitative Research 2017. Available at: [https://joannabriggs.org/sites/default/files/2019-05/JBI\\_Critical\\_Appraisal-Checklist\\_for\\_Qualitative\\_Research2017\\_0.pdf](https://joannabriggs.org/sites/default/files/2019-05/JBI_Critical_Appraisal-Checklist_for_Qualitative_Research2017_0.pdf) Accessed August 26, 2019.
- 21 VERBI GmbH. MAXQDA: The Art of Data Analysis. Available at: <https://www.maxqda.de/> Accessed January 27, 2020.
- 22 Kuckartz U. Qualitative text analysis: A guide to methods, practice & using software. Los Angeles: SAGE 2014.
- 23 Andrasik MP, Rose R, Pereira D, et al. Barriers to cervical cancer screening among low-income HIV-positive African American women. *J Health Care Poor Underserved* 2008;19(3):912–25.
- 24 Artuso S, Cargo M, Brown A, et al. Factors influencing health care utilisation among Aboriginal cardiac patients in central Australia: a qualitative study. *BMC Health Serv Res* 2013;13:83.
- 25 Bascur-Castillo C, Araneda-Gatica V, Castro-Arias H, et al. Determinants in the process of seeking help for urinary incontinence in the Chilean health system. *Int J Gynaecol Obstet* 2019;144(1):103–11.
- 26 Bayuo J. Experiences with out-patient hospital service utilisation among older persons in the Asante Akyem North District- Ghana. *BMC Health Serv Res* 2017;17(1):652.
- 27 Boateng L, Nicolaou M, Dijkshoorn H, et al. An exploration of the enablers and barriers in access to the Dutch healthcare system among Ghanaians in Amsterdam. *BMC Health Serv Res* 2012;12:75.

- 1  
2 28 Bradbury-Jones C, Breckenridge JP, Devaney J, et al. Disabled women's experiences of  
3  
4 accessing and utilising maternity services when they are affected by domestic abuse: a  
5  
6 critical incident technique study. *BMC Pregnancy Childbirth* 2015;15:181.  
7  
8  
9 29 Bradley EH, McGraw SA, Curry L, et al. Expanding the Andersen model: the role of  
10  
11 psychosocial factors in long-term care use. *Health Services Research* 2002;37(5):1221–  
12  
13 42.  
14  
15  
16 30 Butler C, Kim-Godwin Y, Fox JA. Exploration of health care concerns of Hispanic women  
17  
18 in a rural southeastern North Carolina community. *Online Journal of Rural Nursing and*  
19  
20 *Health Care* 2008;8(2):22–32.  
21  
22  
23 31 Chiu TML. Usage and Non-usage Behaviour of eHealth Services Among Chinese  
24  
25 Canadians Caring for a Family Member with Dementia 2008.  
26  
27  
28 32 Chiu MWY. Psychosocial responses to falling in older Chinese immigrants living in the  
29  
30 community 2011.  
31  
32  
33 33 Conner NE, Chase SK. Decisions and caregiving: End of life among Blacks from the  
34  
35 perspective of informal caregivers and decision makers. *Am J Hosp Palliat Care*  
36  
37 2015;32(4):454–63. [http://www.redi-  
42  
43 bw.de/db/ebSCO.php/search.ebSCOhost.com/login.aspx%3fdirect%3dtrue%26db%3dpsyh  
44  
45 %26AN%3d2015-21262-013%26site%3dehost-live](http://www.redi-<br/>38<br/>39 bw.de/db/ebSCO.php/search.ebSCOhost.com/login.aspx%3fdirect%3dtrue%26db%3dpsyh<br/>40<br/>41 %26AN%3d2015-21262-013%26site%3dehost-live).  
46  
47  
48 34 Corboy D, McDonald J, McLaren S. Barriers to accessing psychosocial support services  
49  
50 among men with cancer living in rural Australia: Perceptions of men and health  
51  
52 professionals. *Int J Mens Health* 2011;10(2):163–83. [http://www.redi-  
57  
58 bw.de/db/ebSCO.php/search.ebSCOhost.com/login.aspx%3fdirect%3dtrue%26db%3dpsyh  
59  
60 %26AN%3d2011-21872-004%26site%3dehost-live](http://www.redi-<br/>53<br/>54 bw.de/db/ebSCO.php/search.ebSCOhost.com/login.aspx%3fdirect%3dtrue%26db%3dpsyh<br/>55<br/>56 %26AN%3d2011-21872-004%26site%3dehost-live).  
61  
62  
63 35 Doshi RK, Malebranche D, Bowleg L, et al. Health care and HIV testing experiences  
64  
65 among Black men in the South: implications for "Seek, Test, Treat, and Retain" HIV  
66  
67 prevention strategies. *AIDS Patient Care STDS* 2013;27(2):123–33.

- 1  
2 36 Gill P, Logan K, John B, et al. Participants' experiences of ketamine bladder syndrome: A  
3  
4 qualitative study. *International Journal of Urological Nursing* 2018;12(2/3):76–83.  
5  
6 [http://www.redi-  
bw.de/db/ebSCO.php/search.ebSCOhost.com/login.aspx%3fdirect%3dtrue%26db%3dcin20  
%26AN%3d132481296%26site%3dehost-live.](http://www.redi-<br/>7<br/>8<br/>9<br/>10<br/>11<br/>12<br/>13<br/>14<br/>15<br/>16<br/>17<br/>18<br/>19<br/>20<br/>21<br/>22<br/>23<br/>24<br/>25<br/>26<br/>27<br/>28<br/>29<br/>30<br/>31<br/>32<br/>33<br/>34<br/>35<br/>36<br/>37<br/>38<br/>39<br/>40<br/>41<br/>42<br/>43<br/>44<br/>45<br/>46<br/>47<br/>48<br/>49<br/>50<br/>51<br/>52<br/>53<br/>54<br/>55<br/>56<br/>57<br/>58<br/>59<br/>60)
- 37 Hawk M, Coulter RWS, Egan JE, et al. Exploring the Healthcare Environment and  
Associations with Clinical Outcomes of People Living with HIV/AIDS. *AIDS Patient  
Care STDS* 2017;31(12):495–503.
- 38 Herrera AP, Lee J, Palos G, et al. Cultural influences in the patterns of long-term care use  
among Mexican American family caregivers. *J Appl Gerontol* 2008;27(2):141–65.  
[http://www.redi-  
bw.de/db/ebSCO.php/search.ebSCOhost.com/login.aspx%3fdirect%3dtrue%26db%3dpsych  
%26AN%3d2008-03902-002%26site%3dehost-live.](http://www.redi-<br/>bw.de/db/ebSCO.php/search.ebSCOhost.com/login.aspx%3fdirect%3dtrue%26db%3dpsych<br/>%26AN%3d2008-03902-002%26site%3dehost-live)
- 39 Herrmann WJ, Haarmann A, Bærheim A. A sequential model for the structure of health  
care utilization. *PLoS ONE* 2017;12(5):e0176657.
- 40 Holtzman CW, Shea JA, Glanz K, et al. Mapping patient-identified barriers and  
facilitators to retention in HIV care and antiretroviral therapy adherence to Andersen's  
Behavioral Model. *AIDS Care* 2015;27(7):817–28.
- 41 Ko LK, Taylor VM, Mohamed FB, et al. "We brought our culture here with us": A  
qualitative study of perceptions of HPV vaccine and vaccine uptake among East African  
immigrant mothers. *Papillomavirus Res* 2018;7:21–25.
- 42 Goh SN. Post Acute Care of the Elderly in Singapore What Factors Influence Use of  
Services? *Asia Pacific Journal of Social Work and Development* 2011;21(1):31–53.  
[http://gateway.webofknowledge.com/gateway/Gateway.cgi?GWVersion=2&SrcAuth=SwissAcademicSoftware&SrcApp=Citavi&DestLinkType=FullRecord&DestApp=WOS  
&KeyUT=000292427400004.](http://gateway.webofknowledge.com/gateway/Gateway.cgi?GWVersion=2&SrcAuth=SwissAcademicSoftware&SrcApp=Citavi&DestLinkType=FullRecord&DestApp=WOS<br/>&KeyUT=000292427400004)

- 1  
2 43 Koce F, Randhawa G, Ochieng B. Understanding healthcare self-referral in Nigeria from  
3  
4 the service users' perspective: a qualitative study of Niger state. *BMC Health Serv Res*  
5  
6 2019;19(1):209.  
7  
8  
9 44 Kohno A, Nik Farid ND, Musa G, et al. Factors affecting Japanese retirees' healthcare  
10  
11 service utilisation in Malaysia: a qualitative study. *BMJ Open* 2016;6(3):e010668.  
12  
13 45 Maulik PK, Tewari A, Devarapalli S, et al. The Systematic Medical Appraisal, Referral  
14  
15 and Treatment (SMART) Mental Health Project: Development and Testing of Electronic  
16  
17 Decision Support System and Formative Research to Understand Perceptions about  
18  
19 Mental Health in Rural India. *PLoS ONE* 2016;11(10):e0164404.  
20  
21  
22 46 Mukasa B. Maternal and child health access disparities among recent African immigrants  
23  
24 in the United States 2016.  
25  
26  
27 47 Obikunle AF. Barriers to breast cancer prevention and screening among African American  
28  
29 women 2016.  
30  
31  
32 48 Parkman T, Neale J, Day E, et al. Qualitative exploration of why people repeatedly attend  
33  
34 emergency departments for alcohol-related reasons. *BMC Health Serv Res*  
35  
36 2017;17(1):140.  
37  
38  
39 49 Porteous T, Wyke S, Hannaford P, et al. Self-care behaviour for minor symptoms: can  
40  
41 Andersen's Behavioral Model of Health Services Use help us to understand it? *Int J Pharm*  
42  
43 *Pract* 2015;23(1):27–35.  
44  
45  
46 50 Röst M, Jonsson C, Liljestränd J, et al. Social differentiation and embodied dispositions:  
47  
48 a qualitative study of maternal care-seeking behaviour for near-miss morbidity in Bolivia.  
49  
50 *Reprod Health* 2009;6:13.  
51  
52  
53 51 Schatz E, Seeley J, Negin J, et al. "For us here, we remind ourselves": strategies and  
54  
55 barriers to ART access and adherence among older Ugandans. *BMC Public Health*  
56  
57 2019;19(1):131.  
58  
59  
60

- 1  
2 52 Serna CA. Exploring oral health problems in adult hispanic migrant farmworkers: A  
3 mixed-methods approach 2014.  
4  
5  
6 53 Tewari A, Kallakuri S, Devarapalli S, et al. Process evaluation of the systematic medical  
7 appraisal, referral and treatment (SMART) mental health project in rural India. *BMC*  
8 *Psychiatry* 2017;17(1):385.  
9  
10  
11  
12  
13 54 White AW. The role of social and cultural factors on preventive health service use among  
14 young, rural, African American men: A narrative inquiry 2017.  
15  
16  
17  
18 55 Isaak C.A., Mota N., Medved M., et al. Conceptualizations of help-seeking for mental  
19 health concerns in First Nations communities in Canada: A comparison of fit with the  
20 Andersen Behavioral Model. *Transcult. Psychiatry* 2020.  
21 <http://tps.sagepub.com/content/by/year>.  
22  
23  
24  
25  
26  
27 56 Lee HY, Lee MH, Jang YJ, et al. Breast Cancer Screening Disparity among Korean  
28 American Immigrant Women in Midwest. *Asian Pac J Cancer Prev* 2017;18(10):2663–  
29 67.  
30  
31  
32  
33  
34 57 Roberson M.C. Refusal of epidural anesthesia for labor pain management by African  
35 American parturients: An examination of factors. *AANA J.* 2019;87(4):299–304.  
36 <https://www.aana.com/publications/aana-journal>.  
37  
38  
39  
40  
41 58 Due C., Aldam I., Ziersch A. Understanding oral health help-seeking among Middle  
42 Eastern refugees and asylum seekers in Australia: An exploratory study. *Community Dent*  
43 *Oral Epidemiol* 2020.  
44  
45  
46  
47  
48 59 Green D.C., Wheeler E.M. A Qualitative Exploration of Facilitators for Health Service  
49 Use among Aging Gay Men Living with HIV. *J. Int. Assoc. Providers AIDS Care* 2019;18.  
50 <http://jia.sagepub.com/content/by/year>.  
51  
52  
53  
54  
55 60 Fleury M.-J., Grenier G., Farand L., et al. Reasons for Emergency Department Use among  
56 Patients with Mental Disorders. *Psychiatr Q* 2019;90(4):703–16.  
57 <http://www.wkap.nl/journalhome.htm/0033-2720>.  
58  
59  
60

- 1  
2 61 Coleman TM. Help-seeking experiences of African American men with depression 2019.  
3  
4 62 Opoku D, Busse R, Quentin W. Achieving Sustainability and Scale-Up of Mobile Health  
5  
6 Noncommunicable Disease Interventions in Sub-Saharan Africa: Views of Policy Makers  
7  
8 in Ghana. *JMIR Mhealth Uhealth* 2019;7(5):e11497.  
9  
10  
11 63 Blanas DA, Nichols K, Bekele M, et al. Adapting the Andersen model to a francophone  
12  
13 West African immigrant population: hepatitis B screening and linkage to care in New  
14  
15 York City. *J Community Health* 2015;40(1):175–84.  
16  
17  
18 64 Callahan CC. Cancer, vulnerability, and financial quality of life: A mixed methods study  
19  
20 2012.  
21  
22  
23 65 Cathers LA. Exploring substance use disorders community outpatient counselors'  
24  
25 experiences treating clients with co-occurring medical conditions: An interpretative  
26  
27 phenomenological analysis 2014.  
28  
29  
30 66 Coe AB, Moczygemba LR, Gatewood SBS, et al. Medication adherence challenges among  
31  
32 patients experiencing homelessness in a behavioral health clinic. *Res Social Adm Pharm*  
33  
34 2015;11(3):e110-20.  
35  
36  
37 67 Levison JH, Bogart LM, Khan IF, et al. "Where It Falls Apart": Barriers to Retention in  
38  
39 HIV Care in Latino Immigrants and Migrants. *AIDS Patient Care STDS* 2017;31(9):394–  
40  
41 405.  
42  
43  
44 68 Lor B, Ornelas IJ, Magarati M, et al. We Should Know Ourselves: Burmese and Bhutanese  
45  
46 Refugee Women's Perspectives on Cervical Cancer Screening. *J Health Care Poor*  
47  
48 *Underserved* 2018;29(3):881–97.  
49  
50  
51 69 Noh H, Schroepfer TA. Terminally ill African American elders' access to and use of  
52  
53 hospice care. *Am J Hosp Palliat Care* 2015;32(3):286–97.  
54  
55  
56 70 Rice MB. Attitudes of women offenders towards medicaid enrollment and coverage under  
57  
58 the Affordable Care Act 2017.  
59  
60

- 1  
2 71 Scott KL. Delay to treatment for Latinos diagnosed with lung and head-and-neck cancers:  
3  
4 Application of the behavioral model for vulnerable populations 2013.  
5  
6  
7 72 Velez D, Palomo-Zerfas A, Nunez-Alvarez A, et al. Facilitators and Barriers to Dental  
8  
9 Care Among Mexican Migrant Women and Their Families in North San Diego County. *J*  
10  
11 *Immigr Minor Health* 2017;19(5):1216–26.  
12  
13  
14 73 Dergal J. Family members' use of private companions in nursing homes: A mixed methods  
15  
16 study 2012.  
17  
18 74 Gräbel E, Luttenberger K, Trilling A, et al. Counselling for dementia caregivers-predictors  
19  
20 for utilization and expected quality from a family caregiver's point of view. *Eur J Ageing*  
21  
22 2010;7(2):111–19.  
23  
24  
25 75 Henson LA, Higginson IJ, Daveson BA, et al. 'I'll be in a safe place': a qualitative study  
26  
27 of the decisions taken by people with advanced cancer to seek emergency department care.  
28  
29 *BMJ Open* 2016;6(11).  
30  
31 [http://gateway.webofknowledge.com/gateway/Gateway.cgi?GWVersion=2&SrcAuth=SwissAcademicSoftware&SrcApp=Citavi&DestLinkType=FullRecord&DestApp=WOS](http://gateway.webofknowledge.com/gateway/Gateway.cgi?GWVersion=2&SrcAuth=SwissAcademicSoftware&SrcApp=Citavi&DestLinkType=FullRecord&DestApp=WOS&KeyUT=000391303400076)  
32  
33 [wossAcademicSoftware&SrcApp=Citavi&DestLinkType=FullRecord&DestApp=WOS](http://gateway.webofknowledge.com/gateway/Gateway.cgi?GWVersion=2&SrcAuth=SwissAcademicSoftware&SrcApp=Citavi&DestLinkType=FullRecord&DestApp=WOS&KeyUT=000391303400076)  
34  
35 [&KeyUT=000391303400076](http://gateway.webofknowledge.com/gateway/Gateway.cgi?GWVersion=2&SrcAuth=SwissAcademicSoftware&SrcApp=Citavi&DestLinkType=FullRecord&DestApp=WOS&KeyUT=000391303400076).  
36  
37  
38  
39 76 Navarro-Millan I, Zinski A, Shurbaji S, et al. Perspectives of Rheumatoid Arthritis  
40  
41 Patients on Electronic Communication and Patient-Reported Outcome Data Collection: A  
42  
43 Qualitative Study. *Arthritis Care and Research* 2019;71(1):80–87.  
44  
45  
46 77 Rachlis B, Naanyu V, Wachira J, et al. Community Perceptions of Community Health  
47  
48 Workers (CHWs) and Their Roles in Management for HIV, Tuberculosis and  
49  
50 Hypertension in Western Kenya. *PLoS ONE* 2016;11(2):e0149412.  
51  
52  
53 78 Rachlis B, Naanyu V, Wachira J, et al. Identifying common barriers and facilitators to  
54  
55 linkage and retention in chronic disease care in western Kenya. *BMC Public Health*  
56  
57 2016;16:741.  
58  
59  
60



- 1  
2 79 Rianga'a RM, Nangulu AK, Broerse JEW. "I should have started earlier, but I was not  
3  
4 feeling ill!" Perceptions of Kalenjin women on antenatal care and its implications on initial  
5  
6 access and differentials in patterns of antenatal care utilization in rural Uasin Gishu  
7  
8 County Kenya. *PLoS ONE* 2018;13(10):e0202895.
- 9  
10  
11 80 Victor C, Davies S, Dickinson A, et al. "It just happens". Care home residents' experiences  
12  
13 and expectations of accessing GP care. *Arch Gerontol Geriatr* 2018;79:97–103.
- 14  
15  
16 81 Condelius A, Andersson M. Exploring access to care among older people in the last phase  
17  
18 of life using the behavioural model of health services use: a qualitative study from the  
19  
20 perspective of the next of kin of older persons who had died in a nursing home. *BMC*  
21  
22 *Geriatr* 2015;15:138.
- 23  
24  
25 82 Han H, Perumalswami P, Kleinman L, et al. Voices of multi-ethnic providers in NYC:  
26  
27 Health care for viral hepatitis. *Hepatology* 2013;Conference 64th Annual Meeting of the  
28  
29 American Association for the Study of Liver Diseases The Liver Meeting 2013.  
30  
31 Washington, DC United States. Conference Publication:1195A-1196A.  
32  
33 [http://ovidsp.ovid.com/ovidweb.cgi?T=JS&CSC=Y&NEWS=N&PAGE=fulltext&D=e](http://ovidsp.ovid.com/ovidweb.cgi?T=JS&CSC=Y&NEWS=N&PAGE=fulltext&D=emed14&AN=71238042)  
34  
35 [med14&AN=71238042](http://ovidsp.ovid.com/ovidweb.cgi?T=JS&CSC=Y&NEWS=N&PAGE=fulltext&D=emed14&AN=71238042).
- 36  
37  
38  
39 83 Perry R, Gard Read J, Chandler C, et al. Understanding Participants' Perceptions of Access  
40  
41 to and Satisfaction With Chronic Disease Prevention Programs. *Health Educ Behav*  
42  
43 2019:1090198118822710.
- 44  
45  
46 84 Thiessen K, Heaman M, Mignone J, et al. Barriers and facilitators related to  
47  
48 implementation of regulated midwifery in Manitoba: a case study. *BMC Health Serv Res*  
49  
50 2016;16:1–22. [http://www.redi-](http://www.redi-bw.de/db/ebSCO.php/search.ebscohost.com/login.aspx%3fdirect%3dtrue%26db%3dcin20%26AN%3d113906425%26site%3dehost-live)  
51  
52 [bw.de/db/ebSCO.php/search.ebscohost.com/login.aspx%3fdirect%3dtrue%26db%3dcin20](http://www.redi-bw.de/db/ebSCO.php/search.ebscohost.com/login.aspx%3fdirect%3dtrue%26db%3dcin20%26AN%3d113906425%26site%3dehost-live)  
53  
54 [%26AN%3d113906425%26site%3dehost-live](http://www.redi-bw.de/db/ebSCO.php/search.ebscohost.com/login.aspx%3fdirect%3dtrue%26db%3dcin20%26AN%3d113906425%26site%3dehost-live).
- 55  
56  
57  
58  
59  
60

- 1  
2 85 Briones-Vozmediano E., Castellanos-Torres E., Goicolea I., et al. Challenges to Detecting  
3 and Addressing Intimate Partner Violence Among Roma Women in Spain: Perspectives  
4 of Primary Care Providers. *J Interpers Violence* 2019;886260519872299.  
5  
6  
7  
8  
9 86 Chao Y.-Y., Seo J.Y., Katigbak C., et al. Utilization of Mental Health Services Among  
10 Older Chinese Immigrants in New York City. *Community Ment Health J* 2020.  
11  
12  
13 87 Shewamene Z, Dune T, Smith CA. Use of traditional and complementary medicine for  
14 maternal health and wellbeing by African migrant women in Australia: a mixed method  
15 study. *BMC Complement Med Ther* 2020;20(1):60.  
16  
17  
18  
19  
20 88 Majaj L, Nassar M, Allegri M. "It's not easy to acknowledge that I'm ill": a qualitative  
21 investigation into the health seeking behavior of rural Palestinian women. *BMC Womens*  
22 *Health* 2013;13.  
23  
24  
25  
26  
27 <http://gateway.webofknowledge.com/gateway/Gateway.cgi?GWVersion=2&SrcAuth=S>  
28  
29 [wissAcademicSoftware&SrcApp=Citavi&DestLinkType=FullRecord&DestApp=WOS](http://gateway.webofknowledge.com/gateway/Gateway.cgi?GWVersion=2&SrcAuth=S)  
30  
31 [&KeyUT=000320055000001.](http://gateway.webofknowledge.com/gateway/Gateway.cgi?GWVersion=2&SrcAuth=S)  
32  
33  
34 89 Rodriguez HR, Dobalian A. Provider and Administrator Experiences With Providing HIV  
35 Treatment and Prevention Services in Rural Areas. *AIDS Educ Prev* 2017;29(1):77–91.  
36  
37  
38 90 Nowgesic EF. Antiretroviral Therapy Access, Acceptance and Adherence among Urban  
39 Indigenous Peoples Living with HIV in Saskatchewan: The Indigenous Red Ribbon  
40 Storytelling Study 2015.  
41  
42  
43  
44  
45 91 Heidari P., Cross W., Weller C., et al. Rheumatologists' insight into medication adherence  
46 in patients with rheumatoid arthritis: A qualitative study. *Int. J. Rheum. Dis.*  
47  
48 2019;22(9):1695–705. [http://onlinelibrary.wiley.com/journal/10.1111/\(ISSN\)1756-](http://onlinelibrary.wiley.com/journal/10.1111/(ISSN)1756-)  
49  
50  
51  
52  
53  
54  
55 92 Robinson P.G., Douglas G.V.A., Gibson B.J., et al. Remuneration of primary dental care  
56 in England: A qualitative framework analysis of perspectives of a new service delivery  
57  
58  
59  
60

- 1  
2 model incorporating incentives for improved access, quality and health outcomes. *BMJ*  
3  
4 *Open* 2019;9(10):e031886. <http://bmjopen.bmj.com/content/early/by/section>.  
5  
6  
7 93 Travers J.L., Hirschman K.B., Naylor M.D. Adapting Andersen's expanded behavioral  
8  
9 model of health services use to include older adults receiving long-term services and  
10  
11 supports. *BMC Geriatr* 2020;20(1):58.  
12  
13  
14 94 Grodensky CA, Rosen DL, Blue CM, et al. Medicaid Enrollment among Prison Inmates  
15  
16 in a Non-expansion State: Exploring Predisposing, Enabling, and Need Factors Related to  
17  
18 Enrollment Pre-incarceration and Post-Release. *Journal of urban health: bulletin of the*  
19  
20 *New York Academy of Medicine* 2018;95(4):454–66.  
21  
22  
23 95 Sørensen K, van den Broucke S, Fullam J, et al. Health literacy and public health: a  
24  
25 systematic review and integration of definitions and models. *BMC Public Health*  
26  
27 2012;12:80 (accessed 20 Dec 2019).  
28  
29  
30 96 Brach C, Keller D, Hernandez Lyla M, et al. Ten Attributes of Health Literate Health Care  
31  
32 Organizations 2012. Available at: [https://nam.edu/wp-](https://nam.edu/wp-content/uploads/2015/06/BPH_Ten_HLit_Attributes.pdf)  
33  
34 [content/uploads/2015/06/BPH\\_Ten\\_HLit\\_Attributes.pdf](https://nam.edu/wp-content/uploads/2015/06/BPH_Ten_HLit_Attributes.pdf). Accessed January 07, 2020.  
35  
36  
37 97 Go VF-I, Quan VM, Chung A, et al. Gender gaps, gender traps: sexual identity and  
38  
39 vulnerability to sexually transmitted diseases among women in Vietnam. *Soc Sci Med*  
40  
41 2002;55(3):467–81.  
42  
43  
44 98 Sperber NR, Andrews SM, Voils CI, et al. Barriers and Facilitators to Adoption of  
45  
46 Genomic Services for Colorectal Care within the Veterans Health Administration. *J Pers*  
47  
48 *Med* 2016;6(2).  
49  
50  
51 99 Mago A, MacEntee MI, Brondani M, et al. Anxiety and anger of homeless people coping  
52  
53 with dental care. *Community Dent Oral Epidemiol* 2018;46(3):225–30.  
54  
55  
56 100 Richards C. Women's experiences with the follow-up system for cervical cancer in a  
57  
58 developing country. 76 2015.  
59  
60

- 1  
2 101 Bradbury-Jones C, Breckenridge JP, Devaney J, et al. Priorities and strategies for  
3  
4 improving disabled women's access to maternity services when they are affected by  
5  
6 domestic abuse: a multi-method study using concept maps. *BMC Pregnancy Childbirth*  
7  
8 2015;15:350.  
9  
10  
11 102 Lee MH. Breast cancer screening behavior in Korean immigrant women in the United  
12  
13 States 2017.  
14  
15  
16 103 Noh H. Terminally ill Black elders: Making the choice to receive hospice care 2013.  
17  
18 104 Chafe R. The Value of Qualitative Description in Health Services and Policy Research.  
19  
20 *Healthcare Policy* 2017;22(3):12–18 (accessed 4 Mar 2020).  
21  
22  
23 105 Ritchie H, Roser M. Age Structure 2019. Available at: [https://ourworldindata.org/age-](https://ourworldindata.org/age-structure#)  
24  
25 [structure#](https://ourworldindata.org/age-structure#) Accessed March 02, 2020.  
26  
27  
28 106 Institute of Medicine. Retooling for an aging America: Building the health care workforce.  
29  
30 Washington D.C.: National Academies Press 2008.  
31  
32 107 Flick U, Kardorff Ev, Steinke I. What is Qualitative Research? And Introduction to the  
33  
34 Field. In: Flick U, Kardorff Ev, Steinke I, eds. A companion to qualitative research.  
35  
36 London: SAGE 2010:1–12.  
37  
38  
39  
40  
41  
42  
43  
44  
45  
46  
47  
48  
49  
50  
51  
52  
53  
54  
55  
56  
57  
58  
59  
60

1  
2  
3  
4  
5  
6  
7  
8  
9  
10  
11  
12  
13  
14  
15  
16  
17  
18  
19  
20  
21  
22  
23  
24  
25  
26  
27  
28  
29  
30  
31  
32  
33  
34  
35  
36  
37  
38  
39  
40  
41

Contextual characteristics

Individual characteristics

Health Behaviors

Outcomes

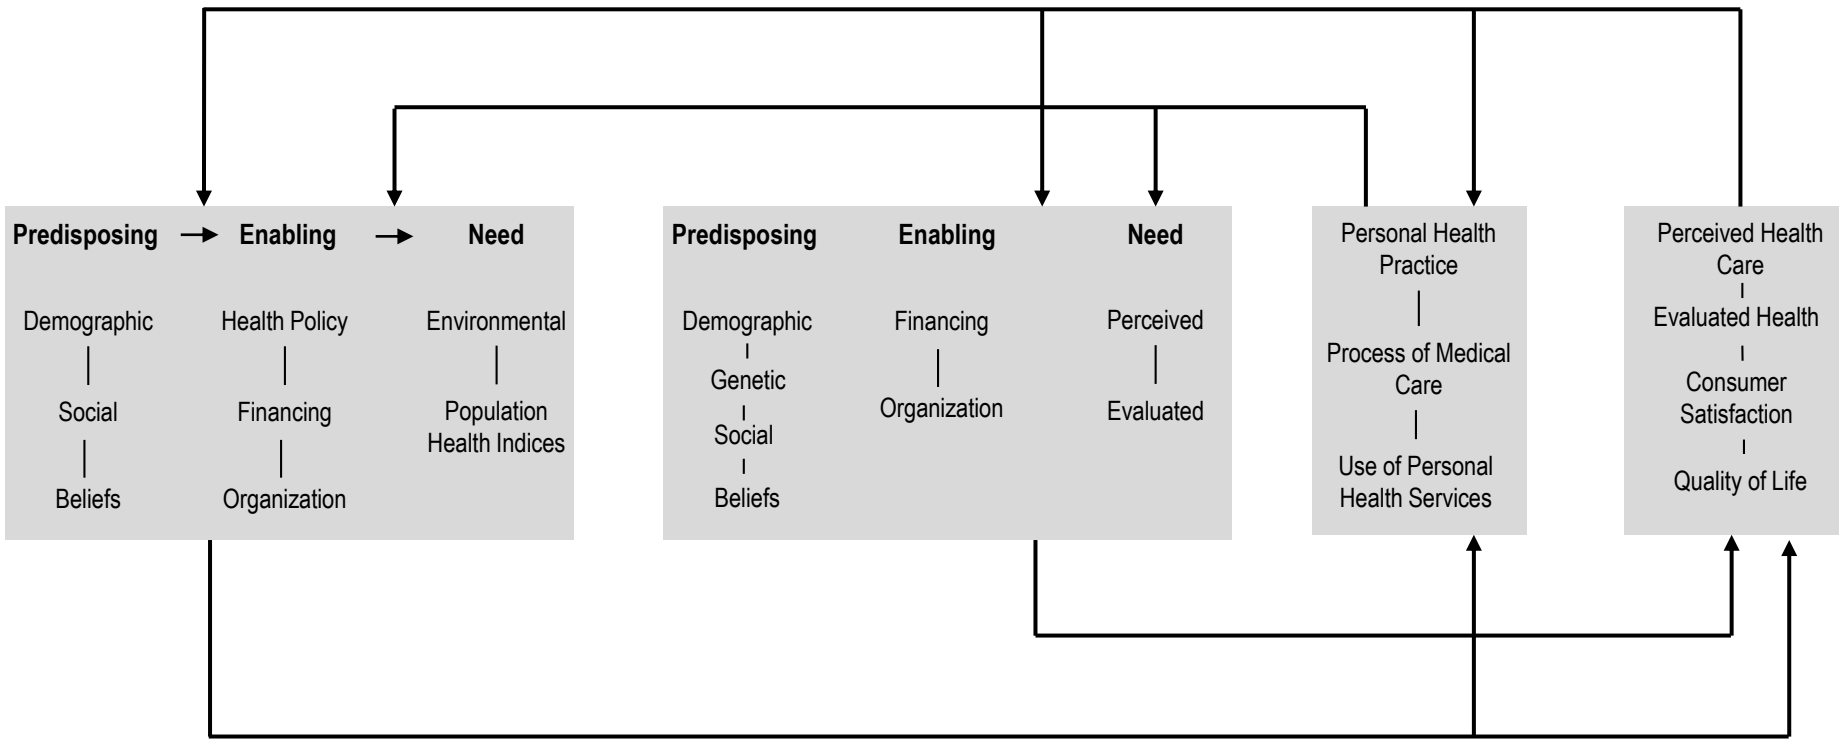

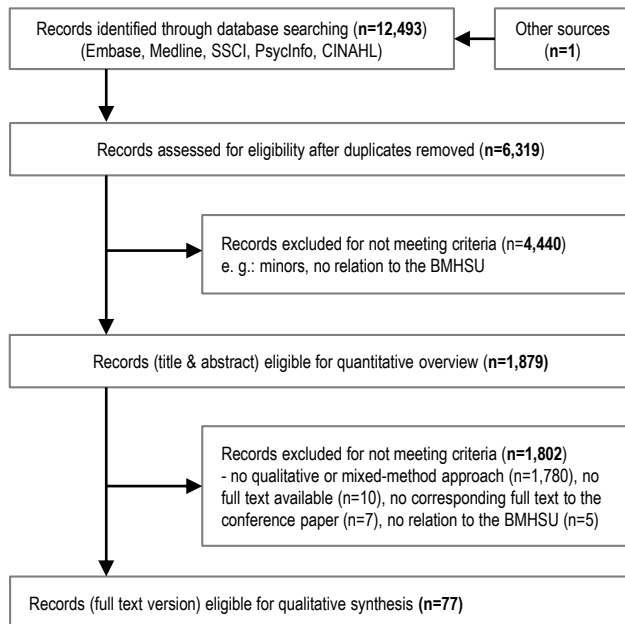

## Preferred Reporting Items for Systematic reviews and Meta-Analyses extension for Scoping Reviews (PRISMA-ScR) Checklist

| SECTION                                               | ITEM | PRISMA-ScR CHECKLIST ITEM                                                                                                                                                                                                                                                                                  | REPORTED ON PAGE # |
|-------------------------------------------------------|------|------------------------------------------------------------------------------------------------------------------------------------------------------------------------------------------------------------------------------------------------------------------------------------------------------------|--------------------|
| <b>TITLE</b>                                          |      |                                                                                                                                                                                                                                                                                                            |                    |
| Title                                                 | 1    | Identify the report as a scoping review.                                                                                                                                                                                                                                                                   | 1                  |
| <b>ABSTRACT</b>                                       |      |                                                                                                                                                                                                                                                                                                            |                    |
| Structured summary                                    | 2    | Provide a structured summary that includes (as applicable): background, objectives, eligibility criteria, sources of evidence, charting methods, results, and conclusions that relate to the review questions and objectives.                                                                              | 2                  |
| <b>INTRODUCTION</b>                                   |      |                                                                                                                                                                                                                                                                                                            |                    |
| Rationale                                             | 3    | Describe the rationale for the review in the context of what is already known. Explain why the review questions/objectives lend themselves to a scoping review approach.                                                                                                                                   | 3-5                |
| Objectives                                            | 4    | Provide an explicit statement of the questions and objectives being addressed with reference to their key elements (e.g., population or participants, concepts, and context) or other relevant key elements used to conceptualize the review questions and/or objectives.                                  | 5                  |
| <b>METHODS</b>                                        |      |                                                                                                                                                                                                                                                                                                            |                    |
| Protocol and registration                             | 5    | Indicate whether a review protocol exists; state if and where it can be accessed (e.g., a Web address); and if available, provide registration information, including the registration number.                                                                                                             | 6                  |
| Eligibility criteria                                  | 6    | Specify characteristics of the sources of evidence used as eligibility criteria (e.g., years considered, language, and publication status), and provide a rationale.                                                                                                                                       | 7                  |
| Information sources*                                  | 7    | Describe all information sources in the search (e.g., databases with dates of coverage and contact with authors to identify additional sources), as well as the date the most recent search was executed.                                                                                                  | 6                  |
| Search                                                | 8    | Present the full electronic search strategy for at least 1 database, including any limits used, such that it could be repeated.                                                                                                                                                                            | Additional file 2  |
| Selection of sources of evidence†                     | 9    | State the process for selecting sources of evidence (i.e., screening and eligibility) included in the scoping review.                                                                                                                                                                                      | 6,7                |
| Data charting process‡                                | 10   | Describe the methods of charting data from the included sources of evidence (e.g., calibrated forms or forms that have been tested by the team before their use, and whether data charting was done independently or in duplicate) and any processes for obtaining and confirming data from investigators. | 7,8                |
| Data items                                            | 11   | List and define all variables for which data were sought and any assumptions and simplifications made.                                                                                                                                                                                                     | 6,7                |
| Critical appraisal of individual sources of evidence§ | 12   | If done, provide a rationale for conducting a critical appraisal of included sources of evidence; describe the methods used and how this information was used in any data synthesis (if appropriate).                                                                                                      | 7                  |

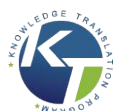

| SECTION                                       | ITEM | PRISMA-ScR CHECKLIST ITEM                                                                                                                                                                       | REPORTED ON PAGE # |
|-----------------------------------------------|------|-------------------------------------------------------------------------------------------------------------------------------------------------------------------------------------------------|--------------------|
| Synthesis of results                          | 13   | Describe the methods of handling and summarizing the data that were charted.                                                                                                                    | 8                  |
| <b>RESULTS</b>                                |      |                                                                                                                                                                                                 |                    |
| Selection of sources of evidence              | 14   | Give numbers of sources of evidence screened, assessed for eligibility, and included in the review, with reasons for exclusions at each stage, ideally using a flow diagram.                    | 8,9 and figure 2   |
| Characteristics of sources of evidence        | 15   | For each source of evidence, present characteristics for which data were charted and provide the citations.                                                                                     | 9                  |
| Critical appraisal within sources of evidence | 16   | If done, present data on critical appraisal of included sources of evidence (see item 12).                                                                                                      | 17                 |
| Results of individual sources of evidence     | 17   | For each included source of evidence, present the relevant data that were charted that relate to the review questions and objectives.                                                           | 13; 15-16          |
| Synthesis of results                          | 18   | Summarize and/or present the charting results as they relate to the review questions and objectives.                                                                                            | 8-17               |
| <b>DISCUSSION</b>                             |      |                                                                                                                                                                                                 |                    |
| Summary of evidence                           | 19   | Summarize the main results (including an overview of concepts, themes, and types of evidence available), link to the review questions and objectives, and consider the relevance to key groups. | 17                 |
| Limitations                                   | 20   | Discuss the limitations of the scoping review process.                                                                                                                                          | 19                 |
| Conclusions                                   | 21   | Provide a general interpretation of the results with respect to the review questions and objectives, as well as potential implications and/or next steps.                                       | 19, 20             |
| <b>FUNDING</b>                                |      |                                                                                                                                                                                                 |                    |
| Funding                                       | 22   | Describe sources of funding for the included sources of evidence, as well as sources of funding for the scoping review. Describe the role of the funders of the scoping review.                 | 20                 |

JBI = Joanna Briggs Institute; PRISMA-ScR = Preferred Reporting Items for Systematic reviews and Meta-Analyses extension for Scoping Reviews.

\* Where *sources of evidence* (see second footnote) are compiled from, such as bibliographic databases, social media platforms, and Web sites.

† A more inclusive/heterogeneous term used to account for the different types of evidence or data sources (e.g., quantitative and/or qualitative research, expert opinion, and policy documents) that may be eligible in a scoping review as opposed to only studies. This is not to be confused with *information sources* (see first footnote).

‡ The frameworks by Arksey and O'Malley (6) and Levac and colleagues (7) and the JBI guidance (4, 5) refer to the process of data extraction in a scoping review as data charting.

§ The process of systematically examining research evidence to assess its validity, results, and relevance before using it to inform a decision. This term is used for items 12 and 19 instead of "risk of bias" (which is more applicable to systematic reviews of interventions) to include and acknowledge the various sources of evidence that may be used in a scoping review (e.g., quantitative and/or qualitative research, expert opinion, and policy document).

From: Tricco AC, Lillie E, Zarin W, O'Brien KK, Colquhoun H, Levac D, et al. PRISMA Extension for Scoping Reviews (PRISMA-ScR): Checklist and Explanation. *Ann Intern Med.* 2018;169:467–473. doi: 10.7326/M18-0850.

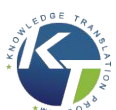

St. Michael's

Inspired Care.  
Inspiring Science.

For peer review only - <http://bmjopen.bmj.com/site/about/guidelines.xhtml>



## Additional file 1: Exemplary search strategy

| <b>Exemplary search strategy – Medline via Pubmed</b> |                                                                        |
|-------------------------------------------------------|------------------------------------------------------------------------|
| #1                                                    | "Andersen RM" [Author]                                                 |
| #2                                                    | "Andersen R" [Author]                                                  |
| #3                                                    | #1 OR #2                                                               |
| #4                                                    | "Andersen model"                                                       |
| #5                                                    | "Andersen's model"                                                     |
| #6                                                    | #4 OR #5                                                               |
| #7                                                    | "Behavioral Model of Health Services Use"                              |
| #8                                                    | "Behavioural Model of Health Services Use"                             |
| #9                                                    | #7 OR #8                                                               |
| #10                                                   | andersen*                                                              |
| #11                                                   | "behavior model"                                                       |
| #12                                                   | "behaviour model"                                                      |
| #13                                                   | "behavioral model"                                                     |
| #14                                                   | "behavioural model"                                                    |
| #15                                                   | (#11 OR #12 OR #13 OR #14) AND #10                                     |
| #16                                                   | "health model"                                                         |
| #17                                                   | #16 AND #10                                                            |
| #18                                                   | utilization                                                            |
| #19                                                   | utilisation                                                            |
| #20                                                   | "Facilities and Services Utilization"[Mesh]                            |
| #21                                                   | "Patient Acceptance of Health Care"[Mesh]                              |
| #22                                                   | model                                                                  |
| #23                                                   | (#18 OR #19 OR #20 OR #21) AND #22 AND #10                             |
| #24                                                   | aday*                                                                  |
| #25                                                   | davidson*                                                              |
| #26                                                   | newman*                                                                |
| #27                                                   | gelberg*                                                               |
| #28                                                   | (#22 OR #23 OR #24 OR #25) AND #10                                     |
| #29                                                   | predisposing                                                           |
| #30                                                   | enabling                                                               |
| #31                                                   | need                                                                   |
| #32                                                   | #27 AND #28 AND #29                                                    |
| #33                                                   | (#27 OR #28 OR #29) AND #10                                            |
| #34                                                   | "andersen framework"                                                   |
| #35                                                   | "Behavioral Model for Vulnerable Populations"                          |
| #36                                                   | #3 OR #6 OR #9 OR #15 OR #17 OR #23 OR #28 OR #32 OR #33 OR #34 OR #35 |
| #37                                                   | animals                                                                |
| #38                                                   | #36 NOT #37                                                            |
| #39                                                   | #36 NOT #37 Filters: Publication date from 1968/01/01 to 2019/04/09    |

Additional file 3: Characteristics of publications with qualitative study design

| Author & year of publication       | Country   | Method |    | Care Setting                           | Target group of interest                        | Disease of interest           | Document type | Survey | Respondents | N   | Application of the Andersen model       |              |
|------------------------------------|-----------|--------|----|----------------------------------------|-------------------------------------------------|-------------------------------|---------------|--------|-------------|-----|-----------------------------------------|--------------|
| Chao et al. 2020 [1]               | USA       | mm     | CA | Mental health services                 | Migrants; elderly individuals                   | Mental disorder               | A             | I      | TG          | 14  | A&A1974                                 | DC; DA       |
| Due et al. 2020 [2]                | Australia | ql     | CA | Oral health services                   | Migrants                                        | No specific disease           | A             | I      | TG, HP      | 26  | R-BMHSU1995                             | Theo; DC; DA |
| Isaak et al. 2020 [3]              | Canada    | ql     | GT | Mental health services                 | Racial and ethnic minorities                    | Mental disorder               | A             | I, FG  | TG          | 115 | BMHSU, R-BMHSU1995, A&N1973, A&D&B 2013 | Theo; DA     |
| Shewamene et al. 2020 [4]          | Australia | mm     | CA | Complementary and alternative medicine | Women; migrants                                 | Maternal and perinatal health | A             | I      | TG          | 15  | BMHSU                                   | Theo         |
| Travers et al. 2020 [5]            | USA       | ql     | CA | Long-term care                         | Elderly individuals                             | No specific disease           | A             | I      | TG          | 470 | Ex-BMPF2002                             | Theo; DA     |
| Bascur-Castillo et al. 2019 [6]    | Chile     | ql     | P  | Urologic disease treatment             | Women                                           | Urologic diseases             | A             | I      | TG          | 10  | R-BMHSU1995                             | Theo; DA     |
| Briones-Vozmediano et al. 2019 [7] | Spain     | ql     | CA | General health care                    | Migrants                                        | Violence experience           | A             | I      | HP          | 28  | A&A1974                                 | DA           |
| Coleman 2019 [8]                   | USA       | ql     | P  | Mental health services                 | Migrants; men; individuals with mental disorder | Mental disorder               | D             | I      | TG          | 66  | BMHSU, R-BMHSU1995, A&N1973             | Theo         |
| Fleury et al. 2019 [9]             | Canada    | mm     | -  | Mental health services                 | Individuals with mental disorder                | Mental disorder               | A             | I      | TG          | 328 | R-BMHSU1995                             | Theo; DC; DA |
| Green et al. 2019 [10]             | USA       | ql     | CA | General health care                    | Men; individuals with HIV                       | HIV                           | A             | I      | TG          | 10  | BMHSU, R-BMHSU1995                      | DA           |
| Heidari et al. [11]                | Iran      | ql     | CA | Medication use                         | Individuals with arthritis                      | Arthritis                     | A             | I      | HP          | 47  | BMHSU2008                               | DC; DA       |
| Koche et al. 2019 [12]             | Nigeria   | ql     | -  | General health care                    | General population                              | No specific disease           | A             | I      | TG          | 24  | R-BMHSU1995, A&A1974, A&D2001, A&N2005  | DA           |
| Navarro-Millan et al. 2019 [13]    | UK        | ql     | -  | E-health                               | Individuals with specific disease               | Rheumatoid arthritis          | A             | FG     | TG          | 31  | A&N1973                                 | DC; DA       |
| Opoku et al. 2019 [14]             | Ghana     | ql     | CA | E-health                               | Individuals with non-communicable disease       | Non-communicable disease      | A             | I      | HP          | 13  | mhealth PNE                             | DA           |
| Perry et al. 2019 [15]             | USA       | ql     | TA | Preventive services                    | Individuals with low socio-economic status      | No specific disease           | A             | FG     | TG          | 235 | A&A1974                                 | Theo; DC; DA |
| Roberson et al. 2019 [16]          | USA       | ql     | GT | Natal care                             | Women; migrants, pregnant women                 | Maternal and perinatal health | A             | I      | TG          | 12  | R-BMHSU1995                             | Theo; DC     |
| Robinson et al. 2019 [17]          | UK        | ql     | FA | Oral health services                   | General population                              | Oral diseases                 | A             | FG; I  | TG, HP      | 34  | A&D1997                                 | DA           |

|                            |                 |    |      |                            |                                                        |                     |   |       |        |     |                    |              |
|----------------------------|-----------------|----|------|----------------------------|--------------------------------------------------------|---------------------|---|-------|--------|-----|--------------------|--------------|
| Schatz et al. 2019 [18]    | Uganda          | ql | CA   | STD treatment              | Individuals living in rural areas; elderly individuals | HIV                 | A | I     | TG, HP | 40  | R-BMHSU1995        | DA           |
| Gill et al. 2018 [19]      | UK              | ql | P    | Urologic disease treatment | Individuals with specific disease                      | Urologic diseases   | A | I     | TG     | 12  | R-BMHSU1995        | DA           |
| Grodensky et al. 2018 [20] | USA             | ql | TA   | Health insurance           | Men; individuals with incarceration                    | No specific disease | A | I     | TG     | 20  | BMVP2007           | Theo; DC; DA |
| Ko et al. 2018 [21]        | USA             | ql | CA   | Preventive services        | Women; mothers                                         | Viral Hepatitis     | A | FG    | TG     | 30  | R-BMHSU1995        | DC; DA       |
| Lor et al. 2018 [22]       | USA             | ql | -    | Screening                  | Migrants; women                                        | No specific disease | A | FG    | TG     | 58  | BMVP2000           | DA           |
| Mago et al. 2018 [23]      | Canada          | ql | P, E | Dental care                | Homeless                                               | No specific disease | A | I     | TG     | 25  | BMVP2000           | Theo; DA     |
| Riang'a et al. 2018 [24]   | Kenya           | mm | -    | Natal care                 | (Pregnant) Women; individuals living in rural areas    | No specific disease | A | I     | TG, HP | 64  | A&N1973            | DA           |
| Victor et al. 2018 [25]    | UK              | ql | CA   | General health care        | Elderly individuals; residents in care homes           | No specific disease | A | I     | TG     | 35  | A&N1973            | DC; DA       |
| Bayuo 2017 [26]            | Ghana           | ql | CA   | Outpatient care            | Elderly individuals                                    | No specific disease | A | I     | TG     | 16  | R-BMHSU1995        | Theo; DA     |
| Hawk et al. 2017 [27]      | USA             | ql | CA   | STD treatment              | Individuals with specific disease                      | HIV                 | A | I     | TG, HP | 40  | R-BMHSU1995        | Theo; DC; DA |
| Herrmann et al. 2017 [28]  | Norway; Germany | ql | GT   | General health care        | General population                                     | No specific disease | A | I; O  | TG     | 40  | R-BMHSU1995        | Theo         |
| Lee 2017 [29]              | USA             | mm | GT   | Screening                  | Migrants, women                                        | cancer              | D | I     | TG     | 30  | R-BMHSU1995        | Theo         |
| Levison et al. 2017 [30]   | USA             | ql | E    | STD treatment              | Migrants                                               | HIV                 | A | I     | TG, HP | 51  | BMVP2000           | DC           |
| Parkman et al. 2017 [31]   | UK              | ql | I    | Emergency department       | Individuals with specific disease                      | Addiction           | A | I     | TG     | 30  | R-BMHSU1995, BMHSU | Theo; DA     |
| Rice 2017 [32]             | USA             | ql | P    | Health insurance           | Individuals with incarceration                         | No specific disease | D | I     | TG     | 11  | BMVP2000           | Theo; DC     |
| Rodriguez et al. 2017 [33] | USA             | ql | -    | STD treatment              | Individuals living in rural areas                      | HIV                 | A | I     | HP     | 36  | A&D2001            | DA           |
| Tewari et al. 2017 [34]    | India           | mm | GT   | Mental health care         | Individuals living in rural areas                      | Mental disorders    | A | FG; I | HP     | 78  | R-BMHSU1995        | DA           |
| Velez et al. 2017 [35]     | USA             | ql | GT   | Dental care                | Migrants; women                                        | No specific disease | A | FG    | TG, HP | 103 | BMVP2000           | Theo; DA     |
| White 2017 [36]            | USA             | ql |      | Preventive services        | Men; migrants; young individuals                       | Cancer; CD          | D | I     | TG     | 12  | R-BMHSU1995        | Theo; DA     |
| Henson et al. 2016 [37]    | UK              | ql | CA   | Emergency department       | Individuals with specific disease                      | Cancer              | A | I     | TG, NK | 24  | A&N1973            | Theo; DC; DA |

|                                  |           |    |     |                                                 |                                   |                     |   |       |            |     |                                   |              |
|----------------------------------|-----------|----|-----|-------------------------------------------------|-----------------------------------|---------------------|---|-------|------------|-----|-----------------------------------|--------------|
| Kohno et al. 2016 [38]           | Malaysia  | ql | CA  | General health care                             | Migrants; elderly individuals     | No specific disease | A | FG; I | TG         | 38  | R-BMHSU1995                       | Theo; DA     |
| Maulik et al. 2016 [39]          | India     | mm | TA  | Mental health care                              | Individuals living in rural areas | Mental disorders    | A | FG; I | TG, HP     | 31  | R-BMHSU1995                       | DA           |
| Mukasa 2016 [40]                 | USA       | ql | P   | Natal care                                      | Migrants; women; mothers          | No specific disease | D | I     | TG         | 11  | R-BMHSU1995                       | Theo; DA     |
| Obikunle 2016 [41]               | USA       | ql | P   | Prevention, Screening                           | Women; migrants                   | Cancer              | D | I     | TG         | 14  | R-BMHSU1995                       | Theo; DA     |
| Rachlis et al. 2016 [42]         | Kenya     | ql | -   | Chronic care                                    | Individuals with specific disease | HIV; TB; CD         | A | FG; I | TG, HP, NK | 207 | A&N1973                           | DA           |
| Rachlis et al. 2016 [43]         | Kenya     | ql | CA  | Chronic care                                    | Individuals with specific disease | HIV; TB; CD         | A | FG; I | TG, HP     | 235 | A&N1973                           | DA           |
| Sperber et al. 2016 [44]         | USA       | ql | CA  | Cancer care, health insurance, genomic services | Veterans                          | Cancer              | A | I     | HP         | 58  | Ex-BMPF2002, UM1998               | DC; DA       |
| Thiessen et al. 2016 [45]        | Canada    | ql | CA  | Natal care                                      | (H)P                              | No specific disease | A | I     | HP         | 24  | A&A1974                           | DC; DA       |
| Blanas et al. 2015 [46]          | USA       | ql | GT  | Screening                                       | Migrants                          | Viral Hepatitis     | A | FG    | TG         | 39  | BMVP2000                          | Theo; DC; DA |
| Bradbury-Jones et al. 2015a [47] | UK        | mm | TA  | Natal care                                      | Women                             | No specific disease | A | FG    | HP         | 45  | Ex-BMPF2002, A&D2001              | Theo; DA     |
| Bradbury-Jones et al. 2015b [48] | Scotland  | ql | R&S | Natal care                                      | Women; victims of violence        | No specific disease | A | I     | TG         | 5   | R-BMHSU1995, Ex-BMPF2002, A&D2001 | Theo; DA     |
| Coe et al. 2015 [49]             | USA       | ql | CA  | Medication use                                  | Homeless                          | No specific disease | A | DocA  | TG         | 426 | BMVP2000                          | Theo         |
| Condellius et al. 2015 [50]      | Sweden    | ql | CA  | General health care                             | Elderly individuals               | No specific disease | A | I     | NK         | 14  | A&A1974                           | Theo; DC; DA |
| Conner et al. 2015 [51]          | USA       | ql | P   | End-of-life care                                | Informal caregivers; (H)P         | No specific disease | A | FG    | TG, HP     | 53  | R-BMHSU1995                       | Theo         |
| Holtzman et al. 2015 [52]        | USA       | ql | GT  | STD treatment                                   | Individuals with specific disease | HIV                 | A | I     | TG         | 51  | R-BMHSU1995                       | Theo; DA     |
| Nowgesic 2015 [53]               | Canada    | ql | E   | STD treatment                                   | Indigenous people                 | HIV                 | D | I; O  | TG, HP     | 41  | BMHSU2008                         | DC; DA       |
| Porteous et al. 2015 [54]        | Scotland  | ql | TA  | Self-care                                       | Individuals with specific disease | No specific disease | A | I     | TG         | 24  | R-BMHSU1995, BMHSU2008            | Theo; DC; DA |
| Richards 2015 [55]               | Grenada   | ql | P   | Screening                                       | Women                             | Cancer              | D | I     | TG         | 8   | BMHSU2008                         | Theo; DC; DA |
| Cathers 2014 [56]                | USA       | ql | P   | Outpatient care                                 | (Health) professionals            | Addiction           | D | I     | TG         | 5   | BMVP2000                          | Theo; DA     |
| Serna 2014 [57]                  | USA       | mm | CA  | Dental care                                     | Migrants                          | Oral diseases       | D | I     | TG         | 14  | R-BMHSU1995, BMHSU                | Theo; DC     |
| Artuso et al. 2013[58]           | Australia | ql | TCM | General health care                             | Migrants                          | CD                  | A | FG; I | TG, HP, NK | 21  | R-BMHSU1995                       | Theo         |

|                           |             |    |     |                          |                                                     |                     |   |       |            |     |                                      |              |
|---------------------------|-------------|----|-----|--------------------------|-----------------------------------------------------|---------------------|---|-------|------------|-----|--------------------------------------|--------------|
| Doshi et al. 2013 [59]    | USA         | ql | GT  | Screening                | Men; migrants                                       | HIV                 | A | I     | TG         | 78  | R-BMHSU1995                          | DC; DA       |
| Han et al. 2013 [60]      | USA         | ql | GT  | Prevention, Screening    | Individuals with specific disease                   | Viral Hepatitis     | A | I     | HP         | 20  | A&A1974                              | Theo; DC; DA |
| Majaj et al. 2013 [61]    | Palestine   | ql | -   | General health care      | Women; individuals living in rural areas            | No specific disease | A | I     | TG, HP     | 37  | R-BMHSU1995                          | DC; DA       |
| Noh 2013 [62]             | USA         | ql | CA  | End-of-life-care         | Elderly individuals; migrants                       | No specific disease | A | I     | TG         | 28  | BMVP2000                             | Theo; DC; DA |
| Scott 2013 [63]           | USA         | mm | CA  | Cancer care              | Migrants                                            | Cancer              | D | FG; I | TG, HP, NK | 29  | BMVP2000                             | Theo         |
| Boateng et al. 2012 [64]  | Netherlands | ql | CA  | General health care      | Migrants                                            | No specific disease | A | FG    | TG         | 51  | R-BMHSU1995                          | DC; DA       |
| Callahan 2012 [65]        | USA         | mm | CA  | Cancer care              | Individuals with specific disease                   | Cancer              | D | I     | TG         | 7   | BMVP2000                             | Theo         |
| Dergal 2012 [66]          | Canada      | mm | GT  | Nursing                  | Caregivers                                          | No specific disease | D | I     | TG         | 10  | A&N1973                              | Theo; DA     |
| Chiu 2011 [67]            | USA         | ql | E   | General health care      | Migrants, elderly individuals                       | No specific disease | D | I     | TG         | 18  | R-BMHSU1995                          | Theo; DC     |
| Corboy et al. 2011 [68]   | Australia   | mm | A&S | Mental health care       | Men; individuals living in rural areas              | Cancer              | A | I     | TG, HP     | 12  | R-BMHSU1995                          | DA           |
| Goh 2011 [69]             | Singapore   | mm | P   | Post-acute care services | Elderly individuals                                 | No specific disease | A | I     | TG, HP, NK | 29  | R-BMHSU1995, A&N1973, A&A1974, BMHSU | DA           |
| Chiu 2010 [70]            | USA         | ql | E   | E-health                 | Migrants; caregivers                                | Dementia            | D | I     | TG         | 14  | R-BMHSU1995, A&N1973                 | Theo; DC     |
| Gräßel et al. 2010 [71]   | Germany     | mm | CA  | Caregiver counselling    | Informal caregiver                                  | No specific disease | A | Q     | NK         | 306 | A&N1973                              | Theo; DC; DA |
| Rööst et al. 2009 [72]    | Bolivia     | ql | AI  | Natal care               | Women; survivors of a severe pregnancy complication | No specific disease | A | I     | TG         | 30  | R-BMHSU1995                          | Theo         |
| Andrasik et al. 2008 [73] | USA         | ql | CA  | Screening                | Women; individuals with low socio-economic status   | HIV                 | A | I     | TG         | 35  | R-BMHSU1995                          | Theo; DA     |
| Butler et al. 2008 [74]   | USA         | ql | -   | General health care      | Women; individuals living in rural area             | No specific disease | A | I     | TG         | 8   | R-BMHSU1995                          | Theo; DA     |
| Herrera et al. 2008 [75]  | USA         | mm | -   | Longterm care            | Migrants                                            | No specific disease | A | I     | NK         | 66  | R-BMHSU1995                          | Theo; DC; DA |
| Bradley et al. 2002 [76]  | USA         | ql | GT  | Longterm care            | Women; migrants; elderly individuals                | Mental disorders    | A | FG    | TG         | 96  | R-BMHSU1995                          | Theo         |
| Go et al. 2002 [77]       | Vietnam     | ql | -   | STD treatment            | Women                                               | STD                 | A | I     | TG         | 36  | R-BMHSU1995                          | DC; DA       |

Country – UK: United Kingdom, USA: United States of America

Methods – mm: mixed-method study; ql: qualitative study

Methodological orientation: CA: Content analysis; E: Ethnography; GT: Ground Theory; P: Phenomenology; I: Iterative Categorisation; TA: Thematic analysis; AI: Analytic induction; A&S: Coding & Analysis Auerbach & Silverstein; TCM: Miles and Huberman's conceptual matrix (TCM); R&S: Framework analysis of Ritchie and Spencer; FA: Framework analysis

Disease of interest – TB: tuberculosis; STD: Sexually transmitted diseases

Data collection – I: Interview, FG: Focus group, O: Observation, DocA: Document analysis, Q: Questionnaire

Respondents – TG: target group, HP: Health professionals, NK: next of kin

Document type – A: Article, D: Dissertation

Model – BMHSU: Andersen 1968 [78]; A&N1973: Andersen and Newman's Framework of Viewing Health Services Utilization [79]; A&A1974: Aday and Andersen's Framework for the study of access to medical care [80]; R-BMHSU1995: Andersen 1995 [81]; A&D1997: Ethnicity, aging, and oral health outcomes: a conceptual framework [82]; UM1998: Phillips, Morrison, Andersen & Aday – Utilization Model [83]; BMVP2000: Behavioral Model for Vulnerable Populations [84]; A&D2001: Behavioral Model of Health Services Use including contextual and individual characteristics [85]; Ex-BMPF2002: expanded Andersen model with psychosocial factors in Long-Term Care [76]; A&N2005: Andersen & Newman Individual Determinants of Health Service Utilization; BMVP2007: Stein, Andersen & Gelberg [86]; BMHSU2008 Andersen 2008 [87]; A&D&B 2013: A behavioral model of health services use including contextual and individual characteristics [88]; mhealth PNE framework [89]

Theo: Theoretical background, DC: Data collection, DA: Data analysis

## REFERENCES

- 1 Chao Y.-Y., Seo J.Y., Katigbak C., et al. Utilization of Mental Health Services Among Older Chinese Immigrants in New York City. *Community Ment Health J* 2020.
- 2 Due C., Aldam I., Ziersch A. Understanding oral health help-seeking among Middle Eastern refugees and asylum seekers in Australia: An exploratory study. *Community Dent Oral Epidemiol* 2020.
- 3 Isaak C.A., Mota N., Medved M., et al. Conceptualizations of help-seeking for mental health concerns in First Nations communities in Canada: A comparison of fit with the Andersen Behavioral Model. *Transcult Psychiatry* 2020. <http://tps.sagepub.com/content/by/year>.
- 4 Shewamene Z, Dune T, Smith CA. Use of traditional and complementary medicine for maternal health and wellbeing by African migrant women in Australia: a mixed method study. *BMC Complement Med Ther* 2020;20(1):60.
- 5 Travers J.L., Hirschman K.B., Naylor M.D. Adapting Andersen's expanded behavioral model of health services use to include older adults receiving long-term services and supports. *BMC Geriatr* 2020;20(1):58.
- 6 Bascur-Castillo C, Araneda-Gatica V, Castro-Arias H, et al. Determinants in the process of seeking help for urinary incontinence in the Chilean health system. *Int J Gynaecol Obstet* 2019;144(1):103–11.
- 7 Briones-Vozmediano E., Castellanos-Torres E., Goicolea I., et al. Challenges to Detecting and Addressing Intimate Partner Violence Among Roma Women in Spain: Perspectives of Primary Care Providers. *J Interpers Violence* 2019;886260519872299.
- 8 Coleman TM. Help-seeking experiences of African American men with depression 2019.
- 9 Fleury M.-J., Grenier G., Farand L., et al. Reasons for Emergency Department Use among Patients with Mental Disorders. *Psychiatr Q* 2019;90(4):703–16. <http://www.wkap.nl/journalhome.htm/0033-2720>.
- 10 Green D.C., Wheeler E.M. A Qualitative Exploration of Facilitators for Health Service Use among Aging Gay Men Living with HIV. *J. Int. Assoc. Providers AIDS Care* 2019;18. <http://jia.sagepub.com/content/by/year>.
- 11 Heidari P., Cross W., Weller C., et al. Rheumatologists' insight into medication adherence in patients with rheumatoid arthritis: A qualitative study. *Int. J. Rheum. Dis.* 2019;22(9):1695–705. [http://onlinelibrary.wiley.com/journal/10.1111/\(ISSN\)1756-185X](http://onlinelibrary.wiley.com/journal/10.1111/(ISSN)1756-185X).
- 12 Koce F, Randhawa G, Ochieng B. Understanding healthcare self-referral in Nigeria from the service users' perspective: a qualitative study of Niger state. *BMC Health Serv Res* 2019;19(1):209.

- 1  
2  
3 13 Navarro-Millan I, Zinski A, Shurbaji S, et al. Perspectives of Rheumatoid Arthritis Patients on Electronic Communication and Patient-Reported Outcome Data Collection: A Qualitative Study. *Arthritis Care and Research* 2019;71(1):80–87.
- 4  
5 14 Opoku D, Busse R, Quentin W. Achieving Sustainability and Scale-Up of Mobile Health Noncommunicable Disease Interventions in Sub-Saharan Africa: Views of Policy Makers in Ghana. *JMIR Mhealth Uhealth* 2019;7(5):e11497.
- 6  
7 15 Perry R, Gard Read J, Chandler C, et al. Understanding Participants' Perceptions of Access to and Satisfaction With Chronic Disease Prevention Programs. *Health Educ Behav* 2019;1090198118822710.
- 8  
9 16 Roberson M.C. Refusal of epidural anesthesia for labor pain management by African American parturients: An examination of factors. *AANA J.* 2019;87(4):299–304.  
10 <https://www.aana.com/publications/aana-journal>.
- 11 17 Robinson P.G., Douglas G.V.A., Gibson B.J., et al. Remuneration of primary dental care in England: A qualitative framework analysis of perspectives of a new service delivery model incorporating incentives for improved access, quality and health outcomes. *BMJ Open* 2019;9(10):e031886. <http://bmjopen.bmj.com/content/early/by/section>.
- 12  
13 18 Schatz E, Seeley J, Negin J, et al. "For us here, we remind ourselves": strategies and barriers to ART access and adherence among older Ugandans. *BMC Public Health* 2019;19(1):131.
- 14  
15 19 Gill P, Logan K, John B, et al. Participants' experiences of ketamine bladder syndrome: A qualitative study. *International Journal of Urological Nursing* 2018;12(2/3):76–83. <http://www.redi-bw.de/db/ebSCO.php/search.ebscohost.com/login.aspx%3fdirect%3dtrue%26db%3dcin20%26AN%3d132481296%26site%3dehost-live>.
- 16  
17 20 Grodensky CA, Rosen DL, Blue CM, et al. Medicaid Enrollment among Prison Inmates in a Non-expansion State: Exploring Predisposing, Enabling, and Need Factors Related to Enrollment Pre-incarceration and Post-Release. *Journal of urban health: bulletin of the New York Academy of Medicine* 2018;95(4):454–66.
- 18  
19 21 Ko LK, Taylor VM, Mohamed FB, et al. "We brought our culture here with us": A qualitative study of perceptions of HPV vaccine and vaccine uptake among East African immigrant mothers. *Papillomavirus Res* 2018;7:21–25.
- 20  
21 22 Lor B, Ornelas IJ, Magarati M, et al. We Should Know Ourselves: Burmese and Bhutanese Refugee Women's Perspectives on Cervical Cancer Screening. *J Health Care Poor Underserved* 2018;29(3):881–97.
- 22  
23 23 Mago A, MacEntee MI, Brondani M, et al. Anxiety and anger of homeless people coping with dental care. *Community Dent Oral Epidemiol* 2018;46(3):225–30.
- 24  
25 24 Rianga'a RM, Nangulu AK, Broerse JEW. "I should have started earlier, but I was not feeling ill!" Perceptions of Kalenjin women on antenatal care and its implications on initial access and differentials in patterns of antenatal care utilization in rural Uasin Gishu County Kenya. *PLoS ONE* 2018;13(10):e0202895.
- 26  
27 25 Victor C, Davies S, Dickinson A, et al. "It just happens". Care home residents' experiences and expectations of accessing GP care. *Arch Gerontol Geriatr* 2018;79:97–103.
- 28  
29 26 Bayuo J. Experiences with out-patient hospital service utilisation among older persons in the Asante Akyem North District- Ghana. *BMC Health Serv Res* 2017;17(1):652.
- 30  
31 27 Hawk M, Coulter RWS, Egan JE, et al. Exploring the Healthcare Environment and Associations with Clinical Outcomes of People Living with HIV/AIDS. *AIDS Patient Care STDS* 2017;31(12):495–503.
- 32  
33 28 Herrmann WJ, Haarmann A, Bærheim A. A sequential model for the structure of health care utilization. *PLoS ONE* 2017;12(5):e0176657.
- 34  
35 29 Lee MH. Breast cancer screening behavior in Korean immigrant women in the United States 2017.
- 36  
37 30 Levison JH, Bogart LM, Khan IF, et al. "Where It Falls Apart": Barriers to Retention in HIV Care in Latino Immigrants and Migrants. *AIDS Patient Care STDS* 2017;31(9):394–405.
- 38  
39 31 Parkman T, Neale J, Day E, et al. Qualitative exploration of why people repeatedly attend emergency departments for alcohol-related reasons. *BMC Health Serv Res* 2017;17(1):140.
- 40  
41 32 Rice MB. Attitudes of women offenders towards medicaid enrollment and coverage under the Affordable Care Act 2017.
- 42  
43 33 Rodriguez HR, Dobalian A. Provider and Administrator Experiences With Providing HIV Treatment and Prevention Services in Rural Areas. *AIDS Educ Prev* 2017;29(1):77–91.
- 44  
45 34 Tewari A, Kallakuri S, Devarapalli S, et al. Process evaluation of the systematic medical appraisal, referral and treatment (SMART) mental health project in rural India. *BMC Psychiatry* 2017;17(1):385.
- 46  
35 35 Velez D, Palomo-Zerfas A, Nunez-Alvarez A, et al. Facilitators and Barriers to Dental Care Among Mexican Migrant Women and Their Families in North San Diego County. *J Immigr Minor Health* 2017;19(5):1216–26.

- 1  
2  
3 36 White AW. The role of social and cultural factors on preventive health service use among young, rural, African American men: A narrative inquiry 2017.
- 4 37 Henson LA, Higginson IJ, Daveson BA, et al. 'I'll be in a safe place': a qualitative study of the decisions taken by people with advanced cancer to seek emergency department care. *BMJ Open* 2016;6(11).  
5  
6 <http://gateway.webofknowledge.com/gateway/Gateway.cgi?GWVersion=2&SrcAuth=SwissAcademicSoftware&SrcApp=Citavi&DestLinkType=FullRecord&DestApp=WOS&KeyUT=000391303400076>.
- 7  
8 38 Kohno A, Nik Farid ND, Musa G, et al. Factors affecting Japanese retirees' healthcare service utilisation in Malaysia: a qualitative study. *BMJ Open* 2016;6(3):e010668.
- 9 39 Maulik PK, Tewari A, Devarapalli S, et al. The Systematic Medical Appraisal, Referral and Treatment (SMART) Mental Health Project: Development and Testing of Electronic Decision Support System and Formative Research to Understand Perceptions about Mental Health in Rural India. *PLoS ONE* 2016;11(10):e0164404.
- 10  
11 40 Mukasa B. Maternal and child health access disparities among recent African immigrants in the United States 2016.
- 12 41 Obikunle AF. Barriers to breast cancer prevention and screening among African American women 2016.
- 13 42 Rachlis B, Naanyu V, Wachira J, et al. Community Perceptions of Community Health Workers (CHWs) and Their Roles in Management for HIV, Tuberculosis and Hypertension in Western Kenya. *PLoS ONE* 2016;11(2):e0149412.
- 14  
15 43 Rachlis B, Naanyu V, Wachira J, et al. Identifying common barriers and facilitators to linkage and retention in chronic disease care in western Kenya. *BMC Public Health* 2016;16:741.
- 16 44 Sperber NR, Andrews SM, Voils CI, et al. Barriers and Facilitators to Adoption of Genomic Services for Colorectal Care within the Veterans Health Administration. *J Pers Med* 2016;6(2).
- 17 45 Thiessen K, Heaman M, Mignone J, et al. Barriers and facilitators related to implementation of regulated midwifery in Manitoba: a case study. *BMC Health Serv Res* 2016;16:1–22.  
18 <http://www.redi-bw.de/db/ebSCO.php/search.ebscohost.com/login.aspx?fdirect%3dtrue%26db%3dcin20%26AN%3d113906425%26site%3dehost-live>.
- 19 46 Blanas DA, Nichols K, Bekele M, et al. Adapting the Andersen model to a francophone West African immigrant population: hepatitis B screening and linkage to care in New York City. *J Community Health* 2015;40(1):175–84.
- 20  
21 47 Bradbury-Jones C, Breckenridge JP, Devaney J, et al. Priorities and strategies for improving disabled women's access to maternity services when they are affected by domestic abuse: a multi-method study using concept maps. *BMC Pregnancy Childbirth* 2015;15:350.
- 22 48 Bradbury-Jones C, Breckenridge JP, Devaney J, et al. Disabled women's experiences of accessing and utilising maternity services when they are affected by domestic abuse: a critical incident technique study. *BMC Pregnancy Childbirth* 2015;15:181.
- 23  
24 49 Coe AB, Moczygamba LR, Gatewood SBS, et al. Medication adherence challenges among patients experiencing homelessness in a behavioral health clinic. *Res Social Adm Pharm* 2015;11(3):e110-20.
- 25  
26 50 Condelius A, Andersson M. Exploring access to care among older people in the last phase of life using the behavioural model of health services use: a qualitative study from the perspective of the next of kin of older persons who had died in a nursing home. *BMC Geriatr* 2015;15:138.
- 27  
28 51 Conner NE, Chase SK. Decisions and caregiving: End of life among Blacks from the perspective of informal caregivers and decision makers. *Am J Hosp Palliat Care* 2015;32(4):454–63.  
29 <http://www.redi-bw.de/db/ebSCO.php/search.ebscohost.com/login.aspx?fdirect%3dtrue%26db%3dpsych%26AN%3d2015-21262-013%26site%3dehost-live>.
- 30 52 Holtzman CW, Shea JA, Glanz K, et al. Mapping patient-identified barriers and facilitators to retention in HIV care and antiretroviral therapy adherence to Andersen's Behavioral Model. *AIDS Care* 2015;27(7):817–28.
- 31  
32 53 Nowgesic EF. Antiretroviral Therapy Access, Acceptance and Adherence among Urban Indigenous Peoples Living with HIV in Saskatchewan: The Indigenous Red Ribbon Storytelling Study 2015.
- 33  
34 54 Porteous T, Wyke S, Hannaford P, et al. Self-care behaviour for minor symptoms: can Andersen's Behavioral Model of Health Services Use help us to understand it? *Int J Pharm Pract* 2015;23(1):27–35.
- 35  
36 55 Richards C. Women's experiences with the follow-up system for cervical cancer in a developing country. 76 2015.
- 37  
38  
39  
40  
41  
42  
43  
44  
45  
46



- 1  
2  
3 56 Cathers LA. Exploring substance use disorders community outpatient counselors' experiences treating clients with co-occurring medical conditions: An interpretative phenomenological analysis 2014.
- 4  
5 57 Serna CA. Exploring oral health problems in adult hispanic migrant farmworkers: A mixed-methods approach 2014.
- 6 58 Artuso S, Cargo M, Brown A, et al. Factors influencing health care utilisation among Aboriginal cardiac patients in central Australia: a qualitative study. *BMC Health Serv Res* 2013;13:83.
- 7 59 Doshi RK, Malebranche D, Bowleg L, et al. Health care and HIV testing experiences among Black men in the South: implications for "Seek, Test, Treat, and Retain" HIV prevention strategies. *AIDS Patient Care STDS* 2013;27(2):123–33.
- 8  
9 60 Han H, Perumalswami P, Kleinman L, et al. Voices of multi-ethnic providers in NYC: Health care for viral hepatitis. *Hepatology* 2013;Conference 64th Annual Meeting of the American Association for the Study of Liver Diseases The Liver Meeting 2013. Washington, DC United States. Conference Publication:1195A-1196A.  
10 <http://ovidsp.ovid.com/ovidweb.cgi?T=JS&CSC=Y&NEWS=N&PAGE=fulltext&D=emed14&AN=71238042>.
- 11  
12 61 Majaj L, Nassar M, Allegri M. "It's not easy to acknowledge that I'm ill": a qualitative investigation into the health seeking behavior of rural Palestinian women. *BMC Womens Health* 2013;13.  
13 <http://gateway.webofknowledge.com/gateway/Gateway.cgi?GWVersion=2&SrcAuth=SwissAcademicSoftware&SrcApp=Citavi&DestLinkType=FullRecord&DestApp=WOS&KeyUT=000320055000001>.
- 14  
15 62 Noh H. Terminally ill Black elders: Making the choice to receive hospice care 2013.
- 16 63 Scott KL. Delay to treatment for Latinos diagnosed with lung and head-and-neck cancers: Application of the behavioral model for vulnerable populations 2013.
- 17 64 Boateng L, Nicolaou M, Dijkshoorn H, et al. An exploration of the enablers and barriers in access to the Dutch healthcare system among Ghanaians in Amsterdam. *BMC Health Serv Res* 2012;12:75.
- 18  
19 65 Callahan CC. Cancer, vulnerability, and financial quality of life: A mixed methods study 2012.
- 20 66 Dergal J. Family members' use of private companions in nursing homes: A mixed methods study 2012.
- 21 67 Chiu MWY. Psychosocial responses to falling in older Chinese immigrants living in the community 2011.
- 22 68 Corboy D, McDonald J, McLaren S. Barriers to accessing psychosocial support services among men with cancer living in rural Australia: Perceptions of men and health professionals. *Int J Mens Health* 2011;10(2):163–83. <http://www.redi-bw.de/db/ebSCO.php/search.ebscohost.com/login.aspx%3fdirect%3dtrue%26db%3dpsyh%26AN%3d2011-21872-004%26site%3dehost-live>.
- 23  
24 69 Goh SN. Post Acute Care of the Elderly in Singapore What Factors Influence Use of Services? *Asia Pacific Journal of Social Work and Development* 2011;21(1):31–53.  
25 <http://gateway.webofknowledge.com/gateway/Gateway.cgi?GWVersion=2&SrcAuth=SwissAcademicSoftware&SrcApp=Citavi&DestLinkType=FullRecord&DestApp=WOS&KeyUT=000292427400004>.
- 26  
27 70 Chiu TML. Usage and Non-usage Behaviour of eHealth Services Among Chinese Canadians Caring for a Family Member with Dementia 2008.
- 28 71 Gräßel E, Luttenberger K, Trilling A, et al. Counselling for dementia caregivers-predictors for utilization and expected quality from a family caregiver's point of view. *Eur J Ageing* 2010;7(2):111–19.
- 29  
30 72 Röst M, Jonsson C, Liljestrand J, et al. Social differentiation and embodied dispositions: a qualitative study of maternal care-seeking behaviour for near-miss morbidity in Bolivia. *Reprod Health* 2009;6:13.
- 31  
32 73 Andrasik MP, Rose R, Pereira D, et al. Barriers to cervical cancer screening among low-income HIV-positive African American women. *J Health Care Poor Underserved* 2008;19(3):912–25.
- 33 74 Butler C, Kim-Godwin Y, Fox JA. Exploration of health care concerns of Hispanic women in a rural southeastern North Carolina community. *Online Journal of Rural Nursing and Health Care* 2008;8(2):22–32.
- 34  
35 75 Herrera AP, Lee J, Palos G, et al. Cultural influences in the patterns of long-term care use among Mexican American family caregivers. *J Appl Gerontol* 2008;27(2):141–65. <http://www.redi-bw.de/db/ebSCO.php/search.ebscohost.com/login.aspx%3fdirect%3dtrue%26db%3dpsyh%26AN%3d2008-03902-002%26site%3dehost-live>.
- 36  
37 76 Bradley EH, McGraw SA, Curry L, et al. Expanding the Andersen model: the role of psychosocial factors in long-term care use. *Health Services Research* 2002;37(5):1221–42.
- 38 77 Go VF-I, Quan VM, Chung A, et al. Gender gaps, gender traps: sexual identity and vulnerability to sexually transmitted diseases among women in Vietnam. *Soc Sci Med* 2002;55(3):467–81.
- 39  
40  
41  
42  
43  
44  
45  
46

- 1  
2  
3 78 Andersen R. A behavioral model of families' use of health services. Chicago, Ill.: Univ. of Chicago 1968.
- 4 79 Andersen R, Newman JF. Societal and individual determinants of medical care utilization in the United States. *Milbank Mem Fund Q Health Soc* 1973;51(1):95–124.
- 5 80 Aday LA, Andersen R. A framework for the study of access to medical care. *Health Services Research* 1974;9(3):208–20.
- 6 81 Andersen RM. Revisiting the Behavioral Model and Access to Medical Care: Does it Matter? *J Health Soc Behav* 1995;36(1):1–10.
- 7 82 Andersen RM, Davidson PL. Ethnicity, aging, and oral health outcomes: a conceptual framework. *Adv Dent Res* 1997;11(2):203–09.
- 8 83 Phillips KA, Morrison KR, Andersen R, et al. Understanding the context of healthcare utilization: assessing environmental and provider-related variables in the behavioral model of utilization. *Health Services Research* 1998;33(3):571–96.
- 9  
10 84 Gelberg L, Andersen RM, Leake B. The Behavioral Model for Vulnerable Populations: Application to Medical Care Use and Outcomes for Homeless People. *Health Services Research*  
11 2000;34(6) (accessed 13 Sep 2018).
- 12 85 Andersen RM, Davidson PL. Improving access to care in America. In: Andersen R, Kominski GF, Rice TH, eds. *Changing the US health care system: Key issues in health services, policy,*  
13 *and management*, 2nd edn. San Francisco: Jossey-Bass 2001:3–31.
- 14 86 Stein JA, Andersen R, Gelberg L. Applying the Gelberg-Andersen behavioral model for vulnerable populations to health services utilization in homeless women. *J Health Psychol*  
15 2007;12(5):791–804.
- 16 87 Andersen RM. National Health Surveys and the Behavioral Model of Health Services Use. *Med Care* 2008;46(7):647–53.
- 17 88 Andersen RM, Davidson PL, Baumeister SE. Improving Acces to Care. In: Kominski GF, ed. *Changing the U.S. health care system: Key issues in health services policy and management*,  
18 4th edn. San Francisco, California: Jossey-Bass 2013:33–69.
- 19 89 Opoku D, Scott P, Quentin W. Healthcare Professionals' Perceptions of the Benefits and Challenges of a Teleconsultation Service in the Amansie-West District of Ghana. *Telemedicine*  
20 *journal and e-health the official journal of the American Telemedicine Association* 2015;21(9):748–55.
- 21  
22  
23  
24  
25  
26  
27  
28  
29  
30  
31  
32  
33  
34  
35  
36  
37  
38  
39  
40  
41  
42  
43  
44  
45  
46

# BMJ Open

## Application of Andersen's Behavioral Model of Health Services Use – A scoping review with a focus on qualitative health services research

|                                 |                                                                                                                                                                                                                                                                   |
|---------------------------------|-------------------------------------------------------------------------------------------------------------------------------------------------------------------------------------------------------------------------------------------------------------------|
| Journal:                        | <i>BMJ Open</i>                                                                                                                                                                                                                                                   |
| Manuscript ID                   | bmjopen-2020-045018.R1                                                                                                                                                                                                                                            |
| Article Type:                   | Original research                                                                                                                                                                                                                                                 |
| Date Submitted by the Author:   | 09-Mar-2021                                                                                                                                                                                                                                                       |
| Complete List of Authors:       | Lederle, Mareike; Pädagogische Hochschule Freiburg, Public Health and Health Education<br>Tempes, Jana; Pädagogische Hochschule Freiburg, Public Health and Health Education<br>Bitzer, Eva; Pädagogische Hochschule Freiburg, Public Health and Health Education |
| <b>Primary Subject Heading</b>: | Public health                                                                                                                                                                                                                                                     |
| Secondary Subject Heading:      | Health services research, Qualitative research                                                                                                                                                                                                                    |
| Keywords:                       | Organisation of health services < HEALTH SERVICES ADMINISTRATION & MANAGEMENT, Quality in health care < HEALTH SERVICES ADMINISTRATION & MANAGEMENT, HEALTH SERVICES ADMINISTRATION & MANAGEMENT, PUBLIC HEALTH, QUALITATIVE RESEARCH                             |
|                                 |                                                                                                                                                                                                                                                                   |

SCHOLARONE™  
Manuscripts



I, the Submitting Author has the right to grant and does grant on behalf of all authors of the Work (as defined in the below author licence), an exclusive licence and/or a non-exclusive licence for contributions from authors who are: i) UK Crown employees; ii) where BMJ has agreed a CC-BY licence shall apply, and/or iii) in accordance with the terms applicable for US Federal Government officers or employees acting as part of their official duties; on a worldwide, perpetual, irrevocable, royalty-free basis to BMJ Publishing Group Ltd ("BMJ") its licensees and where the relevant Journal is co-owned by BMJ to the co-owners of the Journal, to publish the Work in this journal and any other BMJ products and to exploit all rights, as set out in our [licence](#).

The Submitting Author accepts and understands that any supply made under these terms is made by BMJ to the Submitting Author unless you are acting as an employee on behalf of your employer or a postgraduate student of an affiliated institution which is paying any applicable article publishing charge ("APC") for Open Access articles. Where the Submitting Author wishes to make the Work available on an Open Access basis (and intends to pay the relevant APC), the terms of reuse of such Open Access shall be governed by a Creative Commons licence – details of these licences and which [Creative Commons](#) licence will apply to this Work are set out in our licence referred to above.

Other than as permitted in any relevant BMJ Author's Self Archiving Policies, I confirm this Work has not been accepted for publication elsewhere, is not being considered for publication elsewhere and does not duplicate material already published. I confirm all authors consent to publication of this Work and authorise the granting of this licence.

1  
2  
3 **Application of Andersen’s Behavioral Model of Health Services Use – A**  
4  
5 **scoping review with a focus on qualitative health services research**  
6  
7

8 Lederle, Mareike\*<sup>1</sup>; Tempes, Jana\*<sup>1</sup>; Bitzer, Eva-Maria <sup>1</sup>  
9

10  
11  
12  
13  
14 \* shared first authorship  
15

16  
17 1 Department of Public Health and Health Education, University of Education Freiburg  
18  
19  
20  
21  
22  
23  
24

25 Corresponding Address:  
26

27  
28 Mareike Lederle  
29

30  
31 University of Education Freiburg  
32

33  
34 Kunzenweg 21  
35

36  
37 79117 Freiburg  
38

39  
40 Germany  
41

42  
43 mareike.lederle@ph-freiburg.de  
44

45  
46 +49 761 682-296  
47

48 **Keywords**  
49

50 Behavioral Model of Health Services Use, health services utilization, enabling factors,  
51  
52 predisposing factors, need factors, scoping review, qualitative research  
53  
54

55  
56 **Word Count: 4,651**  
57  
58  
59  
60

## Abstract

Introduction: Qualitative methods have become integral in health services research, and Andersen's Behavioral Model of Health Services Use (BMHSU) is one of the most commonly employed models of health service utilization. The model focuses on three core factors to explain health care utilization: predisposing, enabling, and need factors. A recent overview of the application of the BMHSU is lacking, particularly regarding its application in qualitative research. Therefore, we provide a) a descriptive overview of the application of the BMHSU in health services research in general and b) a qualitative synthesis on the (un)suitability of the model in qualitative health services research.

Methods: We searched five databases from March to April 2019, and in April 2020. For inclusion, each study had to focus on individuals  $\geq 18$  years of age and to cite the BMHSU, a modified version of the model, or the three core factors that constitute the model, regardless of study design, or publication type. We used MS Excel® to perform descriptive statistics, and applied MAXQDA 2020® as part of a qualitative content analysis.

Results: From a total of 6,319 results, we identified 1,879 publications dealing with the BMHSU. The main methodological approach was quantitative (89%). More than half of the studies are based on the BMHSU from 1995. 77 studies employed a qualitative design, the BMHSU was applied to justify the theoretical background (62%), structure the data collection (40%), and perform data coding (78%). Various publications highlight the usefulness of the BMHSU for qualitative data, while others criticize the model for several reasons (e.g. its lack of cultural or psychosocial factors).

Conclusions: The application of different and older models of health care utilization hinders comparative health services research. Future research should consider quantitative or qualitative study designs and account for the most current and comprehensive model of the BMHSU.

## Article summary

### Strengths and limitations of the study:

This review

- explores the application of the widely adopted Behavioral Model of Health Services Use without limiting the search on target group, care setting, or disease.
- might have missed studies that did not mention the Behavioral Model of Health Services Use, or the three core factors in the title and abstract of the publications.
- gives insights to the application of the Behavioral Model of Health Services Use in qualitative research which have received little attention so far.

### Introduction

Health care utilization refers to the use of the health care system “by persons for the purpose of preventing and curing health problems, promoting maintenance of health and well-being, or obtaining information about one’s health status and prognosis” [1]. A needs-based health care system meets the needs of a person objectively identified by (health) professionals and considers the demands of an individual. If this interaction is successful, overuse, underuse, and misuse of health care systems can be avoided. Otherwise, there is the possibility of compromising the health of an individual and placing burden on the health care system [2]. To avoid overuse, underuse, and misuse of the health care system, it is important to consider the (non-)use of health care services, which is determined by a variety of contextual and individual factors [3]. As a measurable construct, health care service utilization is primarily determined through quantitative surveys. To explore individual demands, qualitative methods can provide important and rich information within the field of health services research [4, 5]. Various models have been developed across a variety of disciplines to explore and predict individuals’ intentions and behaviors as they utilize health care services [6]. In health services research, the

1 Behavioral Model of Health Services Use (BMHSU) is the most frequently cited model of  
2 health care service utilization [6]. The model was developed by R.M. Andersen in 1968, and  
3  
4 was based on a national quantitative survey that aimed to understand families' use of health  
5  
6 services [7, 8]. The model focuses on three core factors to explain health care utilization:  
7  
8 predisposing factors (e.g., age, education), enabling factors (e.g., income, hospital density), and  
9  
10 need factors (e.g., health status) [8].  
11  
12  
13  
14  
15

16 In recent years, Andersen's initial behavioral model has undergone continuous development,  
17  
18 where new focus was placed on various factors [8–10], such as 'consumer satisfaction' in the  
19  
20 1970s [11, 12], and 'health status', 'personal health practice', and 'external environment' in the  
21  
22 1980s [9, 13]. In 1995, Andersen himself reviewed the model and its development and has since  
23  
24 included feedback loops to consider how treatment outcomes affect health behavior [8].  
25  
26 Additional 'contextual and individual characteristics' were added to the model in the 2000s [8].  
27  
28 Some of these further developments were carried out in cooperation with other authors, e.g.,  
29  
30 Andersen and Newman's Framework of Viewing Health Services Utilization [11] or Aday and  
31  
32 Andersen's Framework for the Study of Access to Medical Care [12]. The BMHSU was  
33  
34 modified for specific settings (e.g., complementary and alternative medicine [14]) and for  
35  
36 specific target groups (e.g., the Behavioral Model for Vulnerable Populations for homeless  
37  
38 people [15]). Currently, many versions of the model for different settings or target groups are  
39  
40 available and applied in health services research. The most current and comprehensive model  
41  
42 is the BMHSU of the year 2013 [16] (Figure 1). The main focus of that model is on the factors  
43  
44 that facilitate or impede an individual's access to health care services. According to the model,  
45  
46 access is determined by contextual characteristics, individual characteristics, health behaviors,  
47  
48 and outcomes. Contextual characteristics include circumstances and the environment;  
49  
50 individual characteristics are determined by a person's life circumstances including, for  
51  
52 example, genetics and socialization; health behaviors are an individual's personal practices; and  
53  
54 outcomes are reflected by an individual's health status and consumer satisfaction.  
55  
56  
57  
58  
59  
60



1  
2 [Figure 1 about here]  
3

4  
5 The application of the BMHSU and its different versions has already been examined in several  
6  
7 systematic reviews. These are, for example, reviews focusing on specific diseases [17] or  
8  
9 settings [18]. The most recent systematic review from Babitsch et al. [3] has examined the  
10  
11 application of the BMHSU in general health care, but excludes specific care settings (e.g.,  
12  
13 maternal health), specific target groups (e.g., veterans), and studies that focus on specific  
14  
15 diseases (e.g., HIV) [3]. These reviews considered quantitative studies only, and excluded  
16  
17 qualitative studies, although qualitative methods have become an important and integral part of  
18  
19 health services research, and are useful for recording detailed descriptions and complex issues  
20  
21 in the context of health care utilization and health care services [4, 5]. Even though the BMHSU  
22  
23 is the most frequently cited model of access to health care services [6], an overview of the  
24  
25 development and application of the BMSHU over the last 50 years is lacking, especially in  
26  
27 terms of its application in qualitative research.  
28  
29  
30  
31

32  
33 Primarily we aimed at a review of qualitative applications of the BMHSU. We learned from  
34  
35 exploratory searches that its application in qualitative research will be difficult to find. That  
36  
37 was when we decided to undertake a meticulous screening of titles and abstracts of publications  
38  
39 dealing with the BMHSU, to provide a descriptive overview on study characteristics as a first  
40  
41 step, to learn about the application of the model in general which would help to put the  
42  
43 qualitative findings into perspective. In a second step, we focus on a qualitative synthesis of the  
44  
45 application of the BMHSU in qualitative health service research. Here, we synthesize (1) the  
46  
47 application of different versions of the BMHSU, (2) the (un)suitability of the BMHSU from the  
48  
49 authors' perspective and (3) which factors of the BMHSU were analyzed in publications with  
50  
51 qualitative approach. Further analyses, e.g., the synthesis of the quantitative studies is object of  
52  
53 future publications.  
54  
55  
56  
57  
58  
59  
60

## Methods

This scoping review follows the PRISMA Extension for scoping reviews (PRISMA-ScR) [19] (additional file 1). It exists no review protocol. For study selection, two researchers (ML, JT) independently screened all selected titles and abstracts for relevance. Data extraction from title and abstract was divided between two researchers (ML, JT). One researcher's extraction was verified by the other researcher with extracting data of a 25% random sample and discrepancies were resolved through discussion. For the qualitative synthesis, a 25% random sample from the total number of full-texts was screened and extracted independently by the two researchers (ML, JT), agreement was examined and in case of ambiguity discussed. For the remaining publications, the data extraction was divided between two researchers (ML, JT). Two researchers (ML, JT) coded the material together. Through all these processes, discrepancies were discussed and resolved by a team of reviewers (ML, JT, EMB).

### Patient and public involvement

No patient involved.

### Search strategy

We conducted a systematic literature search in March and April 2019, and performed an updated search in April 2020 using the Embase® via Ovid, Medline® via PubMed, CINAHL® and PsycInfo® via EBSCOhost, and Social Science Citation Index® via Web of Science databases.

We expanded the search strategy of Babitsch et al. [3] inter alia without limitation on the target groups, care settings, and diseases of interest. We adjusted the search terms to the particular databases and combined thesaurus and keywords pertaining to the BMHSU and its three core factors. The detailed search strategy for one database is identified in the supplementary material (additional file 2). The search was conducted for publications published from 1968 to April 2020. Figure 2 shows the study selection process according to the PRISMA statement.

## **Descriptive overview**

### *Study selection*

As an initial first step, title-abstract-screening was performed for all search results. We included all publications focused on adult populations that applied either the BMHSU, a modified version of the model, or all three core factors of the model. No limitations were set for language, study design, or publication type. Studies were excluded if they could not be obtained via electronic access, interlibrary loan, or through contact with the authors.

### *Data extraction*

The following inductively formed characteristics were extracted from the title and abstract of each included study: publication year, first author, region, methodological approach, target group, care setting, and the applied version of the BMHSU. Beyond labelling included studies as quantitative, qualitative, or mixed-methods we undertook no attempt to specify details of the study design, quantify reporting quality or risk of bias. Such a strategy is consistent with scoping reviews [19]. For abstracts with insufficient information regarding our extraction characteristics, we obtained the full-text version of the publications.

### *Data analysis*

We calculated descriptive statistics with MS Excel® for the descriptive overview.

## **Qualitative synthesis**

Based on the data extraction of the descriptive overview, we obtained the full-texts of all publications with a qualitative approach, either specifically or as part of a mixed-method design. Finally, we screened the full-texts of the remaining results and excluded publications with no relation to the BMHSU in the qualitative part (Figure 2).

### *Quality appraisal*

The quality of the qualitative studies and the qualitative part of studies with a mixed-method design was assessed (ML, JT) using the “Critical Appraisal Checklist for Qualitative Research”

1  
2 [20]. The checklist contains ten items that assess the methodological quality of the design, data  
3 collection, and data analysis of the publications. The tool comprises four answer choices: 'Yes',  
4 'No', 'Unclear', and 'Not Applicable'. If there was insufficient information to answer a given  
5 question, the response was recorded as 'Unclear'. We included all studies with qualitative and  
6 mixed-method approach in the qualitative synthesis regardless of the analyzed quality of the  
7 studies.  
8  
9  
10  
11  
12  
13  
14

### 15 16 *Data analysis*

17  
18 For the qualitative synthesis, MAXQDA 2020® software was used [21]. To answer the research  
19 questions, the following deductive codes were coded in the data material: applied version of the  
20 BMHSU, the way in which the model is applied in qualitative studies, the potential for and  
21 limitations of the BMHSU, and the extensions of the BMHSU described by the authors. The  
22 subcode 'potential and limitations of the BMHSU' is based solely on descriptions and  
23 conclusions of the authors of the individual publications. In addition, we considered which of  
24 the BMHSU factors were examined and which were complemented by inductive factors that  
25 emerged from the data material. We distinguished between the three core factors (predisposing  
26 factors, enabling factors, and need factors) and the associated factors (e.g., demographics,  
27 health policy, and perceived need). We recoded all documents with the final coding frame. In  
28 the context of the content-structuring qualitative analysis, the summarizing reduction of the  
29 coding followed the approach detailed by other researchers [22]. The presented results are  
30 structured based on these main categories.  
31  
32  
33  
34  
35  
36  
37  
38  
39  
40  
41  
42  
43  
44  
45  
46  
47  
48

## 49 **Results**

### 50 51 52 **Descriptive overview of the use of the BMHSU in health services research**

53 After removal of duplicates 6,319 records remained of which 1,879 dealt with the BMHSU,  
54 with its three core factors, or a modified version of the model (Figure 2).  
55  
56  
57

58 [Figure 2 about here]  
59  
60

Starting with the initial use of the model in 1973, reception toward the model has increased considerably in recent decades (Table 1). Two-thirds of all identified publications were published in the last ten years (i.e., since 2010), and more than 50% of the publications have been published since 2013. Further, 70% of the publications are from North-America (USA or Canada), followed by Asia (13%) and Europe (9%). The majority are quantitative studies (n=1,680; 89%), while 4% of all records are qualitative studies (n=69) and 3% are reviews (n=61). In all, 30 publications are mixed-method studies (2%) and 39 publications (2%) are theoretical reflections without empirical data. As there are numerous diverse care settings, target groups and diseases of interests, Table 1 presents the three most frequent categories. An overview of the broad range of the characteristics can be found in additional file 3. General health care, as care provided by general practitioners, is the most studied care setting (n=471, n=25%), followed by nursing care (13%, n=237) and mental health services (12%, n=222). About one quarter of all studies deals with individuals aged  $\geq 50$  years (n=481). In addition, 17% of the publications focus on migrants (n=322), and 14% on women (n=256). Half of the publications (n=936) do not account for a specific disease; for 12% (n=229) of all publications, mental disorders represent the most frequently examined diseases of interest.

Table 1: Quantitative description of publications using the Behavioral Model of Health Services Use in health services research

|                                | <b>Descriptive overview</b><br>(n=1,879)<br><i>(based on title &amp; abstract)</i> | <b>Qualitative synthesis</b><br>(n=77)<br><i>(based on full text version)</i> |
|--------------------------------|------------------------------------------------------------------------------------|-------------------------------------------------------------------------------|
|                                | <b>n (%)*</b>                                                                      | <b>n (%)*</b>                                                                 |
| <b>Year</b>                    |                                                                                    |                                                                               |
| 1968-1979                      | 9 (0)                                                                              | 0 (0)                                                                         |
| 1980-1989                      | 38 (2)                                                                             | 0 (0)                                                                         |
| 1990-1999                      | <b>168 (9)</b>                                                                     | 0 (0)                                                                         |
| 2000-2009                      | <b>440 (23)</b>                                                                    | <b>7 (9)</b>                                                                  |
| 2010-2019                      | <b>1,224 (65)</b>                                                                  | <b>70 (91)</b>                                                                |
| <b>Region</b>                  |                                                                                    |                                                                               |
| North-America                  | <b>1,275 (70)</b>                                                                  | <b>43 (56)</b>                                                                |
| Asia                           | <b>244 (13)</b>                                                                    | 6 (8)                                                                         |
| Europe                         | <b>163 (9)</b>                                                                     | <b>14 (18)</b>                                                                |
| Africa                         | 68 (4)                                                                             | <b>12 (16)</b>                                                                |
| South America                  | 49 (3)                                                                             | 2 (3)                                                                         |
| Oceania                        | 29 (2)                                                                             | 5 (6)                                                                         |
| <b>Methodological approach</b> |                                                                                    |                                                                               |
| Quantitative                   | <b>1,680 (89)</b>                                                                  | /                                                                             |
| Qualitative                    | <b>69 (4)</b>                                                                      | 58 (75)                                                                       |
| Review                         | <b>61 (3)</b>                                                                      | /                                                                             |

|                                        |                 |                |
|----------------------------------------|-----------------|----------------|
| Theoretical                            | 39 (2)          | /              |
| Mixed-Method                           | 30 (2)          | 19 (25)        |
| <b>Care Setting<sup>1</sup></b>        |                 |                |
| General health care <sup>2</sup>       | <b>471 (25)</b> | <b>12 (16)</b> |
| Nursing care <sup>3</sup>              | <b>237 (13)</b> | 5 (6)          |
| Mental health services                 | <b>222 (12)</b> | 6 (8)          |
| Screening                              | 107 (6)         | <b>7 (9)</b>   |
| Perinatal care <sup>4</sup>            | 77 (4)          | <b>7 (9)</b>   |
| <b>Target group<sup>1</sup></b>        |                 |                |
| Individuals ≥50 years                  | <b>481 (26)</b> | <b>11 (14)</b> |
| Migrants                               | <b>322 (17)</b> | <b>23 (30)</b> |
| Women                                  | <b>256 (14)</b> | <b>16 (21)</b> |
| <b>Disease of interest<sup>1</sup></b> |                 |                |
| No specific disease                    | <b>936 (50)</b> | <b>27 (35)</b> |
| Mental disorders                       | <b>229 (12)</b> | 7 (9)          |
| Cancer                                 | <b>134 (7)</b>  | <b>9 (12)</b>  |
| HIV                                    | 96 (5)          | <b>11 (14)</b> |

<sup>1</sup> Bold: three most frequent categories

<sup>2</sup> General health care: care provided by general practitioners

<sup>3</sup> Nursing: homecare, long-term care, formal care, care facility, informal care, respite care, institutionalized care & transportation services

<sup>4</sup> Perinatal care: including midwifery services

\* The sum might be less than 100% as only the three most frequent categories are represented in this table. Additional file 3 shows all characteristics.

### Qualitative synthesis of the use of the BMHSU in qualitative health services research

After excluding publications without a qualitative or mixed-method approach (n=1,780), those without a full text available (n=10), those without a corresponding full text to a conference paper (n=7), and those that were not at all related to the BMHSU in the qualitative part (n=5), a total of 77 studies remained and were included in the qualitative synthesis of qualitative studies applying the BMHSU (Figure 2).

Although the first known application of the BMHSU in a qualitative study was from 2002, most of the qualitative records were identified in 2010 and later (91%; n=70; Table 1). Most publications are from North-America, USA or Canada (n=43, 56%), 18% (n=14) are from Europe and 16% (n=12) are from Africa. General health care is the care setting that was explored most often in publications adopting a qualitative study design (n=12, 16%), followed by screening and perinatal care (n=7 each, 9%). Qualitative research applying the BMHSU primarily targets migrants (n=23, 30%), women (n=16, 21%), and individuals aged ≥50 years (n=11, 14%). Further, 35% of qualitative publications (n=27) address no specific disease; if a particular disease was of interest, it is most often HIV (n=11, 14%) or cancer (n=9, 12%).

1  
2 Two-thirds of the qualitative studies use personal interviews as a data collection method (n=51,  
3 81%). The sample size varies between five and 470 participants. Most of the qualitative studies  
4 interview the target group directly (n=65, 84%). Health professionals and/or next of kin  
5 assessments are the sole source of information in 12 studies (16%). In addition, 18 of the 65  
6 qualitative studies that approached the target group obtained further information from health  
7 professionals (n=13), next of kin (n=1), or both (n=4; for further details; additional file 4).  
8  
9  
10  
11  
12  
13  
14

### 15 16 **Application of the different versions of the Andersen model**

17 The BMHSU is applied in the various studies to justify the theoretical background (62%),  
18 structure the data collection (40%), e.g. such as aiding in the development of the interview  
19 guide, and for data coding (78%). More than half of the studies (n=42) [23–62] are based on  
20 the BMHSU from 1995 [9]. Multiple studies (n=11) use the Behavioral Model for Vulnerable  
21 Populations [63–72]. Twelve studies [31, 42, 55, 61, 73–80] employ Andersen and Newman's  
22 Framework of Viewing Health Services Utilization, eight studies [42, 43, 81–86] apply Aday  
23 and Andersen's Framework for the Study of Access to Medical Care, and seven studies [42, 48,  
24 52, 55, 59, 61, 87] are based on the original Behavioral Model of Families' Use of Health  
25 Services from 1968. Individual studies use other models, such as the expanded model from  
26 Bradley et al. [29] (additional file 4).  
27  
28  
29  
30  
31  
32  
33  
34  
35  
36  
37  
38  
39  
40

### 41 **(Un)Suitability of the Andersen model from the authors' perspective**

42 Overall, 29 publications [23, 31–33, 35, 36, 40, 42, 43, 45, 46, 48, 49, 51, 53, 55, 56, 69, 72,  
43 73, 78–80, 83, 88–92] described that the model was suitable in their work, e.g., to obtain and  
44 evaluate qualitative data. Of these, 17 publications [35, 36, 40, 43, 45, 46, 49, 51, 53, 73, 78–  
45 80, 83, 88, 89, 92] highlight the general suitability of the BMSHU for qualitative data:  
46 “Andersen's framework provides a valid, consistent, and unbiased manner in which to code and  
47 classify qualitative data” [89]. Various publications (n=17) [35, 40, 43, 45, 46, 49, 51, 53, 55,  
48 58, 73, 78–80, 88, 89, 93] described how their data can be applied very well to the BMHSU  
49 and its factors. Others described that the strength of the model lies in its consideration of both  
50  
51  
52  
53  
54  
55  
56  
57  
58  
59  
60

1 patient-related and environmental factors [40, 51, 91], and that the model allows for “a more  
2 transparent comparison with findings emerging from other studies“ [88].  
3  
4

5  
6  
7 Some studies (n=11) described the suitability of the BMHSU and additionally criticized some  
8 parts of the model [23, 32, 36, 40, 49, 53, 55, 90, 92–94]. For instance, there are authors (n=8)  
9 who criticized the model, but did not propose changes to its structure [23, 26, 36, 49, 90, 92–  
10 94]. Some studies [23, 26] described that cultural factors are not adequately represented in the  
11 model: “the model has been noted not to be sensitive to the diverse cultural and structural  
12 barriers in healthcare among minority groups” [26]. According to the authors of some  
13 publications [36, 49], the models would need to further elaborate upon the relationship between  
14 the three core factors of the BMHSU and the relevance of each. Other authors claimed that the  
15 model does not cover all factors of health care utilization, such as psychosocial factors [23],  
16 and would be less suitable for studies on HIV [90] or health care coverage [94].  
17  
18  
19  
20  
21  
22  
23  
24  
25  
26  
27  
28  
29

30 Not all critics proposed model modifications, but some of the identified limitations may lead to  
31 modifications of or additions to the BMHSU. Based on their findings, some authors (n=12)  
32 identified additional factors not covered by the model that impact health care utilization [24,  
33 29, 32, 37, 38, 40, 55, 58, 75, 81, 86, 91], such as health literacy [40, 55, 91], or competing  
34 priorities [24, 40] (Table 2). The basic structure of the BMHSU is retained as part of these  
35 expansions.  
36  
37  
38  
39  
40  
41  
42  
43  
44

45 Other studies fundamentally changed the original structure of the BMHSU, both in terms of the  
46 factors [25, 39, 75] and the feedback loops provided [40, 53, 63], ultimately impacting the  
47 influence between each of the factors in the model. Some studies emphasized the distinction  
48 between the three core factors as predisposing and inhibiting factors, and as enabling and  
49 impeding factors [25, 27, 63], while others combined the model with another model [62].  
50  
51  
52  
53  
54  
55  
56  
57  
58  
59  
60



Table 2: Additions to the Behavioral Model of Health Services Use from qualitative health services research

| Contextual characteristics           | Individual characteristics                                                                                               |                                                                 |                 | Health Behaviors                                                                                           | Outcome                                      | Further additions              |                                                    |
|--------------------------------------|--------------------------------------------------------------------------------------------------------------------------|-----------------------------------------------------------------|-----------------|------------------------------------------------------------------------------------------------------------|----------------------------------------------|--------------------------------|----------------------------------------------------|
|                                      | Predisposing factors                                                                                                     | Enabling factors                                                | Need factors    |                                                                                                            |                                              |                                |                                                    |
| Intake & engagement [37]             | Competing priorities [24, 40]                                                                                            | Medication characteristics [40]                                 | Unmet need [32] | Distinction between problem recognition, decision to seek help and decision to use health care system [75] | Dental service use & dental experiences [58] | Psychosocial factors [29]      |                                                    |
| Patient & transition [37]            | Fear [24]                                                                                                                | Reminder strategies [40]                                        |                 |                                                                                                            |                                              |                                |                                                    |
| Medication adherence strategies [37] | (Mis)trust [24, 91]                                                                                                      | Personal emergency alarm system [32]                            |                 |                                                                                                            |                                              |                                |                                                    |
| Billing [37]                         | Previous experiences [24, 91]                                                                                            | Informal care system [32]                                       |                 | Mental health [86]                                                                                         | Avoidant strategies [55]                     | Intended & actual use [29, 58] | Situation and satisfaction of the next of kin [81] |
| Specific program for support [37]    | Contingency plans for future falls [32]                                                                                  | Characteristics at the level of informal caregivers [38]:       |                 |                                                                                                            |                                              |                                |                                                    |
| Health Literacy [37]                 | Health literacy [40, 55, 91]                                                                                             | Physician referral, knowledge about the services, acculturation |                 | Spirituality [55]                                                                                          | Service experience [58]                      | Vulnerability factors [72]     |                                                    |
| Individualized care [37]             | Characteristics at the level of informal caregivers [38]: Familism, perception about services, religiosity, gender roles |                                                                 |                 |                                                                                                            |                                              |                                |                                                    |
| Philosophical approaches [37]        |                                                                                                                          |                                                                 |                 |                                                                                                            |                                              |                                |                                                    |
| Pharmacy services [40]               |                                                                                                                          |                                                                 |                 |                                                                                                            |                                              |                                |                                                    |
| Rheumatologist [91]                  | Conscientiousness [91]                                                                                                   |                                                                 |                 |                                                                                                            |                                              |                                |                                                    |

The table shows the variables as the authors of the original studies assigned them to BMHSU core factors

## Factors of the BMHSU emerging from qualitative health services research

Individual characteristics are considered much more frequently than contextual characteristics, health behaviors, or health outcomes in publications that adopted a qualitative design. Table 3 lists all factors of the BMHSU with the number of publications that used each factor. Although the qualitative studies explored in our research considered a wide range of factors, there are still some other factors of the BMHSU that have not been considered in any of the included publications that featured a qualitative study design (e.g., quality of life as an outcome factor or some predisposing factors as contextual characteristics).

**Contextual characteristics:** A total of 63 qualitative studies (82%) mentioned contextual characteristics, of which enabling factors are most frequently included, such as health professional factors, e.g. soft skills (n=22, 29%) or availability (n=21, 27%).

**Individual characteristics:** The most frequently researched factors pertain to individual characteristics, especially predisposing factors such as social networks (n=41, 53%), attitude towards health care services (n=33, 43%), and values (n=28, 36%). Nearly half of all studies considered accessibility of health care services as an enabling factor (n=34, 44%). The most common need factor was perceived symptoms (n=45, 58%).

**Health Behavior:** In terms of health behavior, the relationship between the patient and provider (n=21, 27%), as well as alternative medicine (n=13, 17%) and self-care (n=11, 14%) were most often analyzed in publications adopting a qualitative design.

**Outcomes:** Overall, about half of the qualitative studies (n=37) mentioned health outcomes in their analyses. Satisfaction with providers (n=18, 23%) and prior experience (n=17, 22%) were the most considered aspects.

During our qualitative syntheses of qualitative health services research studies, health literacy emerged as a inductive category, separated into individual [95] and organizational health literacy [96]. We identified associations with organizational health literacy in 25 studies (32%)

and individual health literacy in 52 studies (68%; Table 3). In the context of organizational health literacy, the focus was on access to health information: “share health risk information while empowering patients to make their own health decisions” [37]. The most frequently mentioned factors among individual health literacy were knowledge (n=39, 51%) and competences (n=22, 29%), as exemplified by the following statement: “knowledge was empowering to make own choices and feel in control of their care decisions” [28].

Table 3: Factors examined in publications

|                            | Factors                                | N                                                                                                                  | References                                                                                                             |
|----------------------------|----------------------------------------|--------------------------------------------------------------------------------------------------------------------|------------------------------------------------------------------------------------------------------------------------|
| Contextual characteristics | <b>Predisposing factors</b>            |                                                                                                                    |                                                                                                                        |
|                            | Demographic                            | 1                                                                                                                  | [92]                                                                                                                   |
|                            | Social                                 | /                                                                                                                  | /                                                                                                                      |
|                            | Beliefs                                |                                                                                                                    |                                                                                                                        |
|                            | Stigma*                                | 14                                                                                                                 | [34, 45, 46, 53, 61, 65, 67, 72, 78, 85, 86, 89, 90, 97]                                                               |
|                            | Culture*                               | 5                                                                                                                  | [24, 41, 45, 47, 78]                                                                                                   |
|                            | Social norms*                          | 5                                                                                                                  | [35, 41, 77, 78, 88]                                                                                                   |
|                            | Gender roles*                          | 3                                                                                                                  | [28, 67, 97]                                                                                                           |
|                            | <b>Enabling factors</b>                |                                                                                                                    |                                                                                                                        |
|                            | Health Policy                          | 7                                                                                                                  | [43, 58, 62, 84, 85, 92, 98]                                                                                           |
|                            | Financing                              | 12                                                                                                                 | [35, 37, 42, 51, 62, 65, 84, 89, 91, 92, 99, 100]                                                                      |
|                            | Organization                           |                                                                                                                    |                                                                                                                        |
|                            | Health professional factors*           | 22                                                                                                                 | [25, 32, 35, 37, 40, 43, 44, 51, 54, 59, 62, 70, 80, 82, 83, 85, 89, 91–93, 98, 101]                                   |
|                            | Availability*                          | 21                                                                                                                 | [24, 25, 29, 34, 40, 42, 43, 48, 51, 54, 60, 62, 65, 75, 81, 88, 91, 93, 98, 100, 102]                                 |
|                            | Additional health care services*       | 12                                                                                                                 | [27, 37, 53, 73, 76, 77, 81, 82, 89, 91, 98, 101]                                                                      |
|                            | Cultural/linguistic suitable services* | 9                                                                                                                  | [24, 32, 38, 41, 63, 67, 72, 85, 86]                                                                                   |
|                            | Cooperation*                           | 5                                                                                                                  | [24, 78, 81, 82, 98]                                                                                                   |
|                            | System complexity*                     | 6                                                                                                                  | [35, 65, 81, 83, 85, 102]                                                                                              |
|                            | Quality of care*                       | 6                                                                                                                  | [27, 35, 43, 60, 81, 91]                                                                                               |
| Interpreters*              | 2                                      | [24, 70]                                                                                                           |                                                                                                                        |
| <b>Need factors</b>        |                                        |                                                                                                                    |                                                                                                                        |
| Environmental              | 3                                      | [51, 90, 92]                                                                                                       |                                                                                                                        |
| Population health indices  | /                                      | /                                                                                                                  |                                                                                                                        |
| Individual characteristics | <b>Predisposing factors</b>            |                                                                                                                    |                                                                                                                        |
|                            | Demographic                            |                                                                                                                    |                                                                                                                        |
|                            | Immigration status*                    | 7                                                                                                                  | [32, 54, 57, 58, 71, 72, 102]                                                                                          |
|                            | Gender                                 | 2                                                                                                                  | [63, 65]                                                                                                               |
|                            | Age                                    | 13                                                                                                                 | [25, 26, 45, 51, 54, 58, 59, 62, 63, 79, 80, 94, 102]                                                                  |
|                            | Genetic                                | 2                                                                                                                  | [47, 98]                                                                                                               |
|                            | Social                                 |                                                                                                                    |                                                                                                                        |
|                            | Social network                         | 41                                                                                                                 | [26, 27, 29–32, 34, 36, 40–43, 48–51, 55, 57–59, 61, 63, 65, 67, 68, 76, 78–83, 85, 86, 88, 90, 93, 94, 100, 102, 103] |
|                            | Personal skills*                       | 16                                                                                                                 | [27, 30, 40, 44, 46, 52, 66–68, 70–72, 76, 78, 82, 86]                                                                 |
|                            | Competing priorities*                  | 12                                                                                                                 | [23–25, 31, 35, 40, 51, 67, 78, 82, 88, 94]                                                                            |
|                            | Living conditions*                     | 10                                                                                                                 | [40, 42, 48, 50, 66, 67, 71, 81, 89, 90]                                                                               |
|                            | Education*                             | 5                                                                                                                  | [48, 58, 62, 88, 91]                                                                                                   |
|                            | Beliefs                                |                                                                                                                    |                                                                                                                        |
|                            | Attitude towards health care services  | 33                                                                                                                 | [24, 27–30, 32, 35, 41–43, 46, 48–51, 53, 60, 62, 64, 75, 78–81, 86, 88, 89, 91, 93, 99, 100, 102, 103]                |
|                            | Fear*                                  | 27                                                                                                                 | [23–25, 35, 36, 40, 41, 47, 50, 51, 53, 57, 61–63, 65, 68, 71, 75, 77–79, 85, 88, 89, 101, 102]                        |
| Values                     | 28                                     | [24, 26, 27, 30, 32, 34, 35, 41, 47, 49, 54, 55, 57, 58, 61, 63, 67, 68, 71, 72, 75, 82, 85, 87, 88, 93, 100, 103] |                                                                                                                        |

|  |                                        |    |                                                                                                                           |
|--|----------------------------------------|----|---------------------------------------------------------------------------------------------------------------------------|
|  | Attitude towards health professionals  | 12 | [28, 33, 38, 44, 46, 48, 49, 61, 77, 88, 99, 102]                                                                         |
|  | <b>Enabling factors</b>                |    |                                                                                                                           |
|  | Financing                              |    |                                                                                                                           |
|  | Financial resources                    | 25 | [23, 26, 29, 42, 43, 49–54, 58, 63, 66, 68, 71, 72, 78, 79, 88, 91, 94, 99, 100]                                          |
|  | Insurance                              | 18 | [23, 30, 35, 40, 44, 46, 52, 54, 64, 65, 71, 72, 88, 91, 93, 94, 102, 103]                                                |
|  | Income                                 | 8  | [29, 30, 54, 65, 71, 88, 93, 103]                                                                                         |
|  | Organization                           |    |                                                                                                                           |
|  | Accessibility*                         | 34 | [23–26, 30, 35, 40, 42, 43, 45, 48, 49, 51, 53, 58, 62, 65, 66, 72, 75, 78, 79, 82, 83, 88–91, 93, 99–103]                |
|  | Stable routine*                        | 6  | [65, 75, 76, 89, 90, 100]                                                                                                 |
|  | Reminder strategies*                   | 3  | [40, 51, 53]                                                                                                              |
|  | Social Support                         |    |                                                                                                                           |
|  | General*                               | 12 | [48, 49, 51, 64, 67, 76, 78, 80, 83, 88, 90, 100]                                                                         |
|  | Tangible                               | 18 | [27, 32, 34, 40, 42, 50, 51, 65, 67, 76, 79, 81, 87, 91, 93, 94, 102, 103]                                                |
|  | Emotional/affectionate                 | 15 | [23, 25, 26, 30, 36, 50, 51, 55, 63, 65, 67, 76, 78, 81, 83]                                                              |
|  | Informational                          | 11 | [23, 26, 41, 43, 68, 76, 79, 82, 87, 90, 93, 100, 103]                                                                    |
|  | <b>Need factors</b>                    |    |                                                                                                                           |
|  | Perceived                              |    |                                                                                                                           |
|  | General*                               | 10 | [31, 32, 34, 59, 65, 74, 79, 87, 93, 103]                                                                                 |
|  | Symptoms                               | 45 | [23–27, 31, 36, 40, 42–44, 47–51, 54, 55, 58–61, 63, 65, 67, 68, 71, 75, 76, 78, 79, 81, 86, 88, 91, 94, 97, 99–101, 103] |
|  | Evaluated                              | 20 | [26, 31, 34, 36, 42, 56, 59, 60, 63, 76, 79–81, 83, 86, 91–93, 100, 103]                                                  |
|  | <b>Health Behaviors</b>                |    |                                                                                                                           |
|  | Personal health practice               |    |                                                                                                                           |
|  | Alternative medicine*                  | 13 | [26, 30, 45, 54, 55, 58, 65, 78, 79, 87, 88, 91, 99]                                                                      |
|  | Self-care                              | 11 | [25, 30, 47, 49, 65, 75, 87, 88, 90, 99, 100]                                                                             |
|  | Adherence                              | 8  | [37, 40, 51, 64, 66, 91, 100, 102]                                                                                        |
|  | Diet                                   | 4  | [48, 49, 65, 87]                                                                                                          |
|  | Process of medical care                |    |                                                                                                                           |
|  | Relationship patient-provider          | 21 | [24, 27, 28, 40, 51, 53, 61, 67, 68, 71, 73, 75, 76, 78, 83, 85, 89–92, 100]                                              |
|  | Second medical opinion*                | 1  | [51]                                                                                                                      |
|  | Use of personal health services        | 77 | [23–55, 57–68, 70–94, 97–103]                                                                                             |
|  | <b>Outcomes</b>                        |    |                                                                                                                           |
|  | Perceived health status                | 5  | [42, 49, 78, 91, 92]                                                                                                      |
|  | Evaluated health status                | 1  | [65]                                                                                                                      |
|  | Consumer satisfaction                  |    |                                                                                                                           |
|  | General*                               | 2  | [83, 92]                                                                                                                  |
|  | Prior experiences*                     | 17 | [23, 24, 26, 28, 46, 48, 52, 56, 58, 68, 72, 75, 81, 83, 97, 99, 100]                                                     |
|  | Waiting time                           | 5  | [23, 43, 46, 83, 88]                                                                                                      |
|  | Satisfaction with providers*           | 18 | [23, 27, 35, 36, 46, 48, 49, 56, 72, 73, 76, 77, 81, 83, 85, 88, 99, 100]                                                 |
|  | Satisfaction with care facility*       | 8  | [30, 38, 42, 60, 79, 83, 94, 100]                                                                                         |
|  | Quality of life                        | /  | /                                                                                                                         |
|  | <b>Organizational Health Literacy*</b> |    |                                                                                                                           |
|  | Access to Health Information*          | 25 | [23–25, 28, 31, 33, 37, 40, 41, 47–50, 70, 75–77, 84, 85, 91, 93, 94, 100]                                                |
|  | <b>Individual Health literacy*</b>     |    |                                                                                                                           |
|  | Literacy*                              | 2  | [62, 100]                                                                                                                 |
|  | Knowledge*                             | 39 | [24, 27–29, 31–38, 41, 43, 45, 47–53, 55, 58, 63, 68, 70, 74–79, 85, 88, 91, 93, 101, 102]                                |
|  | Motivation*                            | 4  | [35, 76, 78, 99]                                                                                                          |
|  | Competences*                           | 22 | [23, 24, 28, 30, 33, 38, 40, 49, 51, 53, 57, 62, 64, 65, 68, 71, 75, 76, 83, 90, 102, 103]                                |

\*These factors were inductive codes, developed along the data material

### **Quality assessment of publications with a qualitative study design**

Of the 77 qualitative studies, four (5%) reported all ten aspects of the critical appraisal checklist for qualitative research [20]. Most qualitative studies (n=69, 90%) reported between five and nine criteria from the checklist, and four studies (5%) reported fewer than five criteria. The two quality criteria that were most frequently fulfilled with 95% each (n=73) are the “congruity between the stated philosophical perspective and the research methodology” and the “congruity between the research methodology and the methods used to collect data” [20]. In contrast, the “influence of the researcher on the research, and vice-versa” [20] is only addressed in nine publications (12%).

### **Discussion**

This scoping review provides a recent overview of the development and application of the BMHSU in very different care settings, across different diseases, and among publications examining different target groups. The BMHSU is mainly used in quantitative studies, but our review also shows the suitability of the model in qualitative research.

#### **Descriptive overview of the use of the BMHSU in health services research**

The general reception toward the BMHSU has increased considerably in recent years, as has the number of publications adopting this model, with most (70%) of all related publications stemming from North-America. This is in line with another review [3], which excluded specific care settings and diseases. The dominance of research projects adopting quantitative design [104] is reflected in this scoping review, as 89% of the identified publications used quantitative methods.

The BMHSU is mainly used for research examining health care in general, without focusing on specific diseases. This is not surprising, as the recent BMHSU was not developed for any specific care setting or disease [16]. Still, a wide range of publications have focused on specific care settings (e.g., nursing, mental health services) and diseases (e.g., mental disorders). Individuals aged  $\geq 50$  years are the largest target group represented in this overview. Possible

1  
2 explanations for this finding include the fact that this population represents the largest, and  
3  
4 fastest growing cohort in the broader population [105]. Further, this group uses health care  
5  
6 services most frequently [106].  
7

### 9 **Qualitative synthesis on the use of the BMHSU in qualitative health services research**

10 The relevance of the BMHSU for qualitative projects within health services research is  
11  
12 demonstrated by our results. Still, there are some limitations within the BMHSU, which should  
13  
14 be critically considered depending on the research question.  
15  
16

17  
18 The publications featuring a qualitative design mainly consider the individual characteristics  
19  
20 within the BMHSU. Since the primary interest of qualitative research is the subjective  
21  
22 experience of individuals, this result is not surprising [107]. In addition, it was noted that people  
23  
24 from the target group were primarily interviewed in these studies, while there were fewer next  
25  
26 of kin or health professionals interviewed. Experts may wish to consider obtaining more  
27  
28 information about contextual characteristics in their research. Since the data extraction within  
29  
30 the descriptive overview was carried out at the level of titles and abstracts, it is not possible to  
31  
32 determine whether contextual characteristics in publications featuring a quantitative study  
33  
34 design are more strongly represented in this review.  
35  
36  
37  
38

39 Although over half of all publications that adopted a qualitative design had been published since  
40  
41 2013, most of them considered the Andersen model of 1995, which is also a result of the review  
42  
43 by Babitsch et al. [3]. Only one of the publications with a qualitative design [55] adopted the  
44  
45 most current and comprehensive BMHSU from the year 2013 [16]. This is interesting, as some  
46  
47 authors expanded upon an older version of the BMHSU and justified various missing factors  
48  
49 (e.g., provider negligence and dissatisfaction, location of a clinic), although these factors are  
50  
51 actually included in the most current version of the BMHSU from 2013 [16]. It is important to  
52  
53 consider that even R.M. Andersen himself had additional thoughts on the model [9]. For  
54  
55 example, he co-authored a publication [29] with the aim to expand the view from the original  
56  
57 model on psychosocial factors.  
58  
59  
60

1  
2 One new factor that has been discussed in some of the considered studies is health literacy.  
3  
4 Health literacy relates to many parts of the Andersen model and cannot be assigned to a specific  
5  
6 level or factor. We recommend integrating health literacy as an additional factor in the BMHSU,  
7  
8 as an individual's health literacy and health-literate organizations are important foundations for  
9  
10 the (non-)use of health care services, and consequently for health care research [95, 96].  
11  
12

### 13 **Strengths and limitations**

14  
15 When interpreting the results, it should be noted that although we performed systematic  
16  
17 searches, some publications might have been missed. For example, articles that did not mention  
18  
19 the BMHSU, or the three core factors in the title and abstract were not included. Further, articles  
20  
21 may have been excluded given that we restricted our search to five databases. However, it  
22  
23 became apparent, that all previously known key publications have been identified through our  
24  
25 search strategy [3, 8, 9, 11, 12, 15]. Another limitation is that the extraction of publication  
26  
27 characteristics was divided between the first authors (ML, JT) and were not extracted twice.  
28  
29 Also, the quality of this scoping review is based on the quality of the information contained in  
30  
31 the included publications. We considered the general utilization of the BMHSU in health  
32  
33 services research (as identified in the descriptive overview) at the title and abstract level, and  
34  
35 not at the full-text level. An analysis of the full-texts could provide further information about –  
36  
37 and more detailed insights into – the application of the BMHSU. When coding the results based  
38  
39 on the various model factors, one challenge faced by our team was appropriately assigning the  
40  
41 factors, as the assignment of the factors was not always clear. The detailed description of the  
42  
43 current BMHSU by Andersen et al. [16] served us substantially for the assignment of the  
44  
45 factors. Any uncertainties were discussed in the review team. Also, our comparison of the  
46  
47 various studies that adopted a qualitative design is limited by the fact that very different versions  
48  
49 of the model were used.  
50  
51

52  
53 Regarding the influence of the reviewers on the review, it should be mentioned that the review  
54  
55 team was composed of individuals with experience in systematic reviews, health services  
56  
57  
58  
59  
60

1  
2 research and qualitative methods, had no affiliation with the research and no funding for the  
3  
4 review. It should be noted that this scoping review is the first to explore the application of the  
5  
6 widely adopted BMHSU without limiting our search based on target group, care setting, or  
7  
8 disease since the model was initially published in 1968. Further, this review examined  
9  
10 publications adopting qualitative study designs, strengthening the perceptions of qualitative  
11  
12 methods in health care research. This review provides the first-ever overview of the  
13  
14 (un)suitability of the BMHSU in qualitative research.  
15  
16

### 17 18 **Conclusion**

19  
20 This scoping review reveals that the BMHSU, which is one of the main models in health care  
21  
22 services research, has broad applications in very different care settings, across various diseases,  
23  
24 and focuses on a wide range of target groups. The BMHSU is mainly used in quantitative  
25  
26 studies, but our review also shows the suitability of the model for qualitative research. As health  
27  
28 literacy in particular plays an increasingly important role in health care utilization [95], we think  
29  
30 it is important to take this factor into account in the BMHSU. In further research, it would be  
31  
32 interesting to examine this relationship more thoroughly. Additionally, it might be interesting  
33  
34 to compare the application of the BMHSU in quantitative and qualitative research. The  
35  
36 application of so many different (and older) models of health care utilization makes it difficult  
37  
38 to compare the individual studies with one another. However, such a comparison would be  
39  
40 particularly important in the context of health services research. For future health services  
41  
42 research, the current and most comprehensive version of the BMHSU [16] should always be  
43  
44 considered.  
45  
46  
47  
48  
49  
50

### 51 52 **Author contributions**

53  
54 ML, JT and EMB conceived the idea of the scoping review. ML, JT built the search strategy,  
55  
56 screened the search results, and extracted the data. ML, JT, and EMB interpreted the findings  
57  
58 and wrote the manuscript. All authors read and approved the final manuscript.  
59  
60



## Competing interests

The authors declare that they have no competing interests.

## Funding

This manuscript is supported by the cooperative doctoral study course, “Health Services Research: Collaborative Care” located in Freiburg, Germany. The doctoral study course is, in turn, brought forward by the Ministry of Science, Research and the Arts Baden-Württemberg. The article processing charge was funded by the Baden-Württemberg Ministry of Science, Research and Culture and the University of Education, Freiburg in the funding programme Open Access Publishing.

## Ethics approval

This scoping review was based on published data. As researchers did not access any information that could lead to the identification of an individual patient, no concerning ethical issue was raised in this research. Therefore, obtaining ethical approval and consent of participants was waived.

## Data availability statement

All data relevant to the study are included in the article or uploaded as supplementary information.

## Acknowledgements

We thank Dr. Lisa Lyssenko for her valuable comments on an earlier draft of the manuscript.

Figure 1: Andersen’s Behavioral Model of Health Services Use

Figure 2: Flowdiagram based on PRISMA

## REFERENCES

- 1 Gellman MD, Turner JR, eds. Encyclopedia of Behavioral Medicine. New York, NY: Springer 2013.

- 2 Advisory Council on the Assessment of Developments in the Health Care System. Needs-  
3 Based Regulation of the Health Care Provision: Introduction and Summary 2018.
- 6 3 Babitsch B, Gohl D, Lengerke Tv. Re-revisiting Andersen's Behavioral Model of Health  
7 Services Use: a systematic review of studies from 1998-2001. *GMS Psycho-Social-*  
8 *Medicine* 2012;9:1–15.
- 13 4 Baumann W, Farin E, Menzel-Begemann A, et al. Memorandum IV: Theoretical and  
14 Normative Grounding of Health Services Research. *Gesundheitswesen* 2016;78(5):337–  
15 52 (accessed 27 Sep 2019).
- 20 5 Weiner BJ, Amick HR, Lund JL, et al. Use of qualitative methods in published health  
21 services and management research: a 10-year review. *Medical care research and review:*  
22 *MCCR* 2011;68(1):3–33 (accessed 16 Apr 2019).
- 27 6 Ricketts TC, Goldsmith LJ. Access in health services research: the battle of the  
28 frameworks. *Nurs Outlook* 2005;53(6):274–80 (accessed 4 Jul 2019).
- 31 7 Andersen R. A behavioral model of families' use of health services. Chicago, Ill.: Univ.  
32 of Chicago 1968.
- 36 8 Andersen RM. National Health Surveys and the Behavioral Model of Health Services Use.  
37 *Med Care* 2008;46(7):647–53.
- 41 9 Andersen RM. Revisiting the Behavioral Model and Access to Medical Care: Does it  
42 Matter? *J Health Soc Behav* 1995;36(1):1–10.
- 45 10 Lengerke Tv, Gohl D, Babitsch B. Re-visiting the Behavioral Model of Health Care  
46 Utilization by Andersen: A Review on Theoretical Advances and Perspectives. In: Janssen  
47 C, Swart E, Lengerke Tv, eds. *Health Care Utilization in Germany: Theory, Methodology,*  
48 *and Results.* New York: Springer New York 2014:11–28.
- 54 11 Andersen R, Newman JF. Societal and individual determinants of medical care utilization  
55 in the United States. *Milbank Mem Fund Q Health Soc* 1973;51(1):95–124.

- 12 Aday LA, Andersen R. A Framework for the Study of Access to Medical Care. *BMC Health Serv Res* 1974;208–20.
- 13 Gelberg L, Andersen RM, Leake BD. The Behavioral Model for Vulnerable Populations: application to medical care use and outcomes for homeless people. *Health Services Research* 2000;34(6):1273–302.
- 14 Fouladbakhsh JM, Stommel M. Using the behavioral model for complementary and alternative medicine: The CAM healthcare model. *Journal of Complementary and Integrative Medicine* 2007;4(1).
- 15 Gelberg L, Andersen RM, Leake B. The Behavioral Model for Vulnerable Populations: Application to Medical Care Use and Outcomes for Homeless People. *Health Services Research* 2000;34(6) (accessed 13 Sep 2018).
- 16 Andersen RM, Davidson PL, Baumeister SE. Improving Access to Care. In: Kominski GF, ed. *Changing the U.S. health care system: Key issues in health services policy and management*, 4th edn. San Francisco, California: Jossey-Bass 2013:33–69.
- 17 Guilcher SJT, Craven BC, McColl MA, et al. Application of the Andersen's health care utilization framework to secondary complications of spinal cord injury: a scoping review. *Disabil Rehabil* 2011;34(7):531–41.
- 18 Chong WF, Ho RM-H. Caregiver needs and formal long-term care service utilization in the Andersen Model: An individual-participant systematic review and meta-analysis. *International Journal of Integrated Care* 2018;18.
- 19 Tricco AC, Lillie E, Zarin W, et al. PRISMA Extension for Scoping Reviews (PRISMA-ScR): Checklist and Explanation. *Ann Intern Med* 2018;169(7):467–73 (accessed 10 Aug 2020).
- 20 Joanna Briggs Institute. Checklist for Qualitative Research 2017. Available at: [https://joannabriggs.org/sites/default/files/2019-05/JBI\\_Critical\\_Appraisal-Checklist\\_for\\_Qualitative\\_Research2017\\_0.pdf](https://joannabriggs.org/sites/default/files/2019-05/JBI_Critical_Appraisal-Checklist_for_Qualitative_Research2017_0.pdf) Accessed August 26, 2019.

- 1  
2 21 VERBI GmbH. MAXQDA: The Art of Data Analysis. Available at:  
3  
4 <https://www.maxqda.de/> Accessed January 27, 2020.  
5  
6 22 Kuckartz U. Qualitative text analysis: A guide to methods, practice & using software. Los  
7 Angeles: SAGE 2014.  
8  
9  
10 23 Andrasik MP, Rose R, Pereira D, et al. Barriers to cervical cancer screening among low-  
11 income HIV-positive African American women. *J Health Care Poor Underserved*  
12 2008;19(3):912–25.  
13  
14  
15 24 Artuso S, Cargo M, Brown A, et al. Factors influencing health care utilisation among  
16 Aboriginal cardiac patients in central Australia: a qualitative study. *BMC Health Serv Res*  
17 2013;13:83.  
18  
19  
20 25 Bascur-Castillo C, Araneda-Gatica V, Castro-Arias H, et al. Determinants in the process  
21 of seeking help for urinary incontinence in the Chilean health system. *Int J Gynaecol*  
22 *Obstet* 2019;144(1):103–11.  
23  
24  
25 26 Bayuo J. Experiences with out-patient hospital service utilisation among older persons in  
26 the Asante Akyem North District- Ghana. *BMC Health Serv Res* 2017;17(1):652.  
27  
28  
29 27 Boateng L, Nicolaou M, Dijkshoorn H, et al. An exploration of the enablers and barriers  
30 in access to the Dutch healthcare system among Ghanaians in Amsterdam. *BMC Health*  
31 *Serv Res* 2012;12:75.  
32  
33  
34 28 Bradbury-Jones C, Breckenridge JP, Devaney J, et al. Disabled women's experiences of  
35 accessing and utilising maternity services when they are affected by domestic abuse: a  
36 critical incident technique study. *BMC Pregnancy Childbirth* 2015;15:181.  
37  
38  
39 29 Bradley EH, McGraw SA, Curry L, et al. Expanding the Andersen model: the role of  
40 psychosocial factors in long-term care use. *Health Services Research* 2002;37(5):1221–  
41 42.  
42  
43  
44  
45  
46  
47  
48  
49  
50  
51  
52  
53  
54  
55  
56  
57  
58  
59  
60

- 1  
2  
3  
4  
5  
6  
7  
8  
9  
10  
11  
12  
13  
14  
15  
16  
17  
18  
19  
20  
21  
22  
23  
24  
25  
26  
27  
28  
29  
30  
31  
32  
33  
34  
35  
36  
37  
38  
39  
40  
41  
42  
43  
44  
45  
46  
47  
48  
49  
50  
51  
52  
53  
54  
55  
56  
57  
58  
59  
60
- 30 Butler C, Kim-Godwin Y, Fox JA. Exploration of health care concerns of Hispanic women in a rural southeastern North Carolina community. *Online Journal of Rural Nursing and Health Care* 2008;8(2):22–32.
- 31 Chiu TML. Usage and Non-usage Behaviour of eHealth Services Among Chinese Canadians Caring for a Family Member with Dementia 2008.
- 32 Chiu MWY. Psychosocial responses to falling in older Chinese immigrants living in the community 2011.
- 33 Conner NE, Chase SK. Decisions and caregiving: End of life among Blacks from the perspective of informal caregivers and decision makers. *Am J Hosp Palliat Care* 2015;32(4):454–63. <http://www.redibw.de/db/ebSCO.php/search.ebSCOhost.com/login.aspx%3fdirect%3dtrue%26db%3dpsych%26AN%3d2015-21262-013%26site%3dehost-live>.
- 34 Corboy D, McDonald J, McLaren S. Barriers to accessing psychosocial support services among men with cancer living in rural Australia: Perceptions of men and health professionals. *Int J Mens Health* 2011;10(2):163–83. <http://www.redibw.de/db/ebSCO.php/search.ebSCOhost.com/login.aspx%3fdirect%3dtrue%26db%3dpsych%26AN%3d2011-21872-004%26site%3dehost-live>.
- 35 Doshi RK, Malebranche D, Bowleg L, et al. Health care and HIV testing experiences among Black men in the South: implications for "Seek, Test, Treat, and Retain" HIV prevention strategies. *AIDS Patient Care STDS* 2013;27(2):123–33.
- 36 Gill P, Logan K, John B, et al. Participants' experiences of ketamine bladder syndrome: A qualitative study. *International Journal of Urological Nursing* 2018;12(2/3):76–83. <http://www.redibw.de/db/ebSCO.php/search.ebSCOhost.com/login.aspx%3fdirect%3dtrue%26db%3dcin20%26AN%3d132481296%26site%3dehost-live>.

- 1  
2 37 Hawk M, Coulter RWS, Egan JE, et al. Exploring the Healthcare Environment and  
3  
4 Associations with Clinical Outcomes of People Living with HIV/AIDS. *AIDS Patient*  
5  
6 *Care STDS* 2017;31(12):495–503.  
7  
8  
9 38 Herrera AP, Lee J, Palos G, et al. Cultural influences in the patterns of long-term care use  
10  
11 among Mexican American family caregivers. *J Appl Gerontol* 2008;27(2):141–65.  
12  
13 [http://www.redi-  
18  
19  
20  
21  
22  
23  
24  
25  
26  
27  
28  
29  
30  
31  
32  
33  
34  
35  
36  
37  
38  
39  
40  
41  
42  
43  
44  
45  
46  
47  
48  
49  
50  
51  
52  
53  
54  
55  
56  
57  
58  
59  
60](http://www.redi-<br/>14<br/>15 bw.de/db/ebsco.php/search.ebscohost.com/login.aspx%3fdirect%3dtrue%26db%3dpsyh<br/>16<br/>17 %26AN%3d2008-03902-002%26site%3dehost-live)  
39 Herrmann WJ, Haarmann A, Bærheim A. A sequential model for the structure of health  
care utilization. *PLoS ONE* 2017;12(5):e0176657.  
40 Holtzman CW, Shea JA, Glanz K, et al. Mapping patient-identified barriers and  
facilitators to retention in HIV care and antiretroviral therapy adherence to Andersen's  
Behavioral Model. *AIDS Care* 2015;27(7):817–28.  
41 Ko LK, Taylor VM, Mohamed FB, et al. "We brought our culture here with us": A  
qualitative study of perceptions of HPV vaccine and vaccine uptake among East African  
immigrant mothers. *Papillomavirus Res* 2018;7:21–25.  
42 Goh SN. Post Acute Care of the Elderly in Singapore What Factors Influence Use of  
Services? *Asia Pacific Journal of Social Work and Development* 2011;21(1):31–53.  
[http://gateway.webofknowledge.com/gateway/Gateway.cgi?GWVersion=2&SrcAuth=S  
wissAcademicSoftware&SrcApp=Citavi&DestLinkType=FullRecord&DestApp=WOS  
&KeyUT=000292427400004](http://gateway.webofknowledge.com/gateway/Gateway.cgi?GWVersion=2&SrcAuth=S<br/>wissAcademicSoftware&SrcApp=Citavi&DestLinkType=FullRecord&DestApp=WOS<br/>&KeyUT=000292427400004).  
43 Koce F, Randhawa G, Ochieng B. Understanding healthcare self-referral in Nigeria from  
the service users' perspective: a qualitative study of Niger state. *BMC Health Serv Res*  
2019;19(1):209.  
44 Kohno A, Nik Farid ND, Musa G, et al. Factors affecting Japanese retirees' healthcare  
service utilisation in Malaysia: a qualitative study. *BMJ Open* 2016;6(3):e010668.

- 1  
2 45 Maulik PK, Tewari A, Devarapalli S, et al. The Systematic Medical Appraisal, Referral  
3 and Treatment (SMART) Mental Health Project: Development and Testing of Electronic  
4 Decision Support System and Formative Research to Understand Perceptions about  
5 Mental Health in Rural India. *PLoS ONE* 2016;11(10):e0164404.  
6  
7  
8  
9  
10  
11 46 Mukasa B. Maternal and child health access disparities among recent African immigrants  
12 in the United States 2016.  
13  
14  
15 47 Obikunle AF. Barriers to breast cancer prevention and screening among African American  
16 women 2016.  
17  
18  
19  
20 48 Parkman T, Neale J, Day E, et al. Qualitative exploration of why people repeatedly attend  
21 emergency departments for alcohol-related reasons. *BMC Health Serv Res*  
22 2017;17(1):140.  
23  
24  
25  
26 49 Porteous T, Wyke S, Hannaford P, et al. Self-care behaviour for minor symptoms: can  
27 Andersen's Behavioral Model of Health Services Use help us to understand it? *Int J Pharm*  
28 *Pract* 2015;23(1):27–35.  
29  
30  
31  
32 50 Rööst M, Jonsson C, Liljestrand J, et al. Social differentiation and embodied dispositions:  
33 a qualitative study of maternal care-seeking behaviour for near-miss morbidity in Bolivia.  
34 *Reprod Health* 2009;6:13.  
35  
36  
37  
38 51 Schatz E, Seeley J, Negin J, et al. "For us here, we remind ourselves": strategies and  
39 barriers to ART access and adherence among older Ugandans. *BMC Public Health*  
40 2019;19(1):131.  
41  
42  
43  
44 52 Serna CA. Exploring oral health problems in adult hispanic migrant farmworkers: A  
45 mixed-methods approach 2014.  
46  
47  
48  
49 53 Tewari A, Kallakuri S, Devarapalli S, et al. Process evaluation of the systematic medical  
50 appraisal, referral and treatment (SMART) mental health project in rural India. *BMC*  
51 *Psychiatry* 2017;17(1):385.  
52  
53  
54  
55  
56  
57  
58  
59  
60

- 1  
2 54 White AW. The role of social and cultural factors on preventive health service use among  
3  
4 young, rural, African American men: A narrative inquiry 2017.  
5
- 6 55 Isaak C.A., Mota N., Medved M., et al. Conceptualizations of help-seeking for mental  
7  
8 health concerns in First Nations communities in Canada: A comparison of fit with the  
9  
10 Andersen Behavioral Model. *Transcult. Psychiatry* 2020.  
11  
12 <http://tps.sagepub.com/content/by/year>.  
13  
14
- 15 56 Lee HY, Lee MH, Jang YJ, et al. Breast Cancer Screening Disparity among Korean  
16  
17 American Immigrant Women in Midwest. *Asian Pac J Cancer Prev* 2017;18(10):2663–  
18  
19 67.  
20  
21
- 22 57 Roberson M.C. Refusal of epidural anesthesia for labor pain management by African  
23  
24 American parturients: An examination of factors. *AANA J.* 2019;87(4):299–304.  
25  
26 <https://www.aana.com/publications/aana-journal>.  
27  
28
- 29 58 Due C., Aldam I., Ziersch A. Understanding oral health help-seeking among Middle  
30  
31 Eastern refugees and asylum seekers in Australia: An exploratory study. *Community Dent*  
32  
33 *Oral Epidemiol* 2020.  
34  
35
- 36 59 Green D.C., Wheeler E.M. A Qualitative Exploration of Facilitators for Health Service  
37  
38 Use among Aging Gay Men Living with HIV. *J. Int. Assoc. Providers AIDS Care* 2019;18.  
39  
40 <http://jia.sagepub.com/content/by/year>.  
41  
42
- 43 60 Fleury M.-J., Grenier G., Farand L., et al. Reasons for Emergency Department Use among  
44  
45 Patients with Mental Disorders. *Psychiatr Q* 2019;90(4):703–16.  
46  
47 <http://www.wkap.nl/journalhome.htm/0033-2720>.  
48  
49
- 50 61 Coleman TM. Help-seeking experiences of African American men with depression 2019.  
51
- 52 62 Opoku D, Busse R, Quentin W. Achieving Sustainability and Scale-Up of Mobile Health  
53  
54 Noncommunicable Disease Interventions in Sub-Saharan Africa: Views of Policy Makers  
55  
56 in Ghana. *JMIR Mhealth Uhealth* 2019;7(5):e11497.  
57  
58  
59  
60



- 1  
2 63 Blanas DA, Nichols K, Bekele M, et al. Adapting the Andersen model to a francophone  
3  
4 West African immigrant population: hepatitis B screening and linkage to care in New  
5  
6 York City. *J Community Health* 2015;40(1):175–84.  
7  
8  
9 64 Callahan CC. Cancer, vulnerability, and financial quality of life: A mixed methods study  
10  
11 2012.  
12  
13 65 Cathers LA. Exploring substance use disorders community outpatient counselors'  
14  
15 experiences treating clients with co-occurring medical conditions: An interpretative  
16  
17 phenomenological analysis 2014.  
18  
19  
20 66 Coe AB, Moczygamba LR, Gatewood SBS, et al. Medication adherence challenges among  
21  
22 patients experiencing homelessness in a behavioral health clinic. *Res Social Adm Pharm*  
23  
24 2015;11(3):e110-20.  
25  
26  
27 67 Levison JH, Bogart LM, Khan IF, et al. "Where It Falls Apart": Barriers to Retention in  
28  
29 HIV Care in Latino Immigrants and Migrants. *AIDS Patient Care STDS* 2017;31(9):394–  
30  
31 405.  
32  
33  
34 68 Lor B, Ornelas IJ, Magarati M, et al. We Should Know Ourselves: Burmese and Bhutanese  
35  
36 Refugee Women's Perspectives on Cervical Cancer Screening. *J Health Care Poor*  
37  
38 *Underserved* 2018;29(3):881–97.  
39  
40  
41 69 Noh H, Schropfer TA. Terminally ill African American elders' access to and use of  
42  
43 hospice care. *Am J Hosp Palliat Care* 2015;32(3):286–97.  
44  
45  
46 70 Rice MB. Attitudes of women offenders towards medicaid enrollment and coverage under  
47  
48 the Affordable Care Act 2017.  
49  
50  
51 71 Scott KL. Delay to treatment for Latinos diagnosed with lung and head-and-neck cancers:  
52  
53 Application of the behavioral model for vulnerable populations 2013.  
54  
55  
56 72 Velez D, Palomo-Zerfas A, Nunez-Alvarez A, et al. Facilitators and Barriers to Dental  
57  
58 Care Among Mexican Migrant Women and Their Families in North San Diego County. *J*  
59  
60 *Immigr Minor Health* 2017;19(5):1216–26.

- 1  
2 73 Dergal J. Family members' use of private companions in nursing homes: A mixed methods  
3 study 2012.  
4  
5  
6 74 Gräbel E, Luttenberger K, Trilling A, et al. Counselling for dementia caregivers-predictors  
7 for utilization and expected quality from a family caregiver's point of view. *Eur J Ageing*  
8 2010;7(2):111–19.  
9  
10  
11  
12  
13 75 Henson LA, Higginson IJ, Daveson BA, et al. 'I'll be in a safe place': a qualitative study  
14 of the decisions taken by people with advanced cancer to seek emergency department care.  
15 *BMJ Open* 2016;6(11).  
16 [http://gateway.webofknowledge.com/gateway/Gateway.cgi?GWVersion=2&SrcAuth=SwissAcademicSoftware&SrcApp=Citavi&DestLinkType=FullRecord&DestApp=WOS](http://gateway.webofknowledge.com/gateway/Gateway.cgi?GWVersion=2&SrcAuth=SwissAcademicSoftware&SrcApp=Citavi&DestLinkType=FullRecord&DestApp=WOS&KeyUT=000391303400076)  
17 &KeyUT=000391303400076.  
18  
19  
20  
21  
22  
23  
24  
25  
26  
27 76 Navarro-Millan I, Zinski A, Shurbaji S, et al. Perspectives of Rheumatoid Arthritis  
28 Patients on Electronic Communication and Patient-Reported Outcome Data Collection: A  
29 Qualitative Study. *Arthritis Care and Research* 2019;71(1):80–87.  
30  
31  
32  
33  
34 77 Rachlis B, Naanyu V, Wachira J, et al. Community Perceptions of Community Health  
35 Workers (CHWs) and Their Roles in Management for HIV, Tuberculosis and  
36 Hypertension in Western Kenya. *PLoS ONE* 2016;11(2):e0149412.  
37  
38  
39  
40  
41 78 Rachlis B, Naanyu V, Wachira J, et al. Identifying common barriers and facilitators to  
42 linkage and retention in chronic disease care in western Kenya. *BMC Public Health*  
43 2016;16:741.  
44  
45  
46  
47  
48 79 Riang'a RM, Nangulu AK, Broerse JEW. "I should have started earlier, but I was not  
49 feeling ill!" Perceptions of Kalenjin women on antenatal care and its implications on initial  
50 access and differentials in patterns of antenatal care utilization in rural Uasin Gishu  
51 County Kenya. *PLoS ONE* 2018;13(10):e0202895.  
52  
53  
54  
55  
56  
57 80 Victor C, Davies S, Dickinson A, et al. "It just happens". Care home residents' experiences  
58 and expectations of accessing GP care. *Arch Gerontol Geriatr* 2018;79:97–103.  
59  
60

- 1  
2  
3  
4  
5  
6  
7  
8  
9  
10  
11  
12  
13  
14  
15  
16  
17  
18  
19  
20  
21  
22  
23  
24  
25  
26  
27  
28  
29  
30  
31  
32  
33  
34  
35  
36  
37  
38  
39  
40  
41  
42  
43  
44  
45  
46  
47  
48  
49  
50  
51  
52  
53  
54  
55  
56  
57  
58  
59  
60
- 81 Condelius A, Andersson M. Exploring access to care among older people in the last phase of life using the behavioural model of health services use: a qualitative study from the perspective of the next of kin of older persons who had died in a nursing home. *BMC Geriatr* 2015;15:138.
- 82 Han H, Perumalswami P, Kleinman L, et al. Voices of multi-ethnic providers in NYC: Health care for viral hepatitis. *Hepatology* 2013;Conference 64th Annual Meeting of the American Association for the Study of Liver Diseases The Liver Meeting 2013. Washington, DC United States. Conference Publication:1195A-1196A. <http://ovidsp.ovid.com/ovidweb.cgi?T=JS&CSC=Y&NEWS=N&PAGE=fulltext&D=emed14&AN=71238042>.
- 83 Perry R, Gard Read J, Chandler C, et al. Understanding Participants' Perceptions of Access to and Satisfaction With Chronic Disease Prevention Programs. *Health Educ Behav* 2019;1090198118822710.
- 84 Thiessen K, Heaman M, Mignone J, et al. Barriers and facilitators related to implementation of regulated midwifery in Manitoba: a case study. *BMC Health Serv Res* 2016;16:1–22. <http://www.redibw.de/db/ebSCO.php/search.ebscohost.com/login.aspx%3fdirect%3dtrue%26db%3dcin20%26AN%3d113906425%26site%3dehost-live>.
- 85 Briones-Vozmediano E., Castellanos-Torres E., Goicolea I., et al. Challenges to Detecting and Addressing Intimate Partner Violence Among Roma Women in Spain: Perspectives of Primary Care Providers. *J Interpers Violence* 2019;886260519872299.
- 86 Chao Y.-Y., Seo J.Y., Katigbak C., et al. Utilization of Mental Health Services Among Older Chinese Immigrants in New York City. *Community Ment Health J* 2020.
- 87 Shewamene Z, Dune T, Smith CA. Use of traditional and complementary medicine for maternal health and wellbeing by African migrant women in Australia: a mixed method study. *BMC Complement Med Ther* 2020;20(1):60.

- 1  
2 88 Majaj L, Nassar M, Allegri M. "It's not easy to acknowledge that I'm ill": a qualitative  
3  
4 investigation into the health seeking behavior of rural Palestinian women. *BMC Womens*  
5  
6 *Health* 2013;13.  
7  
8 [http://gateway.webofknowledge.com/gateway/Gateway.cgi?GWVersion=2&SrcAuth=SwissAcademicSoftware&SrcApp=Citavi&DestLinkType=FullRecord&DestApp=WOS](http://gateway.webofknowledge.com/gateway/Gateway.cgi?GWVersion=2&SrcAuth=SwissAcademicSoftware&SrcApp=Citavi&DestLinkType=FullRecord&DestApp=WOS&KeyUT=000320055000001)  
9  
10 [http://gateway.webofknowledge.com/gateway/Gateway.cgi?GWVersion=2&SrcAuth=SwissAcademicSoftware&SrcApp=Citavi&DestLinkType=FullRecord&DestApp=WOS](http://gateway.webofknowledge.com/gateway/Gateway.cgi?GWVersion=2&SrcAuth=SwissAcademicSoftware&SrcApp=Citavi&DestLinkType=FullRecord&DestApp=WOS&KeyUT=000320055000001)  
11 [http://gateway.webofknowledge.com/gateway/Gateway.cgi?GWVersion=2&SrcAuth=SwissAcademicSoftware&SrcApp=Citavi&DestLinkType=FullRecord&DestApp=WOS](http://gateway.webofknowledge.com/gateway/Gateway.cgi?GWVersion=2&SrcAuth=SwissAcademicSoftware&SrcApp=Citavi&DestLinkType=FullRecord&DestApp=WOS&KeyUT=000320055000001)  
12 [http://gateway.webofknowledge.com/gateway/Gateway.cgi?GWVersion=2&SrcAuth=SwissAcademicSoftware&SrcApp=Citavi&DestLinkType=FullRecord&DestApp=WOS](http://gateway.webofknowledge.com/gateway/Gateway.cgi?GWVersion=2&SrcAuth=SwissAcademicSoftware&SrcApp=Citavi&DestLinkType=FullRecord&DestApp=WOS&KeyUT=000320055000001)  
13 [http://gateway.webofknowledge.com/gateway/Gateway.cgi?GWVersion=2&SrcAuth=SwissAcademicSoftware&SrcApp=Citavi&DestLinkType=FullRecord&DestApp=WOS](http://gateway.webofknowledge.com/gateway/Gateway.cgi?GWVersion=2&SrcAuth=SwissAcademicSoftware&SrcApp=Citavi&DestLinkType=FullRecord&DestApp=WOS&KeyUT=000320055000001)  
14 [http://gateway.webofknowledge.com/gateway/Gateway.cgi?GWVersion=2&SrcAuth=SwissAcademicSoftware&SrcApp=Citavi&DestLinkType=FullRecord&DestApp=WOS](http://gateway.webofknowledge.com/gateway/Gateway.cgi?GWVersion=2&SrcAuth=SwissAcademicSoftware&SrcApp=Citavi&DestLinkType=FullRecord&DestApp=WOS&KeyUT=000320055000001)  
15  
16 89 Rodriguez HR, Dobalian A. Provider and Administrator Experiences With Providing HIV  
17  
18 Treatment and Prevention Services in Rural Areas. *AIDS Educ Prev* 2017;29(1):77–91.  
19  
20 90 Nowgesic EF. Antiretroviral Therapy Access, Acceptance and Adherence among Urban  
21  
22 Indigenous Peoples Living with HIV in Saskatchewan: The Indigenous Red Ribbon  
23  
24 Storytelling Study 2015.  
25  
26 91 Heidari P., Cross W., Weller C., et al. Rheumatologists' insight into medication adherence  
27  
28 in patients with rheumatoid arthritis: A qualitative study. *Int. J. Rheum. Dis.*  
29  
30 2019;22(9):1695–705. [http://onlinelibrary.wiley.com/journal/10.1111/\(ISSN\)1756-](http://onlinelibrary.wiley.com/journal/10.1111/(ISSN)1756-185X)  
31  
32 [http://onlinelibrary.wiley.com/journal/10.1111/\(ISSN\)1756-](http://onlinelibrary.wiley.com/journal/10.1111/(ISSN)1756-185X)  
33 [http://onlinelibrary.wiley.com/journal/10.1111/\(ISSN\)1756-](http://onlinelibrary.wiley.com/journal/10.1111/(ISSN)1756-185X)  
34 [http://onlinelibrary.wiley.com/journal/10.1111/\(ISSN\)1756-](http://onlinelibrary.wiley.com/journal/10.1111/(ISSN)1756-185X)  
35 [http://onlinelibrary.wiley.com/journal/10.1111/\(ISSN\)1756-](http://onlinelibrary.wiley.com/journal/10.1111/(ISSN)1756-185X)  
36  
37 92 Robinson P.G., Douglas G.V.A., Gibson B.J., et al. Remuneration of primary dental care  
38  
39 in England: A qualitative framework analysis of perspectives of a new service delivery  
40  
41 model incorporating incentives for improved access, quality and health outcomes. *BMJ*  
42  
43 *Open* 2019;9(10):e031886. <http://bmjopen.bmj.com/content/early/by/section>.  
44  
45 93 Travers J.L., Hirschman K.B., Naylor M.D. Adapting Andersen's expanded behavioral  
46  
47 model of health services use to include older adults receiving long-term services and  
48  
49 supports. *BMC Geriatr* 2020;20(1):58.  
50  
51 94 Grodensky CA, Rosen DL, Blue CM, et al. Medicaid Enrollment among Prison Inmates  
52  
53 in a Non-expansion State: Exploring Predisposing, Enabling, and Need Factors Related to  
54  
55 Enrollment Pre-incarceration and Post-Release. *Journal of urban health: bulletin of the*  
56  
57 *New York Academy of Medicine* 2018;95(4):454–66.  
58  
59  
60

- 1  
2 95 Sørensen K, van den Broucke S, Fullam J, et al. Health literacy and public health: a  
3  
4 systematic review and integration of definitions and models. *BMC Public Health*  
5  
6 2012;12:80 (accessed 20 Dec 2019).  
7  
8  
9 96 Brach C, Keller D, Hernandez Lyla M, et al. Ten Attributes of Health Literate Health Care  
10  
11 Organizations 2012. Available at: [https://nam.edu/wp-](https://nam.edu/wp-content/uploads/2015/06/BPH_Ten_HLit_Attributes.pdf)  
12  
13 content/uploads/2015/06/BPH\_Ten\_HLit\_Attributes.pdf. Accessed January 07, 2020.  
14  
15  
16 97 Go VF-1, Quan VM, Chung A, et al. Gender gaps, gender traps: sexual identity and  
17  
18 vulnerability to sexually transmitted diseases among women in Vietnam. *Soc Sci Med*  
19  
20 2002;55(3):467–81.  
21  
22  
23 98 Sperber NR, Andrews SM, Voils CI, et al. Barriers and Facilitators to Adoption of  
24  
25 Genomic Services for Colorectal Care within the Veterans Health Administration. *J Pers*  
26  
27 *Med* 2016;6(2).  
28  
29  
30 99 Mago A, MacEntee MI, Brondani M, et al. Anxiety and anger of homeless people coping  
31  
32 with dental care. *Community Dent Oral Epidemiol* 2018;46(3):225–30.  
33  
34  
35 100 Richards C. Women's experiences with the follow-up system for cervical cancer in a  
36  
37 developing country. 76 2015.  
38  
39  
40 101 Bradbury-Jones C, Breckenridge JP, Devaney J, et al. Priorities and strategies for  
41  
42 improving disabled women's access to maternity services when they are affected by  
43  
44 domestic abuse: a multi-method study using concept maps. *BMC Pregnancy Childbirth*  
45  
46 2015;15:350.  
47  
48  
49 102 Lee MH. Breast cancer screening behavior in Korean immigrant women in the United  
50  
51 States 2017.  
52  
53  
54 103 Noh H. Terminally ill Black elders: Making the choice to receive hospice care 2013.  
55  
56  
57 104 Chafe R. The Value of Qualitative Description in Health Services and Policy Research.  
58  
59 *Healthcare Policy* 2017;22(3):12–18 (accessed 4 Mar 2020).  
60

- 1  
2 105 Ritchie H, Roser M. Age Structure 2019. Available at: [https://ourworldindata.org/age-](https://ourworldindata.org/age-structure#)  
3  
4 structure# Accessed March 02, 2020.  
5  
6 106 Institute of Medicine. Retooling for an aging America: Building the health care workforce.  
7  
8 Washington D.C.: National Academies Press 2008.  
9  
10 107 Flick U, Kardorff Ev, Steinke I. What is Qualitative Research? And Introduction to the  
11  
12 Field. In: Flick U, Kardorff Ev, Steinke I, eds. A companion to qualitative research.  
13  
14 London: SAGE 2010:1–12.  
15  
16  
17  
18  
19  
20  
21  
22  
23  
24  
25  
26  
27  
28  
29  
30  
31  
32  
33  
34  
35  
36  
37  
38  
39  
40  
41  
42  
43  
44  
45  
46  
47  
48  
49  
50  
51  
52  
53  
54  
55  
56  
57  
58  
59  
60

For peer review only

Contextual characteristics

Individual characteristics

Health Behaviors

Outcomes

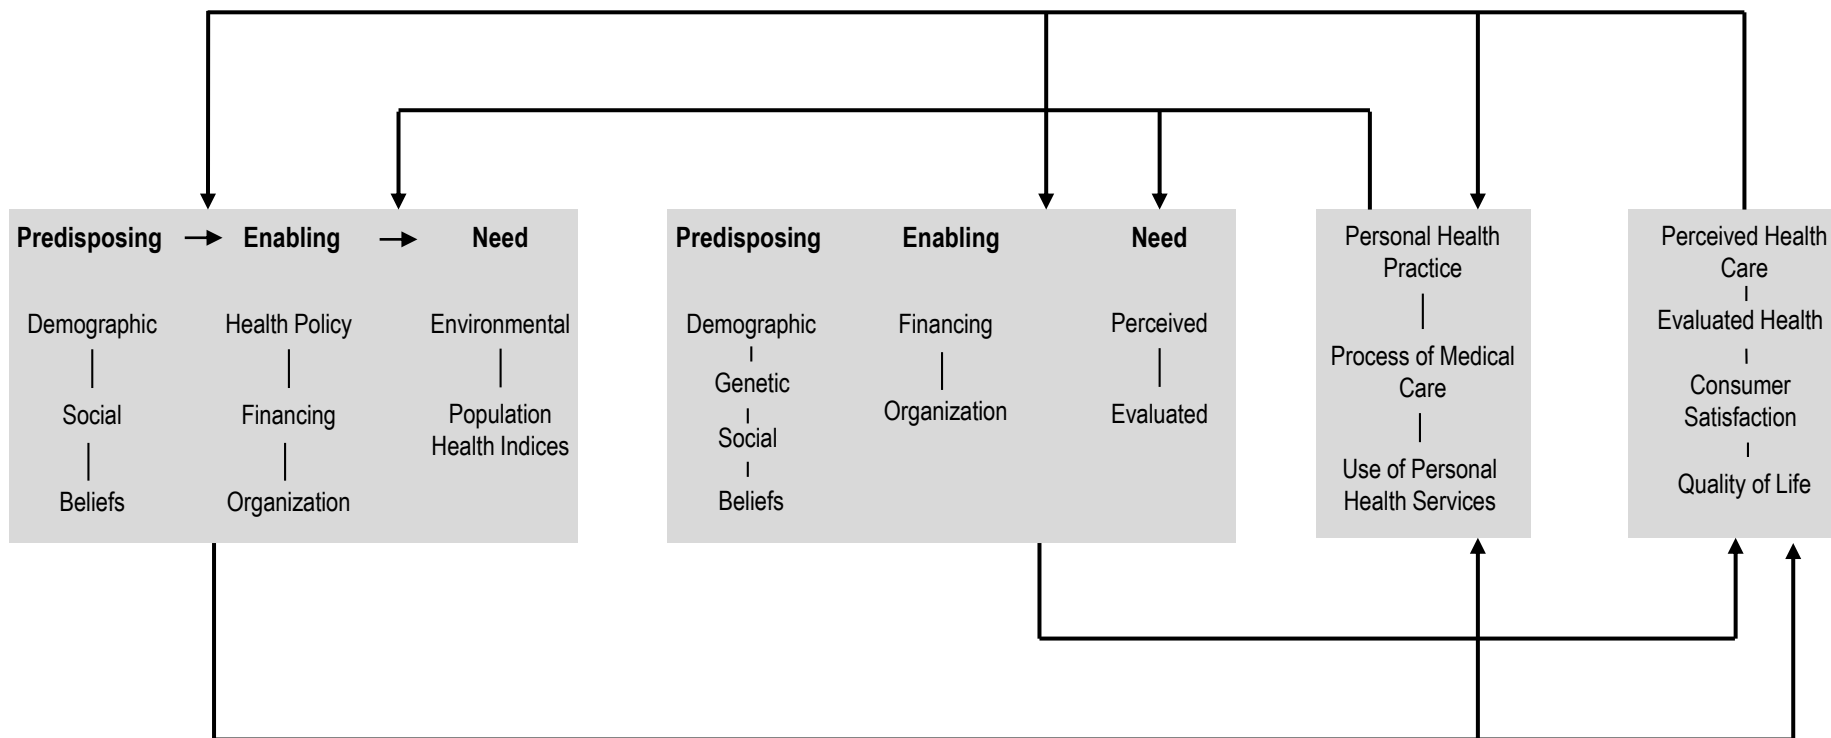

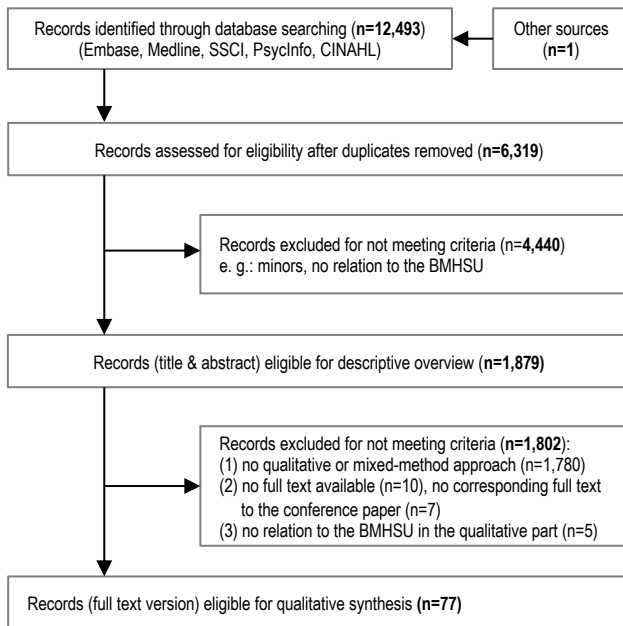



## Preferred Reporting Items for Systematic reviews and Meta-Analyses extension for Scoping Reviews (PRISMA-ScR) Checklist

| SECTION                                               | ITEM | PRISMA-ScR CHECKLIST ITEM                                                                                                                                                                                                                                                                                  | REPORTED ON PAGE # |
|-------------------------------------------------------|------|------------------------------------------------------------------------------------------------------------------------------------------------------------------------------------------------------------------------------------------------------------------------------------------------------------|--------------------|
| <b>TITLE</b>                                          |      |                                                                                                                                                                                                                                                                                                            |                    |
| Title                                                 | 1    | Identify the report as a scoping review.                                                                                                                                                                                                                                                                   | 1                  |
| <b>ABSTRACT</b>                                       |      |                                                                                                                                                                                                                                                                                                            |                    |
| Structured summary                                    | 2    | Provide a structured summary that includes (as applicable): background, objectives, eligibility criteria, sources of evidence, charting methods, results, and conclusions that relate to the review questions and objectives.                                                                              | 2                  |
| <b>INTRODUCTION</b>                                   |      |                                                                                                                                                                                                                                                                                                            |                    |
| Rationale                                             | 3    | Describe the rationale for the review in the context of what is already known. Explain why the review questions/objectives lend themselves to a scoping review approach.                                                                                                                                   | 3-5                |
| Objectives                                            | 4    | Provide an explicit statement of the questions and objectives being addressed with reference to their key elements (e.g., population or participants, concepts, and context) or other relevant key elements used to conceptualize the review questions and/or objectives.                                  | 5                  |
| <b>METHODS</b>                                        |      |                                                                                                                                                                                                                                                                                                            |                    |
| Protocol and registration                             | 5    | Indicate whether a review protocol exists; state if and where it can be accessed (e.g., a Web address); and if available, provide registration information, including the registration number.                                                                                                             | 6                  |
| Eligibility criteria                                  | 6    | Specify characteristics of the sources of evidence used as eligibility criteria (e.g., years considered, language, and publication status), and provide a rationale.                                                                                                                                       | 7                  |
| Information sources*                                  | 7    | Describe all information sources in the search (e.g., databases with dates of coverage and contact with authors to identify additional sources), as well as the date the most recent search was executed.                                                                                                  | 6                  |
| Search                                                | 8    | Present the full electronic search strategy for at least 1 database, including any limits used, such that it could be repeated.                                                                                                                                                                            | Additional file 2  |
| Selection of sources of evidence†                     | 9    | State the process for selecting sources of evidence (i.e., screening and eligibility) included in the scoping review.                                                                                                                                                                                      | 6,7                |
| Data charting process‡                                | 10   | Describe the methods of charting data from the included sources of evidence (e.g., calibrated forms or forms that have been tested by the team before their use, and whether data charting was done independently or in duplicate) and any processes for obtaining and confirming data from investigators. | 7,8                |
| Data items                                            | 11   | List and define all variables for which data were sought and any assumptions and simplifications made.                                                                                                                                                                                                     | 6,7                |
| Critical appraisal of individual sources of evidence§ | 12   | If done, provide a rationale for conducting a critical appraisal of included sources of evidence; describe the methods used and how this information was used in any data synthesis (if appropriate).                                                                                                      | 7                  |

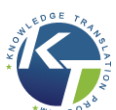

| SECTION                                       | ITEM | PRISMA-ScR CHECKLIST ITEM                                                                                                                                                                       | REPORTED ON PAGE # |
|-----------------------------------------------|------|-------------------------------------------------------------------------------------------------------------------------------------------------------------------------------------------------|--------------------|
| Synthesis of results                          | 13   | Describe the methods of handling and summarizing the data that were charted.                                                                                                                    | 8                  |
| <b>RESULTS</b>                                |      |                                                                                                                                                                                                 |                    |
| Selection of sources of evidence              | 14   | Give numbers of sources of evidence screened, assessed for eligibility, and included in the review, with reasons for exclusions at each stage, ideally using a flow diagram.                    | 8,9 and figure 2   |
| Characteristics of sources of evidence        | 15   | For each source of evidence, present characteristics for which data were charted and provide the citations.                                                                                     | 9                  |
| Critical appraisal within sources of evidence | 16   | If done, present data on critical appraisal of included sources of evidence (see item 12).                                                                                                      | 17                 |
| Results of individual sources of evidence     | 17   | For each included source of evidence, present the relevant data that were charted that relate to the review questions and objectives.                                                           | 13; 15-16          |
| Synthesis of results                          | 18   | Summarize and/or present the charting results as they relate to the review questions and objectives.                                                                                            | 8-17               |
| <b>DISCUSSION</b>                             |      |                                                                                                                                                                                                 |                    |
| Summary of evidence                           | 19   | Summarize the main results (including an overview of concepts, themes, and types of evidence available), link to the review questions and objectives, and consider the relevance to key groups. | 17                 |
| Limitations                                   | 20   | Discuss the limitations of the scoping review process.                                                                                                                                          | 19                 |
| Conclusions                                   | 21   | Provide a general interpretation of the results with respect to the review questions and objectives, as well as potential implications and/or next steps.                                       | 19, 20             |
| <b>FUNDING</b>                                |      |                                                                                                                                                                                                 |                    |
| Funding                                       | 22   | Describe sources of funding for the included sources of evidence, as well as sources of funding for the scoping review. Describe the role of the funders of the scoping review.                 | 20                 |

JBI = Joanna Briggs Institute; PRISMA-ScR = Preferred Reporting Items for Systematic reviews and Meta-Analyses extension for Scoping Reviews.

\* Where *sources of evidence* (see second footnote) are compiled from, such as bibliographic databases, social media platforms, and Web sites.

† A more inclusive/heterogeneous term used to account for the different types of evidence or data sources (e.g., quantitative and/or qualitative research, expert opinion, and policy documents) that may be eligible in a scoping review as opposed to only studies. This is not to be confused with *information sources* (see first footnote).

‡ The frameworks by Arksey and O'Malley (6) and Levac and colleagues (7) and the JBI guidance (4, 5) refer to the process of data extraction in a scoping review as data charting.

§ The process of systematically examining research evidence to assess its validity, results, and relevance before using it to inform a decision. This term is used for items 12 and 19 instead of "risk of bias" (which is more applicable to systematic reviews of interventions) to include and acknowledge the various sources of evidence that may be used in a scoping review (e.g., quantitative and/or qualitative research, expert opinion, and policy document).

From: Tricco AC, Lillie E, Zarin W, O'Brien KK, Colquhoun H, Levac D, et al. PRISMA Extension for Scoping Reviews (PRISMA-ScR): Checklist and Explanation. *Ann Intern Med.* 2018;169:467–473. doi: [10.7326/M18-0850](https://doi.org/10.7326/M18-0850).

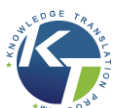

St. Michael's

Inspired Care.  
Inspiring Science.

For peer review only - <http://bmjopen.bmj.com/site/about/guidelines.xhtml>

## Additional file 2: Exemplary search strategy

| <b>Exemplary search strategy – Medline via Pubmed</b> |                                                                        |
|-------------------------------------------------------|------------------------------------------------------------------------|
| #1                                                    | "Andersen RM" [Author]                                                 |
| #2                                                    | "Andersen R" [Author]                                                  |
| #3                                                    | #1 OR #2                                                               |
| #4                                                    | "Andersen model"                                                       |
| #5                                                    | "Andersen's model"                                                     |
| #6                                                    | #4 OR #5                                                               |
| #7                                                    | "Behavioral Model of Health Services Use"                              |
| #8                                                    | "Behavioural Model of Health Services Use"                             |
| #9                                                    | #7 OR #8                                                               |
| #10                                                   | andersen*                                                              |
| #11                                                   | "behavior model"                                                       |
| #12                                                   | "behaviour model"                                                      |
| #13                                                   | "behavioral model"                                                     |
| #14                                                   | "behavioural model"                                                    |
| #15                                                   | (#11 OR #12 OR #13 OR #14) AND #10                                     |
| #16                                                   | "health model"                                                         |
| #17                                                   | #16 AND #10                                                            |
| #18                                                   | utilization                                                            |
| #19                                                   | utilisation                                                            |
| #20                                                   | "Facilities and Services Utilization"[Mesh]                            |
| #21                                                   | "Patient Acceptance of Health Care"[Mesh]                              |
| #22                                                   | model                                                                  |
| #23                                                   | (#18 OR #19 OR #20 OR #21) AND #22 AND #10                             |
| #24                                                   | aday*                                                                  |
| #25                                                   | davidson*                                                              |
| #26                                                   | newman*                                                                |
| #27                                                   | gelberg*                                                               |
| #28                                                   | (#22 OR #23 OR #24 OR #25) AND #10                                     |
| #29                                                   | predisposing                                                           |
| #30                                                   | enabling                                                               |
| #31                                                   | need                                                                   |
| #32                                                   | #27 AND #28 AND #29                                                    |
| #33                                                   | (#27 OR #28 OR #29) AND #10                                            |
| #34                                                   | "andersen framework"                                                   |
| #35                                                   | "Behavioral Model for Vulnerable Populations"                          |
| #36                                                   | #3 OR #6 OR #9 OR #15 OR #17 OR #23 OR #28 OR #32 OR #33 OR #34 OR #35 |
| #37                                                   | animals                                                                |
| #38                                                   | #36 NOT #37                                                            |
| #39                                                   | #36 NOT #37 Filters: Publication date from 1968/01/01 to 2019/04/09    |

## Additional file 3: All characteristics and categories

1  
2  
3  
4  
5  
6  
7  
8  
9  
10  
11  
12  
13  
14  
15  
16  
17  
18  
19  
20  
21  
22  
23  
24  
25  
26  
27  
28  
29  
30  
31  
32  
33  
34  
35  
36  
37  
38  
39  
40  
41  
42  
43  
44  
45  
46  
47  
48  
49  
50  
51  
52  
53  
54  
55  
56  
57  
58  
59  
60

| Diseases of interest          | Total n=1,879  |    |
|-------------------------------|----------------|----|
|                               | n <sup>1</sup> | %  |
| no specific disease           | 936            | 50 |
| mental disorder               | 229            | 12 |
| cancer                        | 134            | 7  |
| HIV                           | 96             | 5  |
| addiction                     | 82             | 4  |
| diabetes                      | 43             | 2  |
| cardiovascular disease        | 42             | 2  |
| dementia                      | 39             | 2  |
| oral diseases                 | 28             | 1  |
| chronic disease in general    | 25             | 1  |
| arthritis                     | 20             | 1  |
| maternal and perinatal health | 17             | 1  |
| disability                    | 16             | 1  |
| violence experience           | 13             | 1  |
| alzheimer's disease           | 12             | 1  |
| asthma                        | 11             | 1  |
| brain injury                  | 10             | 1  |
| flu                           | 7              | 0  |
| stroke                        | 7              | 0  |
| urologic diseases             | 7              | 0  |
| multiple sclerosis            | 7              | 0  |
| pulmonary disease             | 7              | 0  |
| osteoporosis                  | 6              | 0  |
| hepatitis B or C              | 5              | 0  |
| influenza                     | 5              | 0  |
| tuberculosis                  | 5              | 0  |
| parkinson's disease           | 5              | 0  |
| trauma                        | 4              | 0  |
| epilepsy                      | 4              | 0  |
| gastrointestinal diseases     | 4              | 0  |
| back pain                     | 4              | 0  |
| eye problems                  | 4              | 0  |
| autism spectrum disorder      | 3              | 0  |
| chronic pain                  | 3              | 0  |
| hearing loss                  | 3              | 0  |
| HPV                           | 3              | 0  |
| spinal cord injury            | 3              | 0  |
| hip or knee arthroplasty      | 3              | 0  |
| suicidal ideation or suicide  | 3              | 0  |
| others                        | 44             | 2  |

Legend:

<sup>1</sup> Since some publications included multiple care settings, target groups etc. the sum might be greater than 100%

## Additional file 3: All characteristics and categories

| Target groups                              | Total n=1,879  |    |
|--------------------------------------------|----------------|----|
|                                            | n <sup>1</sup> | %  |
| elderly individuals                        | 481            | 26 |
| migrants                                   | 322            | 17 |
| females                                    | 256            | 14 |
| general population                         | 255            | 14 |
| men                                        | 203            | 11 |
| individuals with mental disorder           | 127            | 7  |
| community-dwelling individuals             | 74             | 4  |
| caregivers                                 | 71             | 4  |
| individuals with low socio-economic status | 69             | 4  |
| individuals living in rural areas          | 68             | 4  |
| individuals with HIV                       | 65             | 3  |
| young individuals                          | 56             | 3  |
| soldiers or veterans                       | 56             | 3  |
| individuals with cancer                    | 50             | 3  |
| insured individuals                        | 39             | 2  |
| mothers                                    | 36             | 2  |
| individuals with diabetes                  | 33             | 2  |
| individuals living in urban areas          | 31             | 2  |
| individuals with cardiovascular disease    | 29             | 2  |
| individuals with disabilities              | 25             | 1  |
| patients                                   | 21             | 1  |
| individuals with dementia                  | 20             | 1  |
| LSBTIQ*                                    | 20             | 1  |
| people of color                            | 18             | 1  |
| individuals with arthritis                 | 17             | 1  |
| individuals with chronic disease           | 17             | 1  |
| employed individuals                       | 15             | 1  |
| vulnerable individuals                     | 15             | 1  |
| individuals with incarceration experience  | 13             | 1  |
| students                                   | 13             | 1  |
| health care providers                      | 12             | 1  |
| individuals with asthma                    | 11             | 1  |
| inpatients                                 | 11             | 1  |
| nursing home residents                     | 10             | 1  |
| individuals with brain injury              | 10             | 1  |
| care-dependent individuals                 | 10             | 1  |
| victims of violence                        | 9              | 0  |
| no specific population                     | 8              | 0  |
| uninsured individuals                      | 8              | 0  |
| individuals with cognitive impairment      | 7              | 0  |
| ethnic minorities                          | 7              | 0  |
| high-risk individuals                      | 5              | 0  |
| individuals at the end of life             | 5              | 0  |
| individuals in the emergency department    | 5              | 0  |
| individuals with stroke                    | 5              | 0  |
| married individuals                        | 5              | 0  |
| individuals with chronic pain              | 5              | 0  |

## Additional file 3: All characteristics and categories

| Target groups                               | Total n=1,879  |   |
|---------------------------------------------|----------------|---|
|                                             | n <sup>1</sup> | % |
| individuals with parkinson's disease        | 5              | 0 |
| individuals with multiple sclerosis         | 5              | 0 |
| complementary medicine clients              | 4              | 0 |
| discharged individuals                      | 4              | 0 |
| frail individuals                           | 4              | 0 |
| individuals with epilepsy                   | 4              | 0 |
| individuals with oral diseases              | 4              | 0 |
| outpatients                                 | 4              | 0 |
| primary care patients                       | 4              | 0 |
| parents                                     | 4              | 0 |
| individuals with experienced trauma         | 4              | 0 |
| border residents                            | 3              | 0 |
| individuals with alzheimer's disease        | 3              | 0 |
| individuals with back pain                  | 3              | 0 |
| individuals with hearing loss               | 3              | 0 |
| individuals with osteoporosis               | 3              | 0 |
| individuals with pulmonary disease          | 3              | 0 |
| individuals with spinal cord injury         | 3              | 0 |
| individuals with tuberculosis               | 3              | 0 |
| individuals with a hip or knee arthroplasty | 3              | 0 |
| individuals with obesity                    | 3              | 0 |
| sex workers                                 | 3              | 0 |
| addictive individuals                       | 3              | 0 |
| others                                      | 50             | 3 |

Legend:

<sup>1</sup> Since some publications included multiple care settings, target groups etc. the sum might be greater than 100%.

## Additional file 3: All characteristics and categories

| Care settings                          | Total n=1,879  |    |
|----------------------------------------|----------------|----|
|                                        | n <sup>1</sup> | %  |
| general health care                    | 471            | 25 |
| nursing                                | 237            | 13 |
| mental health services                 | 222            | 12 |
| medication use                         | 115            | 6  |
| Screening                              | 107            | 6  |
| oral health services                   | 104            | 6  |
| inpatient care                         | 99             | 5  |
| natal care                             | 77             | 4  |
| emergency care                         | 73             | 4  |
| addiction services                     | 56             | 3  |
| health expenditure                     | 44             | 2  |
| social services                        | 43             | 2  |
| community-based services               | 43             | 2  |
| preventive services                    | 43             | 2  |
| complementary and alternative medicine | 41             | 2  |
| outpatient care                        | 41             | 2  |
| HIV treatment services                 | 35             | 2  |
| cancer care                            | 27             | 1  |
| end-of-life care                       | 24             | 1  |
| e-health                               | 20             | 1  |
| vaccination                            | 19             | 1  |
| rehabilitation services                | 17             | 1  |
| patient satisfaction                   | 16             | 1  |
| health-related quality of life         | 14             | 1  |
| health insurance                       | 13             | 1  |
| health literacy                        | 12             | 1  |
| veterans health administration         | 9              | 0  |
| eye care                               | 8              | 0  |
| physical therapy                       | 8              | 0  |
| health behavior                        | 7              | 0  |
| self care                              | 6              | 0  |
| health information                     | 5              | 0  |
| chronic pain treatment                 | 5              | 0  |
| chronic care in general                | 4              | 0  |
| hyperlipidemia treatment               | 4              | 0  |
| health situation                       | 4              | 0  |
| case management                        | 3              | 0  |
| osteoporosis treatment                 | 3              | 0  |
| services for caregivers                | 3              | 0  |
| medical assistive devices              | 3              | 0  |
| physician trust                        | 3              | 0  |
| diabetes treatment                     | 3              | 0  |
| others                                 | 36             | 2  |

Legend:

<sup>1</sup> Since some publications included multiple care settings, target groups etc. the sum might be greater than 100%.

## Additional file 4: Characteristics of publications with qualitative study design

| Author & year of publication       | Country   | Method |    | Care Setting                           | Target group of interest                        | Disease of interest           | Document type | Survey | Respondents | N   | Application of the Andersen model       |              |
|------------------------------------|-----------|--------|----|----------------------------------------|-------------------------------------------------|-------------------------------|---------------|--------|-------------|-----|-----------------------------------------|--------------|
| Chao et al. 2020 [1]               | USA       | mm     | CA | Mental health services                 | Migrants; elderly individuals                   | Mental disorder               | A             | I      | TG          | 14  | A&A1974                                 | DC; DA       |
| Due et al. 2020 [2]                | Australia | ql     | CA | Oral health services                   | Migrants                                        | No specific disease           | A             | I      | TG, HP      | 26  | R-BMHSU1995                             | Theo; DC; DA |
| Isaak et al. 2020 [3]              | Canada    | ql     | GT | Mental health services                 | Racial and ethnic minorities                    | Mental disorder               | A             | I, FG  | TG          | 115 | BMHSU, R-BMHSU1995, A&N1973, A&D&B 2013 | Theo; DA     |
| Shewamene et al. 2020 [4]          | Australia | mm     | CA | Complementary and alternative medicine | Women; migrants                                 | Maternal and perinatal health | A             | I      | TG          | 15  | BMHSU                                   | Theo         |
| Travers et al. 2020 [5]            | USA       | ql     | CA | Long-term care                         | Elderly individuals                             | No specific disease           | A             | I      | TG          | 470 | Ex-BMPF2002                             | Theo; DA     |
| Bascur-Castillo et al. 2019 [6]    | Chile     | ql     | P  | Urologic disease treatment             | Women                                           | Urologic diseases             | A             | I      | TG          | 10  | R-BMHSU1995                             | Theo; DA     |
| Briones-Vozmediano et al. 2019 [7] | Spain     | ql     | CA | General health care                    | Migrants                                        | Violence experience           | A             | I      | HP          | 28  | A&A1974                                 | DA           |
| Coleman 2019 [8]                   | USA       | ql     | P  | Mental health services                 | Migrants; men; individuals with mental disorder | Mental disorder               | D             | I      | TG          | 66  | BMHSU, R-BMHSU1995, A&N1973             | Theo         |
| Fleury et al. 2019 [9]             | Canada    | mm     | -  | Mental health services                 | Individuals with mental disorder                | Mental disorder               | A             | I      | TG          | 328 | R-BMHSU1995                             | Theo; DC; DA |
| Green et al. 2019 [10]             | USA       | ql     | CA | General health care                    | Men; individuals with HIV                       | HIV                           | A             | I      | TG          | 10  | BMHSU, R-BMHSU1995                      | DA           |
| Heidari et al. [11]                | Iran      | ql     | CA | Medication use                         | Individuals with arthritis                      | Arthritis                     | A             | I      | HP          | 47  | BMHSU2008                               | DC; DA       |
| Koche et al. 2019 [12]             | Nigeria   | ql     | -  | General health care                    | General population                              | No specific disease           | A             | I      | TG          | 24  | R-BMHSU1995, A&A1974, A&D2001, A&N2005  | DA           |
| Navarro-Millan et al. 2019 [13]    | UK        | ql     | -  | E-health                               | Individuals with specific disease               | Rheumatoid arthritis          | A             | FG     | TG          | 31  | A&N1973                                 | DC; DA       |
| Opoku et al. 2019 [14]             | Ghana     | ql     | CA | E-health                               | Individuals with non-communicable disease       | Non-communicable disease      | A             | I      | HP          | 13  | mhealth PNE                             | DA           |
| Perry et al. 2019 [15]             | USA       | ql     | TA | Preventive services                    | Individuals with low socio-economic status      | No specific disease           | A             | FG     | TG          | 235 | A&A1974                                 | Theo; DC; DA |
| Roberson et al. 2019 [16]          | USA       | ql     | GT | Natal care                             | Women; migrants, pregnant women                 | Maternal and perinatal health | A             | I      | TG          | 12  | R-BMHSU1995                             | Theo; DC     |
| Robinson et al. 2019 [17]          | UK        | ql     | FA | Oral health services                   | General population                              | Oral diseases                 | A             | FG; I  | TG, HP      | 34  | A&D1997                                 | DA           |



|                            |                 |    |      |                            |                                                        |                     |   |       |        |     |                    |              |
|----------------------------|-----------------|----|------|----------------------------|--------------------------------------------------------|---------------------|---|-------|--------|-----|--------------------|--------------|
| Schatz et al. 2019 [18]    | Uganda          | ql | CA   | STD treatment              | Individuals living in rural areas; elderly individuals | HIV                 | A | I     | TG, HP | 40  | R-BMHSU1995        | DA           |
| Gill et al. 2018 [19]      | UK              | ql | P    | Urologic disease treatment | Individuals with specific disease                      | Urologic diseases   | A | I     | TG     | 12  | R-BMHSU1995        | DA           |
| Grodensky et al. 2018 [20] | USA             | ql | TA   | Health insurance           | Men; individuals with incarceration                    | No specific disease | A | I     | TG     | 20  | BMVP2007           | Theo; DC; DA |
| Ko et al. 2018 [21]        | USA             | ql | CA   | Preventive services        | Women; mothers                                         | Viral Hepatitis     | A | FG    | TG     | 30  | R-BMHSU1995        | DC; DA       |
| Lor et al. 2018 [22]       | USA             | ql | -    | Screening                  | Migrants; women                                        | No specific disease | A | FG    | TG     | 58  | BMVP2000           | DA           |
| Mago et al. 2018 [23]      | Canada          | ql | P, E | Dental care                | Homeless                                               | No specific disease | A | I     | TG     | 25  | BMVP2000           | Theo; DA     |
| Riang'a et al. 2018 [24]   | Kenya           | mm | -    | Natal care                 | (Pregnant) Women; individuals living in rural areas    | No specific disease | A | I     | TG, HP | 64  | A&N1973            | DA           |
| Victor et al. 2018 [25]    | UK              | ql | CA   | General health care        | Elderly individuals; residents in care homes           | No specific disease | A | I     | TG     | 35  | A&N1973            | DC; DA       |
| Bayuo 2017 [26]            | Ghana           | ql | CA   | Outpatient care            | Elderly individuals                                    | No specific disease | A | I     | TG     | 16  | R-BMHSU1995        | Theo; DA     |
| Hawk et al. 2017 [27]      | USA             | ql | CA   | STD treatment              | Individuals with specific disease                      | HIV                 | A | I     | TG, HP | 40  | R-BMHSU1995        | Theo; DC; DA |
| Herrmann et al. 2017 [28]  | Norway; Germany | ql | GT   | General health care        | General population                                     | No specific disease | A | I; O  | TG     | 40  | R-BMHSU1995        | Theo         |
| Lee 2017 [29]              | USA             | mm | GT   | Screening                  | Migrants, women                                        | cancer              | D | I     | TG     | 30  | R-BMHSU1995        | Theo         |
| Levison et al. 2017 [30]   | USA             | ql | E    | STD treatment              | Migrants                                               | HIV                 | A | I     | TG, HP | 51  | BMVP2000           | DC           |
| Parkman et al. 2017 [31]   | UK              | ql | I    | Emergency department       | Individuals with specific disease                      | Addiction           | A | I     | TG     | 30  | R-BMHSU1995, BMHSU | Theo; DA     |
| Rice 2017 [32]             | USA             | ql | P    | Health insurance           | Individuals with incarceration                         | No specific disease | D | I     | TG     | 11  | BMVP2000           | Theo; DC     |
| Rodriguez et al. 2017 [33] | USA             | ql | -    | STD treatment              | Individuals living in rural areas                      | HIV                 | A | I     | HP     | 36  | A&D2001            | DA           |
| Tewari et al. 2017 [34]    | India           | mm | GT   | Mental health care         | Individuals living in rural areas                      | Mental disorders    | A | FG; I | HP     | 78  | R-BMHSU1995        | DA           |
| Velez et al. 2017 [35]     | USA             | ql | GT   | Dental care                | Migrants; women                                        | No specific disease | A | FG    | TG, HP | 103 | BMVP2000           | Theo; DA     |
| White 2017 [36]            | USA             | ql |      | Preventive services        | Men; migrants; young individuals                       | Cancer; CD          | D | I     | TG     | 12  | R-BMHSU1995        | Theo; DA     |
| Henson et al. 2016 [37]    | UK              | ql | CA   | Emergency department       | Individuals with specific disease                      | Cancer              | A | I     | TG, NK | 24  | A&N1973            | Theo; DC; DA |

|                                  |           |    |     |                                                 |                                   |                     |   |       |            |     |                                   |              |
|----------------------------------|-----------|----|-----|-------------------------------------------------|-----------------------------------|---------------------|---|-------|------------|-----|-----------------------------------|--------------|
| Kohno et al. 2016 [38]           | Malaysia  | ql | CA  | General health care                             | Migrants; elderly individuals     | No specific disease | A | FG; I | TG         | 38  | R-BMHSU1995                       | Theo; DA     |
| Maulik et al. 2016 [39]          | India     | mm | TA  | Mental health care                              | Individuals living in rural areas | Mental disorders    | A | FG; I | TG, HP     | 31  | R-BMHSU1995                       | DA           |
| Mukasa 2016 [40]                 | USA       | ql | P   | Natal care                                      | Migrants; women; mothers          | No specific disease | D | I     | TG         | 11  | R-BMHSU1995                       | Theo; DA     |
| Obikunle 2016 [41]               | USA       | ql | P   | Prevention, Screening                           | Women; migrants                   | Cancer              | D | I     | TG         | 14  | R-BMHSU1995                       | Theo; DA     |
| Rachlis et al. 2016 [42]         | Kenya     | ql | -   | Chronic care                                    | Individuals with specific disease | HIV; TB; CD         | A | FG; I | TG, HP, NK | 207 | A&N1973                           | DA           |
| Rachlis et al. 2016 [43]         | Kenya     | ql | CA  | Chronic care                                    | Individuals with specific disease | HIV; TB; CD         | A | FG; I | TG, HP     | 235 | A&N1973                           | DA           |
| Sperber et al. 2016 [44]         | USA       | ql | CA  | Cancer care, health insurance, genomic services | Veterans                          | Cancer              | A | I     | HP         | 58  | Ex-BMPF2002, UM1998               | DC; DA       |
| Thiessen et al. 2016 [45]        | Canada    | ql | CA  | Natal care                                      | (H)P                              | No specific disease | A | I     | HP         | 24  | A&A1974                           | DC; DA       |
| Blanas et al. 2015 [46]          | USA       | ql | GT  | Screening                                       | Migrants                          | Viral Hepatitis     | A | FG    | TG         | 39  | BMVP2000                          | Theo; DC; DA |
| Bradbury-Jones et al. 2015a [47] | UK        | mm | TA  | Natal care                                      | Women                             | No specific disease | A | FG    | HP         | 45  | Ex-BMPF2002, A&D2001              | Theo; DA     |
| Bradbury-Jones et al. 2015b [48] | Scotland  | ql | R&S | Natal care                                      | Women; victims of violence        | No specific disease | A | I     | TG         | 5   | R-BMHSU1995, Ex-BMPF2002, A&D2001 | Theo; DA     |
| Coe et al. 2015 [49]             | USA       | ql | CA  | Medication use                                  | Homeless                          | No specific disease | A | DocA  | TG         | 426 | BMVP2000                          | Theo         |
| Condellius et al. 2015 [50]      | Sweden    | ql | CA  | General health care                             | Elderly individuals               | No specific disease | A | I     | NK         | 14  | A&A1974                           | Theo; DC; DA |
| Conner et al. 2015 [51]          | USA       | ql | P   | End-of-life care                                | Informal caregivers; (H)P         | No specific disease | A | FG    | TG, HP     | 53  | R-BMHSU1995                       | Theo         |
| Holtzman et al. 2015 [52]        | USA       | ql | GT  | STD treatment                                   | Individuals with specific disease | HIV                 | A | I     | TG         | 51  | R-BMHSU1995                       | Theo; DA     |
| Nowgesic 2015 [53]               | Canada    | ql | E   | STD treatment                                   | Indigenous people                 | HIV                 | D | I; O  | TG, HP     | 41  | BMHSU2008                         | DC; DA       |
| Porteous et al. 2015 [54]        | Scotland  | ql | TA  | Self-care                                       | Individuals with specific disease | No specific disease | A | I     | TG         | 24  | R-BMHSU1995, BMHSU2008            | Theo; DC; DA |
| Richards 2015 [55]               | Grenada   | ql | P   | Screening                                       | Women                             | Cancer              | D | I     | TG         | 8   | BMHSU2008                         | Theo; DC; DA |
| Cathers 2014 [56]                | USA       | ql | P   | Outpatient care                                 | (Health) professionals            | Addiction           | D | I     | TG         | 5   | BMVP2000                          | Theo; DA     |
| Serna 2014 [57]                  | USA       | mm | CA  | Dental care                                     | Migrants                          | Oral diseases       | D | I     | TG         | 14  | R-BMHSU1995, BMHSU                | Theo; DC     |
| Artuso et al. 2013[58]           | Australia | ql | TCM | General health care                             | Migrants                          | CD                  | A | FG; I | TG, HP, NK | 21  | R-BMHSU1995                       | Theo         |

|                           |             |    |     |                          |                                                     |                     |   |       |            |     |                                      |              |
|---------------------------|-------------|----|-----|--------------------------|-----------------------------------------------------|---------------------|---|-------|------------|-----|--------------------------------------|--------------|
| Doshi et al. 2013 [59]    | USA         | ql | GT  | Screening                | Men; migrants                                       | HIV                 | A | I     | TG         | 78  | R-BMHSU1995                          | DC; DA       |
| Han et al. 2013 [60]      | USA         | ql | GT  | Prevention, Screening    | Individuals with specific disease                   | Viral Hepatitis     | A | I     | HP         | 20  | A&A1974                              | Theo; DC; DA |
| Majaj et al. 2013 [61]    | Palestine   | ql | -   | General health care      | Women; individuals living in rural areas            | No specific disease | A | I     | TG, HP     | 37  | R-BMHSU1995                          | DC; DA       |
| Noh 2013 [62]             | USA         | ql | CA  | End-of-life-care         | Elderly individuals; migrants                       | No specific disease | A | I     | TG         | 28  | BMVP2000                             | Theo; DC; DA |
| Scott 2013 [63]           | USA         | mm | CA  | Cancer care              | Migrants                                            | Cancer              | D | FG; I | TG, HP, NK | 29  | BMVP2000                             | Theo         |
| Boateng et al. 2012 [64]  | Netherlands | ql | CA  | General health care      | Migrants                                            | No specific disease | A | FG    | TG         | 51  | R-BMHSU1995                          | DC; DA       |
| Callahan 2012 [65]        | USA         | mm | CA  | Cancer care              | Individuals with specific disease                   | Cancer              | D | I     | TG         | 7   | BMVP2000                             | Theo         |
| Dergal 2012 [66]          | Canada      | mm | GT  | Nursing                  | Caregivers                                          | No specific disease | D | I     | TG         | 10  | A&N1973                              | Theo; DA     |
| Chiu 2011 [67]            | USA         | ql | E   | General health care      | Migrants, elderly individuals                       | No specific disease | D | I     | TG         | 18  | R-BMHSU1995                          | Theo; DC     |
| Corboy et al. 2011 [68]   | Australia   | mm | A&S | Mental health care       | Men; individuals living in rural areas              | Cancer              | A | I     | TG, HP     | 12  | R-BMHSU1995                          | DA           |
| Goh 2011 [69]             | Singapore   | mm | P   | Post-acute care services | Elderly individuals                                 | No specific disease | A | I     | TG, HP, NK | 29  | R-BMHSU1995, A&N1973, A&A1974, BMHSU | DA           |
| Chiu 2010 [70]            | USA         | ql | E   | E-health                 | Migrants; caregivers                                | Dementia            | D | I     | TG         | 14  | R-BMHSU1995, A&N1973                 | Theo; DC     |
| Gräßel et al. 2010 [71]   | Germany     | mm | CA  | Caregiver counselling    | Informal caregiver                                  | No specific disease | A | Q     | NK         | 306 | A&N1973                              | Theo; DC; DA |
| Rööst et al. 2009 [72]    | Bolivia     | ql | AI  | Natal care               | Women; survivors of a severe pregnancy complication | No specific disease | A | I     | TG         | 30  | R-BMHSU1995                          | Theo         |
| Andrasik et al. 2008 [73] | USA         | ql | CA  | Screening                | Women; individuals with low socio-economic status   | HIV                 | A | I     | TG         | 35  | R-BMHSU1995                          | Theo; DA     |
| Butler et al. 2008 [74]   | USA         | ql | -   | General health care      | Women; individuals living in rural area             | No specific disease | A | I     | TG         | 8   | R-BMHSU1995                          | Theo; DA     |
| Herrera et al. 2008 [75]  | USA         | mm | -   | Longterm care            | Migrants                                            | No specific disease | A | I     | NK         | 66  | R-BMHSU1995                          | Theo; DC; DA |
| Bradley et al. 2002 [76]  | USA         | ql | GT  | Longterm care            | Women; migrants; elderly individuals                | Mental disorders    | A | FG    | TG         | 96  | R-BMHSU1995                          | Theo         |
| Go et al. 2002 [77]       | Vietnam     | ql | -   | STD treatment            | Women                                               | STD                 | A | I     | TG         | 36  | R-BMHSU1995                          | DC; DA       |

Country – UK: United Kingdom, USA: United States of America

Methods – mm: mixed-method study; ql: qualitative study

Methodological orientation: CA: Content analysis; E: Ethnography; GT: Ground Theory; P: Phenomenology; I: Iterative Categorisation; TA: Thematic analysis; AI: Analytic induction; A&S: Coding & Analysis Auerbach & Silverstein; TCM: Miles and Huberman's conceptual matrix (TCM); R&S: Framework analysis of Ritchie and Spencer; FA: Framework analysis

Disease of interest – TB: tuberculosis; STD: Sexually transmitted diseases

Data collection – I: Interview, FG: Focus group, O: Observation, DocA: Document analysis, Q: Questionnaire

Respondents – TG: target group, HP: Health professionals, NK: next of kin

Document type – A: Article, D: Dissertation

Model – BMHSU: Andersen 1968 [78]; A&N1973: Andersen and Newman's Framework of Viewing Health Services Utilization [79]; A&A1974: Aday and Andersen's Framework for the study of access to medical care [80]; R-BMHSU1995: Andersen 1995 [81]; A&D1997: Ethnicity, aging, and oral health outcomes: a conceptual framework [82]; UM1998: Phillips, Morrison, Andersen & Aday – Utilization Model [83]; BMVP2000: Behavioral Model for Vulnerable Populations [84]; A&D2001: Behavioral Model of Health Services Use including contextual and individual characteristics [85]; Ex-BMPF2002: expanded Andersen model with psychosocial factors in Long-Term Care [76]; A&N2005: Andersen & Newman Individual Determinants of Health Service Utilization; BMVP2007: Stein, Andersen & Gelberg [86]; BMHSU2008 Andersen 2008 [87]; A&D&B 2013: A behavioral model of health services use including contextual and individual characteristics [88]; mhealth PNE framework [89]

Theo: Theoretical background, DC: Data collection, DA: Data analysis

## REFERENCES

- 1 Chao Y.-Y., Seo J.Y., Katigbak C., et al. Utilization of Mental Health Services Among Older Chinese Immigrants in New York City. *Community Ment Health J* 2020.
- 2 Due C., Aldam I., Ziersch A. Understanding oral health help-seeking among Middle Eastern refugees and asylum seekers in Australia: An exploratory study. *Community Dent Oral Epidemiol* 2020.
- 3 Isaak C.A., Mota N., Medved M., et al. Conceptualizations of help-seeking for mental health concerns in First Nations communities in Canada: A comparison of fit with the Andersen Behavioral Model. *Transcult Psychiatry* 2020. <http://tps.sagepub.com/content/by/year>.
- 4 Shewamene Z, Dune T, Smith CA. Use of traditional and complementary medicine for maternal health and wellbeing by African migrant women in Australia: a mixed method study. *BMC Complement Med Ther* 2020;20(1):60.
- 5 Travers J.L., Hirschman K.B., Naylor M.D. Adapting Andersen's expanded behavioral model of health services use to include older adults receiving long-term services and supports. *BMC Geriatr* 2020;20(1):58.
- 6 Bascur-Castillo C, Araneda-Gatica V, Castro-Arias H, et al. Determinants in the process of seeking help for urinary incontinence in the Chilean health system. *Int J Gynaecol Obstet* 2019;144(1):103–11.
- 7 Briones-Vozmediano E., Castellanos-Torres E., Goicolea I., et al. Challenges to Detecting and Addressing Intimate Partner Violence Among Roma Women in Spain: Perspectives of Primary Care Providers. *J Interpers Violence* 2019;886260519872299.
- 8 Coleman TM. Help-seeking experiences of African American men with depression 2019.
- 9 Fleury M.-J., Grenier G., Farand L., et al. Reasons for Emergency Department Use among Patients with Mental Disorders. *Psychiatr Q* 2019;90(4):703–16. <http://www.wkap.nl/journalhome.htm/0033-2720>.
- 10 Green D.C., Wheeler E.M. A Qualitative Exploration of Facilitators for Health Service Use among Aging Gay Men Living with HIV. *J. Int. Assoc. Providers AIDS Care* 2019;18. <http://jia.sagepub.com/content/by/year>.
- 11 Heidari P., Cross W., Weller C., et al. Rheumatologists' insight into medication adherence in patients with rheumatoid arthritis: A qualitative study. *Int. J. Rheum. Dis.* 2019;22(9):1695–705. [http://onlinelibrary.wiley.com/journal/10.1111/\(ISSN\)1756-185X](http://onlinelibrary.wiley.com/journal/10.1111/(ISSN)1756-185X).
- 12 Koce F, Randhawa G, Ochieng B. Understanding healthcare self-referral in Nigeria from the service users' perspective: a qualitative study of Niger state. *BMC Health Serv Res* 2019;19(1):209.

- 1  
2  
3 13 Navarro-Millan I, Zinski A, Shurbaji S, et al. Perspectives of Rheumatoid Arthritis Patients on Electronic Communication and Patient-Reported Outcome Data Collection: A Qualitative Study. *Arthritis Care and Research* 2019;71(1):80–87.
- 4  
5 14 Opoku D, Busse R, Quentin W. Achieving Sustainability and Scale-Up of Mobile Health Noncommunicable Disease Interventions in Sub-Saharan Africa: Views of Policy Makers in Ghana. *JMIR Mhealth Uhealth* 2019;7(5):e11497.
- 6  
7 15 Perry R, Gard Read J, Chandler C, et al. Understanding Participants' Perceptions of Access to and Satisfaction With Chronic Disease Prevention Programs. *Health Educ Behav* 2019;1090198118822710.
- 8  
9 16 Roberson M.C. Refusal of epidural anesthesia for labor pain management by African American parturients: An examination of factors. *AANA J.* 2019;87(4):299–304.  
10 <https://www.aana.com/publications/aana-journal>.
- 11 17 Robinson P.G., Douglas G.V.A., Gibson B.J., et al. Remuneration of primary dental care in England: A qualitative framework analysis of perspectives of a new service delivery model incorporating incentives for improved access, quality and health outcomes. *BMJ Open* 2019;9(10):e031886. <http://bmjopen.bmj.com/content/early/by/section>.
- 12  
13 18 Schatz E, Seeley J, Negin J, et al. "For us here, we remind ourselves": strategies and barriers to ART access and adherence among older Ugandans. *BMC Public Health* 2019;19(1):131.
- 14  
15 19 Gill P, Logan K, John B, et al. Participants' experiences of ketamine bladder syndrome: A qualitative study. *International Journal of Urological Nursing* 2018;12(2/3):76–83. <http://www.redi-bw.de/db/ebSCO.php/search.ebscohost.com/login.aspx%3fdirect%3dtrue%26db%3dcin20%26AN%3d132481296%26site%3dehost-live>.
- 16  
17 20 Grodensky CA, Rosen DL, Blue CM, et al. Medicaid Enrollment among Prison Inmates in a Non-expansion State: Exploring Predisposing, Enabling, and Need Factors Related to Enrollment Pre-incarceration and Post-Release. *Journal of urban health: bulletin of the New York Academy of Medicine* 2018;95(4):454–66.
- 18  
19 21 Ko LK, Taylor VM, Mohamed FB, et al. "We brought our culture here with us": A qualitative study of perceptions of HPV vaccine and vaccine uptake among East African immigrant mothers. *Papillomavirus Res* 2018;7:21–25.
- 20  
21 22 Lor B, Ornelas IJ, Magarati M, et al. We Should Know Ourselves: Burmese and Bhutanese Refugee Women's Perspectives on Cervical Cancer Screening. *J Health Care Poor Underserved* 2018;29(3):881–97.
- 22  
23 23 Mago A, MacEntee MI, Brondani M, et al. Anxiety and anger of homeless people coping with dental care. *Community Dent Oral Epidemiol* 2018;46(3):225–30.
- 24  
25 24 Rianga'a RM, Nangulu AK, Broerse JEW. "I should have started earlier, but I was not feeling ill!" Perceptions of Kalenjin women on antenatal care and its implications on initial access and differentials in patterns of antenatal care utilization in rural Uasin Gishu County Kenya. *PLoS ONE* 2018;13(10):e0202895.
- 26  
27 25 Victor C, Davies S, Dickinson A, et al. "It just happens". Care home residents' experiences and expectations of accessing GP care. *Arch Gerontol Geriatr* 2018;79:97–103.
- 28  
29 26 Bayuo J. Experiences with out-patient hospital service utilisation among older persons in the Asante Akyem North District- Ghana. *BMC Health Serv Res* 2017;17(1):652.
- 30  
31 27 Hawk M, Coulter RWS, Egan JE, et al. Exploring the Healthcare Environment and Associations with Clinical Outcomes of People Living with HIV/AIDS. *AIDS Patient Care STDS* 2017;31(12):495–503.
- 32  
33 28 Herrmann WJ, Haarmann A, Bærheim A. A sequential model for the structure of health care utilization. *PLoS ONE* 2017;12(5):e0176657.
- 34  
35 29 Lee MH. Breast cancer screening behavior in Korean immigrant women in the United States 2017.
- 36  
37 30 Levison JH, Bogart LM, Khan IF, et al. "Where It Falls Apart": Barriers to Retention in HIV Care in Latino Immigrants and Migrants. *AIDS Patient Care STDS* 2017;31(9):394–405.
- 38  
39 31 Parkman T, Neale J, Day E, et al. Qualitative exploration of why people repeatedly attend emergency departments for alcohol-related reasons. *BMC Health Serv Res* 2017;17(1):140.
- 40  
41 32 Rice MB. Attitudes of women offenders towards medicaid enrollment and coverage under the Affordable Care Act 2017.
- 42  
43 33 Rodriguez HR, Dobalian A. Provider and Administrator Experiences With Providing HIV Treatment and Prevention Services in Rural Areas. *AIDS Educ Prev* 2017;29(1):77–91.
- 44  
45 34 Tewari A, Kallakuri S, Devarapalli S, et al. Process evaluation of the systematic medical appraisal, referral and treatment (SMART) mental health project in rural India. *BMC Psychiatry* 2017;17(1):385.
- 46  
35 35 Velez D, Palomo-Zerfas A, Nunez-Alvarez A, et al. Facilitators and Barriers to Dental Care Among Mexican Migrant Women and Their Families in North San Diego County. *J Immigr Minor Health* 2017;19(5):1216–26.

- 1  
2  
3 36 White AW. The role of social and cultural factors on preventive health service use among young, rural, African American men: A narrative inquiry 2017.
- 4 37 Henson LA, Higginson IJ, Daveson BA, et al. 'I'll be in a safe place': a qualitative study of the decisions taken by people with advanced cancer to seek emergency department care. *BMJ Open* 2016;6(11).  
5  
6 <http://gateway.webofknowledge.com/gateway/Gateway.cgi?GWVersion=2&SrcAuth=SwissAcademicSoftware&SrcApp=Citavi&DestLinkType=FullRecord&DestApp=WOS&KeyUT=000391303400076>.
- 7  
8 38 Kohno A, Nik Farid ND, Musa G, et al. Factors affecting Japanese retirees' healthcare service utilisation in Malaysia: a qualitative study. *BMJ Open* 2016;6(3):e010668.
- 9 39 Maulik PK, Tewari A, Devarapalli S, et al. The Systematic Medical Appraisal, Referral and Treatment (SMART) Mental Health Project: Development and Testing of Electronic Decision Support System and Formative Research to Understand Perceptions about Mental Health in Rural India. *PLoS ONE* 2016;11(10):e0164404.
- 10  
11 40 Mukasa B. Maternal and child health access disparities among recent African immigrants in the United States 2016.
- 12 41 Obikunle AF. Barriers to breast cancer prevention and screening among African American women 2016.
- 13 42 Rachlis B, Naanyu V, Wachira J, et al. Community Perceptions of Community Health Workers (CHWs) and Their Roles in Management for HIV, Tuberculosis and Hypertension in Western Kenya. *PLoS ONE* 2016;11(2):e0149412.
- 14  
15 43 Rachlis B, Naanyu V, Wachira J, et al. Identifying common barriers and facilitators to linkage and retention in chronic disease care in western Kenya. *BMC Public Health* 2016;16:741.
- 16 44 Sperber NR, Andrews SM, Voils CI, et al. Barriers and Facilitators to Adoption of Genomic Services for Colorectal Care within the Veterans Health Administration. *J Pers Med* 2016;6(2).
- 17 45 Thiessen K, Heaman M, Mignone J, et al. Barriers and facilitators related to implementation of regulated midwifery in Manitoba: a case study. *BMC Health Serv Res* 2016;16:1–22.  
18 <http://www.redi-bw.de/db/ebSCO.php/search.ebscohost.com/login.aspx?direct=true&db=cin2026AN%3d113906425%26site%3dehost-live>.
- 19 46 Blanas DA, Nichols K, Bekele M, et al. Adapting the Andersen model to a francophone West African immigrant population: hepatitis B screening and linkage to care in New York City. *J Community Health* 2015;40(1):175–84.
- 20  
21 47 Bradbury-Jones C, Breckenridge JP, Devaney J, et al. Priorities and strategies for improving disabled women's access to maternity services when they are affected by domestic abuse: a multi-method study using concept maps. *BMC Pregnancy Childbirth* 2015;15:350.
- 22 48 Bradbury-Jones C, Breckenridge JP, Devaney J, et al. Disabled women's experiences of accessing and utilising maternity services when they are affected by domestic abuse: a critical incident technique study. *BMC Pregnancy Childbirth* 2015;15:181.
- 23  
24 49 Coe AB, Moczygamba LR, Gatewood SBS, et al. Medication adherence challenges among patients experiencing homelessness in a behavioral health clinic. *Res Social Adm Pharm* 2015;11(3):e110-20.
- 25  
26 50 Condelius A, Andersson M. Exploring access to care among older people in the last phase of life using the behavioural model of health services use: a qualitative study from the perspective of the next of kin of older persons who had died in a nursing home. *BMC Geriatr* 2015;15:138.
- 27  
28 51 Conner NE, Chase SK. Decisions and caregiving: End of life among Blacks from the perspective of informal caregivers and decision makers. *Am J Hosp Palliat Care* 2015;32(4):454–63.  
29 <http://www.redi-bw.de/db/ebSCO.php/search.ebscohost.com/login.aspx?direct=true&db=psyh%26AN%3d2015-21262-013%26site%3dehost-live>.
- 30 52 Holtzman CW, Shea JA, Glanz K, et al. Mapping patient-identified barriers and facilitators to retention in HIV care and antiretroviral therapy adherence to Andersen's Behavioral Model. *AIDS Care* 2015;27(7):817–28.
- 31  
32 53 Nowgesic EF. Antiretroviral Therapy Access, Acceptance and Adherence among Urban Indigenous Peoples Living with HIV in Saskatchewan: The Indigenous Red Ribbon Storytelling Study 2015.
- 33  
34 54 Porteous T, Wyke S, Hannaford P, et al. Self-care behaviour for minor symptoms: can Andersen's Behavioral Model of Health Services Use help us to understand it? *Int J Pharm Pract* 2015;23(1):27–35.
- 35  
36 55 Richards C. Women's experiences with the follow-up system for cervical cancer in a developing country. 76 2015.
- 37  
38  
39  
40  
41  
42  
43  
44  
45  
46

- 1  
2  
3 56 Cathers LA. Exploring substance use disorders community outpatient counselors' experiences treating clients with co-occurring medical conditions: An interpretative phenomenological analysis 2014.
- 4  
5 57 Serna CA. Exploring oral health problems in adult hispanic migrant farmworkers: A mixed-methods approach 2014.
- 6 58 Artuso S, Cargo M, Brown A, et al. Factors influencing health care utilisation among Aboriginal cardiac patients in central Australia: a qualitative study. *BMC Health Serv Res* 2013;13:83.
- 7 59 Doshi RK, Malebranche D, Bowleg L, et al. Health care and HIV testing experiences among Black men in the South: implications for "Seek, Test, Treat, and Retain" HIV prevention strategies. *AIDS Patient Care STDS* 2013;27(2):123–33.
- 8  
9 60 Han H, Perumalswami P, Kleinman L, et al. Voices of multi-ethnic providers in NYC: Health care for viral hepatitis. *Hepatology* 2013;Conference 64th Annual Meeting of the American Association for the Study of Liver Diseases The Liver Meeting 2013. Washington, DC United States. Conference Publication:1195A-1196A.  
10 <http://ovidsp.ovid.com/ovidweb.cgi?T=JS&CSC=Y&NEWS=N&PAGE=fulltext&D=emed14&AN=71238042>.
- 11  
12 61 Majaj L, Nassar M, Allegri M. "It's not easy to acknowledge that I'm ill": a qualitative investigation into the health seeking behavior of rural Palestinian women. *BMC Womens Health* 2013;13.  
13 <http://gateway.webofknowledge.com/gateway/Gateway.cgi?GWVersion=2&SrcAuth=SwissAcademicSoftware&SrcApp=Citavi&DestLinkType=FullRecord&DestApp=WOS&KeyUT=000320055000001>.
- 14  
15 62 Noh H. Terminally ill Black elders: Making the choice to receive hospice care 2013.
- 16 63 Scott KL. Delay to treatment for Latinos diagnosed with lung and head-and-neck cancers: Application of the behavioral model for vulnerable populations 2013.
- 17 64 Boateng L, Nicolaou M, Dijkshoom H, et al. An exploration of the enablers and barriers in access to the Dutch healthcare system among Ghanaians in Amsterdam. *BMC Health Serv Res* 2012;12:75.
- 18  
19 65 Callahan CC. Cancer, vulnerability, and financial quality of life: A mixed methods study 2012.
- 20 66 Dergal J. Family members' use of private companions in nursing homes: A mixed methods study 2012.
- 21 67 Chiu MWY. Psychosocial responses to falling in older Chinese immigrants living in the community 2011.
- 22 68 Corboy D, McDonald J, McLaren S. Barriers to accessing psychosocial support services among men with cancer living in rural Australia: Perceptions of men and health professionals. *Int J Mens Health* 2011;10(2):163–83. <http://www.redi-bw.de/db/ebSCO.php/search.ebscohost.com/login.aspx%3fdirect%3dtrue%26db%3dpsyh%26AN%3d2011-21872-004%26site%3dehost-live>.
- 23  
24 69 Goh SN. Post Acute Care of the Elderly in Singapore What Factors Influence Use of Services? *Asia Pacific Journal of Social Work and Development* 2011;21(1):31–53.  
25 <http://gateway.webofknowledge.com/gateway/Gateway.cgi?GWVersion=2&SrcAuth=SwissAcademicSoftware&SrcApp=Citavi&DestLinkType=FullRecord&DestApp=WOS&KeyUT=000292427400004>.
- 26  
27 70 Chiu TML. Usage and Non-usage Behaviour of eHealth Services Among Chinese Canadians Caring for a Family Member with Dementia 2008.
- 28 71 Gräßel E, Luttenberger K, Trilling A, et al. Counselling for dementia caregivers-predictors for utilization and expected quality from a family caregiver's point of view. *Eur J Ageing* 2010;7(2):111–19.
- 29  
30 72 Rööst M, Jonsson C, Liljestrand J, et al. Social differentiation and embodied dispositions: a qualitative study of maternal care-seeking behaviour for near-miss morbidity in Bolivia. *Reprod Health* 2009;6:13.
- 31  
32 73 Andrasik MP, Rose R, Pereira D, et al. Barriers to cervical cancer screening among low-income HIV-positive African American women. *J Health Care Poor Underserved* 2008;19(3):912–25.
- 33 74 Butler C, Kim-Godwin Y, Fox JA. Exploration of health care concerns of Hispanic women in a rural southeastern North Carolina community. *Online Journal of Rural Nursing and Health Care* 2008;8(2):22–32.
- 34  
35 75 Herrera AP, Lee J, Palos G, et al. Cultural influences in the patterns of long-term care use among Mexican American family caregivers. *J Appl Gerontol* 2008;27(2):141–65. <http://www.redi-bw.de/db/ebSCO.php/search.ebscohost.com/login.aspx%3fdirect%3dtrue%26db%3dpsyh%26AN%3d2008-03902-002%26site%3dehost-live>.
- 36  
37 76 Bradley EH, McGraw SA, Curry L, et al. Expanding the Andersen model: the role of psychosocial factors in long-term care use. *Health Services Research* 2002;37(5):1221–42.
- 38 77 Go VF-I, Quan VM, Chung A, et al. Gender gaps, gender traps: sexual identity and vulnerability to sexually transmitted diseases among women in Vietnam. *Soc Sci Med* 2002;55(3):467–81.
- 39  
40  
41  
42  
43  
44  
45  
46

- 1  
2  
3 78 Andersen R. A behavioral model of families' use of health services. Chicago, Ill.: Univ. of Chicago 1968.
- 4 79 Andersen R, Newman JF. Societal and individual determinants of medical care utilization in the United States. *Milbank Mem Fund Q Health Soc* 1973;51(1):95–124.
- 5 80 Aday LA, Andersen R. A framework for the study of access to medical care. *Health Services Research* 1974;9(3):208–20.
- 6 81 Andersen RM. Revisiting the Behavioral Model and Access to Medical Care: Does it Matter? *J Health Soc Behav* 1995;36(1):1–10.
- 7 82 Andersen RM, Davidson PL. Ethnicity, aging, and oral health outcomes: a conceptual framework. *Adv Dent Res* 1997;11(2):203–09.
- 8 83 Phillips KA, Morrison KR, Andersen R, et al. Understanding the context of healthcare utilization: assessing environmental and provider-related variables in the behavioral model of utilization. *Health Services Research* 1998;33(3):571–96.
- 9  
10 84 Gelberg L, Andersen RM, Leake B. The Behavioral Model for Vulnerable Populations: Application to Medical Care Use and Outcomes for Homeless People. *Health Services Research*  
11 2000;34(6) (accessed 13 Sep 2018).
- 12 85 Andersen RM, Davidson PL. Improving access to care in America. In: Andersen R, Kominski GF, Rice TH, eds. *Changing the US health care system: Key issues in health services, policy,*  
13 *and management*, 2nd edn. San Francisco: Jossey-Bass 2001:3–31.
- 14 86 Stein JA, Andersen R, Gelberg L. Applying the Gelberg-Andersen behavioral model for vulnerable populations to health services utilization in homeless women. *J Health Psychol*  
15 2007;12(5):791–804.
- 16 87 Andersen RM. National Health Surveys and the Behavioral Model of Health Services Use. *Med Care* 2008;46(7):647–53.
- 17 88 Andersen RM, Davidson PL, Baumeister SE. Improving Acces to Care. In: Kominski GF, ed. *Changing the U.S. health care system: Key issues in health services policy and management,*  
18 *4th edn*. San Francisco, California: Jossey-Bass 2013:33–69.
- 19 89 Opoku D, Scott P, Quentin W. Healthcare Professionals' Perceptions of the Benefits and Challenges of a Teleconsultation Service in the Amansie-West District of Ghana. *Telemedicine*  
20 *journal and e-health the official journal of the American Telemedicine Association* 2015;21(9):748–55.
- 21  
22  
23  
24  
25  
26  
27  
28  
29  
30  
31  
32  
33  
34  
35  
36  
37  
38  
39  
40  
41  
42  
43  
44  
45  
46



# BMJ Open

## Application of Andersen's Behavioral Model of Health Services Use – A scoping review with a focus on qualitative health services research

|                                 |                                                                                                                                                                                                                                                                   |
|---------------------------------|-------------------------------------------------------------------------------------------------------------------------------------------------------------------------------------------------------------------------------------------------------------------|
| Journal:                        | <i>BMJ Open</i>                                                                                                                                                                                                                                                   |
| Manuscript ID                   | bmjopen-2020-045018.R2                                                                                                                                                                                                                                            |
| Article Type:                   | Original research                                                                                                                                                                                                                                                 |
| Date Submitted by the Author:   | 02-Apr-2021                                                                                                                                                                                                                                                       |
| Complete List of Authors:       | Lederle, Mareike; Pädagogische Hochschule Freiburg, Public Health and Health Education<br>Tempes, Jana; Pädagogische Hochschule Freiburg, Public Health and Health Education<br>Bitzer, Eva; Pädagogische Hochschule Freiburg, Public Health and Health Education |
| <b>Primary Subject Heading</b>: | Public health                                                                                                                                                                                                                                                     |
| Secondary Subject Heading:      | Health services research, Qualitative research                                                                                                                                                                                                                    |
| Keywords:                       | Organisation of health services < HEALTH SERVICES ADMINISTRATION & MANAGEMENT, Quality in health care < HEALTH SERVICES ADMINISTRATION & MANAGEMENT, HEALTH SERVICES ADMINISTRATION & MANAGEMENT, PUBLIC HEALTH, QUALITATIVE RESEARCH                             |
|                                 |                                                                                                                                                                                                                                                                   |

SCHOLARONE™  
Manuscripts

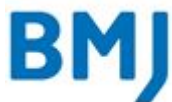

I, the Submitting Author has the right to grant and does grant on behalf of all authors of the Work (as defined in the below author licence), an exclusive licence and/or a non-exclusive licence for contributions from authors who are: i) UK Crown employees; ii) where BMJ has agreed a CC-BY licence shall apply, and/or iii) in accordance with the terms applicable for US Federal Government officers or employees acting as part of their official duties; on a worldwide, perpetual, irrevocable, royalty-free basis to BMJ Publishing Group Ltd ("BMJ") its licensees and where the relevant Journal is co-owned by BMJ to the co-owners of the Journal, to publish the Work in this journal and any other BMJ products and to exploit all rights, as set out in our [licence](#).

The Submitting Author accepts and understands that any supply made under these terms is made by BMJ to the Submitting Author unless you are acting as an employee on behalf of your employer or a postgraduate student of an affiliated institution which is paying any applicable article publishing charge ("APC") for Open Access articles. Where the Submitting Author wishes to make the Work available on an Open Access basis (and intends to pay the relevant APC), the terms of reuse of such Open Access shall be governed by a Creative Commons licence – details of these licences and which [Creative Commons](#) licence will apply to this Work are set out in our licence referred to above.

Other than as permitted in any relevant BMJ Author's Self Archiving Policies, I confirm this Work has not been accepted for publication elsewhere, is not being considered for publication elsewhere and does not duplicate material already published. I confirm all authors consent to publication of this Work and authorise the granting of this licence.

1  
2  
3 **Application of Andersen’s Behavioral Model of Health Services Use – A**  
4  
5 **scoping review with a focus on qualitative health services research**  
6  
7

8 Lederle, Mareike\*<sup>1</sup>; Tempes, Jana\*<sup>1</sup>; Bitzer, Eva-Maria <sup>1</sup>  
9

10  
11  
12  
13  
14 \* shared first authorship  
15

16  
17 1 Department of Public Health and Health Education, University of Education Freiburg  
18  
19  
20  
21  
22  
23  
24

25 Corresponding Address:  
26

27  
28 Mareike Lederle  
29

30 University of Education Freiburg  
31

32  
33 Kunzenweg 21  
34

35  
36 79117 Freiburg  
37

38  
39 Germany  
40

41  
42 mareike.lederle@ph-freiburg.de  
43

44  
45 +49 761 682-296  
46

47 **Keywords**  
48

49  
50 Behavioral Model of Health Services Use, health services utilization, enabling factors,  
51  
52 predisposing factors, need factors, scoping review, qualitative research  
53  
54

55  
56 **Word Count: 4,516**  
57  
58  
59  
60

## Abstract

Introduction: Qualitative methods have become integral in health services research, and Andersen's Behavioral Model of Health Services Use (BMHSU) is one of the most commonly employed models of health service utilization. The model focuses on three core factors to explain health care utilization: predisposing, enabling, and need factors. A recent overview of the application of the BMHSU is lacking, particularly regarding its application in qualitative research. Therefore, we provide a) a descriptive overview of the application of the BMHSU in health services research in general and b) a qualitative synthesis on the (un)suitability of the model in qualitative health services research.

Methods: We searched five databases from March to April 2019, and in April 2020. For inclusion, each study had to focus on individuals  $\geq 18$  years of age and to cite the BMHSU, a modified version of the model, or the three core factors that constitute the model, regardless of study design, or publication type. We used MS Excel® to perform descriptive statistics, and applied MAXQDA 2020® as part of a qualitative content analysis.

Results: From a total of 6,319 results, we identified 1,879 publications dealing with the BMHSU. The main methodological approach was quantitative (89%). More than half of the studies are based on the BMHSU from 1995. 77 studies employed a qualitative design, the BMHSU was applied to justify the theoretical background (62%), structure the data collection (40%), and perform data coding (78%). Various publications highlight the usefulness of the BMHSU for qualitative data, while others criticize the model for several reasons (e.g. its lack of cultural or psychosocial factors).

Conclusions: The application of different and older models of health care utilization hinders comparative health services research. Future research should consider quantitative or qualitative study designs and account for the most current and comprehensive model of the BMHSU.

## Article summary

### Strengths and limitations of the study:

This review

- explores the application of the widely adopted Behavioral Model of Health Services Use without limiting the search on target group, care setting, or disease.
- might have missed studies that did not mention the Behavioral Model of Health Services Use, or the three core factors in the title and abstract of the publications.
- gives insights to the application of the Behavioral Model of Health Services Use in qualitative research which have received little attention so far.

### Introduction

Health care utilization refers to the use of the health care system “by persons for the purpose of preventing and curing health problems, promoting maintenance of health and well-being, or obtaining information about one’s health status and prognosis” [1]. A needs-based health care system meets the needs of a person objectively identified by (health) professionals and considers the demands of an individual. If this interaction is successful, overuse, underuse, and misuse of health care systems can be avoided. Otherwise, there is the possibility of compromising the health of an individual and placing burden on the health care system [2]. To avoid overuse, underuse, and misuse of the health care system, it is important to consider the (non-)use of health care services, which is determined by a variety of contextual and individual factors [3]. As a measurable construct, health care service utilization is primarily determined through quantitative surveys. To explore individual demands, qualitative methods can provide important and rich information within the field of health services research [4, 5]. Various models have been developed across a variety of disciplines to explore and predict individuals' intentions and behaviors as they utilize health care services [6]. In health services

1  
2 research, the Behavioral Model of Health Services Use (BMHSU) is the most frequently cited  
3  
4 model of health care service utilization [6]. The model was developed by R.M. Andersen in  
5  
6 1968, and was based on a national quantitative survey that aimed to understand families' use  
7  
8 of health services [7, 8]. The model focuses on three core factors to explain health care  
9  
10 utilization: predisposing factors (e.g., age, education), enabling factors (e.g., income, hospital  
11  
12 density), and need factors (e.g., health status) [8].  
13  
14  
15

16 In recent years, Andersen's initial behavioral model has undergone continuous development,  
17  
18 where new focus was placed on various factors [8–10], such as 'consumer satisfaction' in the  
19  
20 1970s [11, 12], and 'health status', 'personal health practice', and 'external environment' in  
21  
22 the 1980s [9, 13]. In 1995, Andersen himself reviewed the model and its development and has  
23  
24 since included feedback loops to consider how treatment outcomes affect health behavior [8].  
25  
26 Additional 'contextual and individual characteristics' were added to the model in the 2000s  
27  
28 [8]. Some of these further developments were carried out in cooperation with other authors,  
29  
30 e.g., Andersen and Newman's Framework of Viewing Health Services Utilization [11] or  
31  
32 Aday and Andersen's Framework for the Study of Access to Medical Care [12]. The BMHSU  
33  
34 was modified for specific settings (e.g., complementary and alternative medicine [14]) and for  
35  
36 specific target groups (e.g., the Behavioral Model for Vulnerable Populations for homeless  
37  
38 people [15]). Currently, many versions of the model for different settings or target groups are  
39  
40 available and applied in health services research. The most current and comprehensive model  
41  
42 is the BMHSU of the year 2013 [16] (Figure 1). The main focus of that model is on the factors  
43  
44 that facilitate or impede an individual's access to health care services. According to the  
45  
46 model, access is determined by contextual characteristics, individual characteristics, health  
47  
48 behaviors, and outcomes. Contextual characteristics include circumstances and the  
49  
50 environment; individual characteristics are determined by a person's life circumstances  
51  
52 including, for example, genetics and socialization; health behaviors are an individual's  
53  
54  
55  
56  
57  
58  
59  
60

1  
2 personal practices; and outcomes are reflected by an individual's health status and consumer  
3  
4 satisfaction.  
5

6  
7 [Figure 1 about here]  
8  
9

10 The application of the BMHSU and its different versions has already been examined in  
11 several systematic reviews. These are, for example, reviews focusing on specific diseases [17]  
12 or settings [18]. The most recent systematic review from Babitsch et al. [3] has examined the  
13 application of the BMHSU in general health care, but excludes specific care settings (e.g.,  
14 maternal health), specific target groups (e.g., veterans), and studies that focus on specific  
15 diseases (e.g., HIV) [3]. These reviews considered quantitative studies only, and excluded  
16 qualitative studies, although qualitative methods have become an important and integral part  
17 of health services research, and are useful for recording detailed descriptions and complex  
18 issues in the context of health care utilization and health care services [4, 5]. Even though the  
19 BMHSU is the most frequently cited model of access to health care services [6], an overview  
20 of the development and application of the BMSHU over the last 50 years is lacking,  
21 especially in terms of its application in qualitative research.  
22  
23  
24  
25  
26  
27  
28  
29  
30  
31  
32  
33  
34  
35  
36  
37

38 Primarily we aimed at a review of qualitative applications of the BMHSU. We learned from  
39 exploratory searches that its application in qualitative research will be difficult to find. That  
40 was when we decided to undertake a meticulous screening of titles and abstracts of  
41 publications dealing with the BMHSU, to provide a descriptive overview on study  
42 characteristics as a first step, to learn about the application of the model in general which  
43 would help to put the qualitative findings into perspective. In a second step, we focus on a  
44 qualitative synthesis of the application of the BMHSU in qualitative health service research.  
45 Here, we synthesize (1) the application of different versions of the BMHSU, (2) the  
46 (un)suitability of the BMHSU from the authors' perspective and (3) which factors of the  
47  
48  
49  
50  
51  
52  
53  
54  
55  
56  
57  
58  
59  
60

1  
2 BMHSU were analyzed in publications with qualitative approach. Further analyses, e.g., the  
3  
4 synthesis of the quantitative studies is object of future publications.  
5

## 6 7 **Methods**

8  
9  
10 This scoping review follows the PRISMA Extension for scoping reviews (PRISMA-ScR) [19]  
11 (additional file 1). It exists no review protocol. For study selection, two researchers (ML, JT)  
12  
13 independently screened all selected titles and abstracts for relevance. For the descriptive  
14  
15 overview, data extraction from title and abstract was divided between two researchers (ML,  
16  
17 JT). One researcher's extraction was verified by the other researcher with extracting data of a  
18  
19 25% random sample and discrepancies were resolved through discussion. For the qualitative  
20  
21 synthesis, the full-texts were independently screened for eligibility and the data were  
22  
23 independently extracted by two researchers (ML, JT). Two researchers (ML, JT) coded the  
24  
25 material together. Through all these processes, discrepancies were discussed and resolved by  
26  
27 a team of reviewers (ML, JT, EMB).  
28  
29  
30  
31  
32

## 33 **Patient and public involvement**

34  
35 No patient involved.  
36  
37

## 38 **Search strategy**

39  
40 We conducted a systematic literature search in March and April 2019, and performed an  
41  
42 updated search in April 2020 using the Embase® via Ovid, Medline® via PubMed,  
43  
44 CINAHL® and PsycInfo® via EBSCOhost, and Social Science Citation Index® via Web of  
45  
46 Science databases.  
47  
48

49  
50 We expanded the search strategy of Babitsch et al. [3] inter alia without limitation on the  
51  
52 target groups, care settings, and diseases of interest. We adjusted the search terms to the  
53  
54 particular databases and combined thesaurus and keywords pertaining to the BMHSU and its  
55  
56 three core factors. The detailed search strategy for one database is identified in the  
57  
58  
59  
60



1  
2 supplementary material (additional file 2). The search was conducted for publications  
3  
4 published from 1968 to April 2020. Figure 2 shows the study selection process according to  
5  
6 the PRISMA statement.  
7

## 8 9 **Descriptive overview**

### 10 11 *Study selection*

12  
13 As an initial first step, title-abstract-screening was performed for all search results. We  
14  
15 included all publications focused on adult populations that applied either the BMHSU, a  
16  
17 modified version of the model, or all three core factors of the model. No limitations were set  
18  
19 for language, study design, or publication type. Studies were excluded if they could not be  
20  
21 obtained via electronic access, interlibrary loan, or through contact with the authors.  
22  
23

### 24 25 *Data extraction*

26  
27 The following inductively formed characteristics were extracted from the title and abstract of  
28  
29 each included study: publication year, first author, region, methodological approach, target  
30  
31 group, care setting, and the applied version of the BMHSU. Beyond labelling included studies  
32  
33 as quantitative, qualitative, or mixed-methods we undertook no attempt to specify details of  
34  
35 the study design, quantify reporting quality or risk of bias. Such a strategy is consistent with  
36  
37 scoping reviews [19]. For abstracts with insufficient information regarding our extraction  
38  
39 characteristics, we obtained the full-text version of the publications.  
40  
41  
42  
43

### 44 45 *Data analysis*

46  
47 We calculated descriptive statistics with MS Excel® for the descriptive overview.  
48  
49

## 50 51 **Qualitative synthesis**

52  
53 Based on the data extraction of the descriptive overview, we obtained the full-texts of all  
54  
55 publications with a qualitative approach, either specifically or as part of a mixed-method  
56  
57 design. Finally, we screened the full-texts of the remaining results and excluded publications  
58  
59 with no relation to the BMHSU in the qualitative part (Figure 2).  
60

### *Quality appraisal*

The quality of the qualitative studies and the qualitative part of studies with a mixed-method design was assessed independently by two researchers (ML, JT) using the “Critical Appraisal Checklist for Qualitative Research” [20]. Authors resolved disagreement by discussion. The checklist contains ten items that assess the methodological quality of the design, data collection, and data analysis of the publications. The tool comprises four answer choices: ‘Yes’, ‘No’, ‘Unclear’, and ‘Not Applicable’. If there was insufficient information to answer a given question, the response was recorded as ‘Unclear’. We included all studies with qualitative and mixed-method approach in the qualitative synthesis regardless of the analyzed quality of the studies.

### *Data analysis*

For the qualitative synthesis, MAXQDA 2020® software was used [21]. To answer the research questions, the following deductive codes were coded in the data material: applied version of the BMHSU, the way in which the model is applied in qualitative studies, the potential for and limitations of the BMHSU, and the extensions of the BMHSU described by the authors. The subcode ‘potential and limitations of the BMHSU’ is based solely on descriptions and conclusions of the authors of the individual publications. In addition, we considered which of the BMHSU factors were examined and which were complemented by inductive factors that emerged from the data material. We distinguished between the three core factors (predisposing factors, enabling factors, and need factors) and the associated factors (e.g., demographics, health policy, and perceived need). We recoded all documents with the final coding frame. In the context of the content-structuring qualitative analysis, the summarizing reduction of the coding followed the approach detailed by other researchers [22]. The presented results are structured based on these main categories.

## Results

### Descriptive overview of the use of the BMHSU in health services research

After removal of duplicates 6,319 records remained of which 1,879 dealt with the BMHSU, with its three core factors, or a modified version of the model (Figure 2).

[Figure 2 about here]

Starting with the initial use of the model in 1973, reception toward the model has increased considerably in recent decades (Table 1). Two-thirds of all identified publications were published in the last ten years (i.e., since 2010), and more than 50% of the publications have been published since 2013. Further, 70% of the publications are from North-America (USA or Canada), followed by Asia (13%) and Europe (9%). The majority are quantitative studies (n=1,680; 89%), while 4% of all records are qualitative studies (n=69) and 3% are reviews (n=61). In all, 30 publications are mixed-method studies (2%) and 39 publications (2%) are theoretical reflections without empirical data. As there are numerous diverse care settings, target groups and diseases of interests, Table 1 presents the three most frequent categories. An overview of the broad range of the characteristics can be found in additional file 3. General health care, as care provided by general practitioners, is the most studied care setting (n=471, n=25%), followed by nursing care (13%, n=237) and mental health services (12%, n=222). About one quarter of all studies deals with individuals aged  $\geq 50$  years (n=481). In addition, 17% of the publications focus on migrants (n=322), and 14% on women (n=256). Half of the publications (n=936) do not account for a specific disease; for 12% (n=229) of all publications, mental disorders represent the most frequently examined diseases of interest.

Table 1: Quantitative description of publications using the Behavioral Model of Health Services Use in health services research

|             | <b>Descriptive overview</b><br><b>(n=1,879)</b><br><i>(based on title &amp; abstract)</i> | <b>Qualitative synthesis</b><br><b>(n=77)</b><br><i>(based on full text version)</i> |
|-------------|-------------------------------------------------------------------------------------------|--------------------------------------------------------------------------------------|
|             | <b>n (%)*</b>                                                                             | <b>n (%)*</b>                                                                        |
| <b>Year</b> |                                                                                           |                                                                                      |
| 1968-1979   | 9 (0)                                                                                     | 0 (0)                                                                                |
| 1980-1989   | 38 (2)                                                                                    | 0 (0)                                                                                |

|                                        |                   |                |
|----------------------------------------|-------------------|----------------|
| 1990-1999                              | <b>168 (9)</b>    | 0 (0)          |
| 2000-2009                              | <b>440 (23)</b>   | <b>7 (9)</b>   |
| 2010-2019                              | <b>1,224 (65)</b> | <b>70 (91)</b> |
| <b>Region</b>                          |                   |                |
| North-America                          | <b>1,275 (70)</b> | <b>43 (56)</b> |
| Asia                                   | <b>244 (13)</b>   | 6 (8)          |
| Europe                                 | <b>163 (9)</b>    | <b>14 (18)</b> |
| Africa                                 | 68 (4)            | <b>12 (16)</b> |
| South America                          | 49 (3)            | 2 (3)          |
| Oceania                                | 29 (2)            | 5 (6)          |
| <b>Methodological approach</b>         |                   |                |
| Quantitative                           | <b>1,680 (89)</b> | /              |
| Qualitative                            | <b>69 (4)</b>     | 58 (75)        |
| Review                                 | <b>61 (3)</b>     | /              |
| Theoretical                            | 39 (2)            | /              |
| Mixed-Method                           | 30 (2)            | 19 (25)        |
| <b>Care Setting<sup>1</sup></b>        |                   |                |
| General health care <sup>2</sup>       | <b>471 (25)</b>   | <b>12 (16)</b> |
| Nursing care <sup>3</sup>              | <b>237 (13)</b>   | 5 (6)          |
| Mental health services                 | <b>222 (12)</b>   | 6 (8)          |
| Screening                              | 107 (6)           | <b>7 (9)</b>   |
| Perinatal care <sup>4</sup>            | 77 (4)            | <b>7 (9)</b>   |
| <b>Target group<sup>1</sup></b>        |                   |                |
| Individuals ≥50 years                  | <b>481 (26)</b>   | <b>11 (14)</b> |
| Migrants                               | <b>322 (17)</b>   | <b>23 (30)</b> |
| Women                                  | <b>256 (14)</b>   | <b>16 (21)</b> |
| <b>Disease of interest<sup>1</sup></b> |                   |                |
| No specific disease                    | <b>936 (50)</b>   | <b>27 (35)</b> |
| Mental disorders                       | <b>229 (12)</b>   | 7 (9)          |
| Cancer                                 | <b>134 (7)</b>    | <b>9 (12)</b>  |
| HIV                                    | 96 (5)            | <b>11 (14)</b> |

<sup>1</sup> Bold: three most frequent categories

<sup>2</sup> General health care: care provided by general practitioners

<sup>3</sup> Nursing: homecare, long-term care, formal care, care facility, informal care, respite care, institutionalized care & transportation services

<sup>4</sup> Perinatal care: including midwifery services

\* The sum might be less than 100% as only the three most frequent categories are represented in this table. Additional file 3 shows all characteristics.

## Qualitative synthesis of the use of the BMHSU in qualitative health services research

After excluding publications without a qualitative or mixed-method approach (n=1,780), those without a full text available (n=10), those without a corresponding full text to a conference paper (n=7), and those that were not at all related to the BMHSU in the qualitative part (n=5), a total of 77 studies remained and were included in the qualitative synthesis of qualitative studies applying the BMHSU (Figure 2).

Although the first known application of the BMHSU in a qualitative study was from 2002, most of the qualitative records were identified in 2010 and later (91%; n=70; Table 1). Most publications are from North-America, USA or Canada (n=43, 56%), 18% (n=14) are from Europe and 16% (n=12) are from Africa. General health care is the care setting that was explored most often in publications adopting a qualitative study design (n=12, 16%), followed

1  
2 by screening and perinatal care (n=7 each, 9%). Qualitative research applying the BMHSU  
3  
4 primarily targets migrants (n=23, 30%), women (n=16, 21%), and individuals aged  $\geq 50$  years  
5  
6 (n=11, 14%). Further, 35% of qualitative publications (n=27) address no specific disease; if a  
7  
8 particular disease was of interest, it is most often HIV (n=11, 14%) or cancer (n=9, 12%).

9  
10  
11 Two-thirds of the qualitative studies use personal interviews as a data collection method  
12  
13 (n=51, 81%). The sample size varies between five and 470 participants. Most of the  
14  
15 qualitative studies interview the target group directly (n=65, 84%). Health professionals  
16  
17 and/or next of kin assessments are the sole source of information in 12 studies (16%). In  
18  
19 addition, 18 of the 65 qualitative studies that approached the target group obtained further  
20  
21 information from health professionals (n=13), next of kin (n=1), or both (n=4; for further  
22  
23 details; additional file 4).

### 24 25 26 27 28 **Application of the different versions of the Andersen model**

29 The BMHSU is applied in the various studies to justify the theoretical background (62%),  
30  
31 structure the data collection (40%), e.g. such as aiding in the development of the interview  
32  
33 guide, and for data coding (78%). More than half of the studies (n=42) [23–62] are based on  
34  
35 the BMHSU from 1995 [9]. Multiple studies (n=11) use the Behavioral Model for Vulnerable  
36  
37 Populations [63–72]. Twelve studies [31, 42, 55, 61, 73–80] employ Andersen and Newman's  
38  
39 Framework of Viewing Health Services Utilization, eight studies [42, 43, 81–86] apply Aday  
40  
41 and Andersen's Framework for the Study of Access to Medical Care, and seven studies [42,  
42  
43 48, 52, 55, 59, 61, 87] are based on the original Behavioral Model of Families' Use of Health  
44  
45 Services from 1968. Individual studies use other models, such as the expanded model from  
46  
47 Bradley et al. [29] (additional file 4).

### 48 49 50 51 52 **(Un)Suitability of the Andersen model from the authors' perspective**

53 Overall, 29 publications [23, 31–33, 35, 36, 40, 42, 43, 45, 46, 48, 49, 51, 53, 55, 56, 69, 72,  
54  
55 73, 78–80, 83, 88–92] described that the model was suitable in their work, e.g., to obtain and  
56  
57 evaluate qualitative data. Of these, 17 publications [35, 36, 40, 43, 45, 46, 49, 51, 53, 73, 78–  
58  
59 60

1  
2 80, 83, 88, 89, 92] highlight the general suitability of the BMSHU for qualitative data:  
3  
4 “Andersen’s framework provides a valid, consistent, and unbiased manner in which to code  
5  
6 and classify qualitative data” [89]. Various publications (n=17) [35, 40, 43, 45, 46, 49, 51, 53,  
7  
8 55, 58, 73, 78–80, 88, 89, 93] described how their data can be applied very well to the  
9  
10 BMHSU and its factors. Others described that the strength of the model lies in its  
11  
12 consideration of both patient-related and environmental factors [40, 51, 91], and that the  
13  
14 model allows for “a more transparent comparison with findings emerging from other studies“  
15  
16 [88].  
17  
18

19  
20  
21 Some studies (n=11) described the suitability of the BMHSU and additionally criticized some  
22  
23 parts of the model [23, 32, 36, 40, 49, 53, 55, 90, 92–94]. For instance, there are authors (n=8)  
24  
25 who criticized the model, but did not propose changes to its structure [23, 26, 36, 49, 90, 92–  
26  
27 94]. Some studies [23, 26] described that cultural factors are not adequately represented in the  
28  
29 model: “the model has been noted not to be sensitive to the diverse cultural and structural  
30  
31 barriers in healthcare among minority groups” [26]. According to the authors of some  
32  
33 publications [36, 49], the models would need to further elaborate upon the relationship  
34  
35 between the three core factors of the BMHSU and the relevance of each. Other authors  
36  
37 claimed that the model does not cover all factors of health care utilization, such as  
38  
39 psychosocial factors [23], and would be less suitable for studies on HIV [90] or health care  
40  
41 coverage [94].  
42  
43  
44  
45

46  
47 Not all critics proposed model modifications, but some of the identified limitations may lead  
48  
49 to modifications of or additions to the BMHSU. Based on their findings, some authors (n=12)  
50  
51 identified additional factors not covered by the model that impact health care utilization [24,  
52  
53 29, 32, 37, 38, 40, 55, 58, 75, 81, 86, 91], such as health literacy [40, 55, 91], or competing  
54  
55 priorities [24, 40] (Table 2). The basic structure of the BMHSU is retained as part of these  
56  
57 expansions.  
58  
59  
60

1  
2 Other studies fundamentally changed the original structure of the BMHSU, both in terms of  
3  
4 the factors [25, 39, 75] and the feedback loops provided [40, 53, 63], ultimately impacting the  
5  
6 influence between each of the factors in the model. Some studies emphasized the distinction  
7  
8 between the three core factors as predisposing and inhibiting factors, and as enabling and  
9  
10 impeding factors [25, 27, 63], while others combined the model with another model [62].  
11  
12  
13  
14  
15  
16  
17  
18  
19  
20  
21  
22  
23  
24  
25  
26  
27  
28  
29  
30  
31  
32  
33  
34  
35  
36  
37  
38  
39  
40  
41  
42  
43  
44  
45  
46  
47  
48  
49  
50  
51  
52  
53  
54  
55  
56  
57  
58  
59  
60

For peer review only

Table 2: Additions to the Behavioral Model of Health Services Use from qualitative health services research

| Contextual characteristics           | Individual characteristics                                                                                               |                                                                                                                           |                 | Health Behaviors                                                                                           | Outcome                                      | Further additions                                  |
|--------------------------------------|--------------------------------------------------------------------------------------------------------------------------|---------------------------------------------------------------------------------------------------------------------------|-----------------|------------------------------------------------------------------------------------------------------------|----------------------------------------------|----------------------------------------------------|
|                                      | Predisposing factors                                                                                                     | Enabling factors                                                                                                          | Need factors    |                                                                                                            |                                              |                                                    |
| Intake & engagement [37]             | Competing priorities [24, 40]                                                                                            | Medication characteristics [40]                                                                                           | Unmet need [32] | Distinction between problem recognition, decision to seek help and decision to use health care system [75] | Dental service use & dental experiences [58] | Psychosocial factors [29]                          |
| Patient & transition [37]            | Fear [24]                                                                                                                | Reminder strategies [40]                                                                                                  |                 |                                                                                                            |                                              |                                                    |
| Medication adherence strategies [37] | (Mis)trust [24, 91]                                                                                                      | Personal emergency alarm system [32]                                                                                      |                 |                                                                                                            |                                              |                                                    |
| Billing [37]                         | Previous experiences [24, 91]                                                                                            | Informal care system [32]                                                                                                 |                 | Avoidant strategies [55]                                                                                   | Intended & actual use [29, 58]               | Situation and satisfaction of the next of kin [81] |
| Specific program for support [37]    | Contingency plans for future falls [32]                                                                                  | Characteristics at the level of informal caregivers [38]: Physician referral, knowledge about the services, acculturation |                 |                                                                                                            |                                              |                                                    |
| Health Literacy [37]                 | Health literacy [40, 55, 91]                                                                                             |                                                                                                                           |                 | Mental health [86]                                                                                         |                                              |                                                    |
| Individualized care [37]             | Characteristics at the level of informal caregivers [38]: Familism, perception about services, religiosity, gender roles |                                                                                                                           |                 |                                                                                                            | Spirituality [55]                            | Service experience [58]                            |
| Philosophical approaches [37]        |                                                                                                                          |                                                                                                                           |                 |                                                                                                            |                                              |                                                    |
| Pharmacy services [40]               |                                                                                                                          |                                                                                                                           |                 |                                                                                                            |                                              |                                                    |
| Rheumatologist [91]                  | Conscientiousness [91]                                                                                                   |                                                                                                                           |                 |                                                                                                            |                                              |                                                    |

The table shows the variables as the authors of the original studies assigned them to BMHSU core factors



## Factors of the BMHSU emerging from qualitative health services research

Individual characteristics are considered much more frequently than contextual characteristics, health behaviors, or health outcomes in publications that adopted a qualitative design. Table 3 lists all factors of the BMHSU with the number of publications that used each factor. Although the qualitative studies explored in our research considered a wide range of factors, there are still some other factors of the BMHSU that have not been considered in any of the included publications that featured a qualitative study design (e.g., quality of life as an outcome factor or some predisposing factors as contextual characteristics).

**Contextual characteristics:** A total of 63 qualitative studies (82%) mentioned contextual characteristics, of which enabling factors are most frequently included, such as health professional factors, e.g. soft skills (n=22, 29%) or availability (n=21, 27%).

**Individual characteristics:** The most frequently researched factors pertain to individual characteristics, especially predisposing factors such as social networks (n=41, 53%), attitude towards health care services (n=33, 43%), and values (n=28, 36%). Nearly half of all studies considered accessibility of health care services as an enabling factor (n=34, 44%). The most common need factor was perceived symptoms (n=45, 58%).

**Health Behavior:** In terms of health behavior, the relationship between the patient and provider (n=21, 27%), as well as alternative medicine (n=13, 17%) and self-care (n=11, 14%) were most often analyzed in publications adopting a qualitative design.

**Outcomes:** Overall, about half of the qualitative studies (n=37) mentioned health outcomes in their analyses. Satisfaction with providers (n=18, 23%) and prior experience (n=17, 22%) were the most considered aspects.

During our qualitative syntheses of qualitative health services research studies, health literacy emerged as a inductive category, separated into individual [95] and organizational health literacy [96]. We identified associations with organizational health literacy in 25 studies

(32%) and individual health literacy in 52 studies (68%; Table 3). In the context of organizational health literacy, the focus was on access to health information: “share health risk information while empowering patients to make their own health decisions” [37]. The most frequently mentioned factors among individual health literacy were knowledge (n=39, 51%) and competences (n=22, 29%), as exemplified by the following statement: “knowledge was empowering to make own choices and feel in control of their care decisions” [28].

Table 3: Factors examined in publications

|                            | Factors                                | N                                                                                                                  | References                                                                                                             |
|----------------------------|----------------------------------------|--------------------------------------------------------------------------------------------------------------------|------------------------------------------------------------------------------------------------------------------------|
| Contextual characteristics | <b>Predisposing factors</b>            |                                                                                                                    |                                                                                                                        |
|                            | Demographic                            | 1                                                                                                                  | [92]                                                                                                                   |
|                            | Social                                 | /                                                                                                                  | /                                                                                                                      |
|                            | Beliefs                                |                                                                                                                    |                                                                                                                        |
|                            | Stigma*                                | 14                                                                                                                 | [34, 45, 46, 53, 61, 65, 67, 72, 78, 85, 86, 89, 90, 97]                                                               |
|                            | Culture*                               | 5                                                                                                                  | [24, 41, 45, 47, 78]                                                                                                   |
|                            | Social norms*                          | 5                                                                                                                  | [35, 41, 77, 78, 88]                                                                                                   |
|                            | Gender roles*                          | 3                                                                                                                  | [28, 67, 97]                                                                                                           |
|                            | <b>Enabling factors</b>                |                                                                                                                    |                                                                                                                        |
|                            | Health Policy                          | 7                                                                                                                  | [43, 58, 62, 84, 85, 92, 98]                                                                                           |
|                            | Financing                              | 12                                                                                                                 | [35, 37, 42, 51, 62, 65, 84, 89, 91, 92, 99, 100]                                                                      |
|                            | Organization                           |                                                                                                                    |                                                                                                                        |
|                            | Health professional factors*           | 22                                                                                                                 | [25, 32, 35, 37, 40, 43, 44, 51, 54, 59, 62, 70, 80, 82, 83, 85, 89, 91–93, 98, 101]                                   |
|                            | Availability*                          | 21                                                                                                                 | [24, 25, 29, 34, 40, 42, 43, 48, 51, 54, 60, 62, 65, 75, 81, 88, 91, 93, 98, 100, 102]                                 |
|                            | Additional health care services*       | 12                                                                                                                 | [27, 37, 53, 73, 76, 77, 81, 82, 89, 91, 98, 101]                                                                      |
|                            | Cultural/linguistic suitable services* | 9                                                                                                                  | [24, 32, 38, 41, 63, 67, 72, 85, 86]                                                                                   |
|                            | Cooperation*                           | 5                                                                                                                  | [24, 78, 81, 82, 98]                                                                                                   |
|                            | System complexity*                     | 6                                                                                                                  | [35, 65, 81, 83, 85, 102]                                                                                              |
|                            | Quality of care*                       | 6                                                                                                                  | [27, 35, 43, 60, 81, 91]                                                                                               |
| Interpreters*              | 2                                      | [24, 70]                                                                                                           |                                                                                                                        |
| <b>Need factors</b>        |                                        |                                                                                                                    |                                                                                                                        |
| Environmental              | 3                                      | [51, 90, 92]                                                                                                       |                                                                                                                        |
| Population health indices  | /                                      | /                                                                                                                  |                                                                                                                        |
| Individual characteristics | <b>Predisposing factors</b>            |                                                                                                                    |                                                                                                                        |
|                            | Demographic                            |                                                                                                                    |                                                                                                                        |
|                            | Immigration status*                    | 7                                                                                                                  | [32, 54, 57, 58, 71, 72, 102]                                                                                          |
|                            | Gender                                 | 2                                                                                                                  | [63, 65]                                                                                                               |
|                            | Age                                    | 13                                                                                                                 | [25, 26, 45, 51, 54, 58, 59, 62, 63, 79, 80, 94, 102]                                                                  |
|                            | Genetic                                | 2                                                                                                                  | [47, 98]                                                                                                               |
|                            | Social                                 |                                                                                                                    |                                                                                                                        |
|                            | Social network                         | 41                                                                                                                 | [26, 27, 29–32, 34, 36, 40–43, 48–51, 55, 57–59, 61, 63, 65, 67, 68, 76, 78–83, 85, 86, 88, 90, 93, 94, 100, 102, 103] |
|                            | Personal skills*                       | 16                                                                                                                 | [27, 30, 40, 44, 46, 52, 66–68, 70–72, 76, 78, 82, 86]                                                                 |
|                            | Competing priorities*                  | 12                                                                                                                 | [23–25, 31, 35, 40, 51, 67, 78, 82, 88, 94]                                                                            |
|                            | Living conditions*                     | 10                                                                                                                 | [40, 42, 48, 50, 66, 67, 71, 81, 89, 90]                                                                               |
|                            | Education*                             | 5                                                                                                                  | [48, 58, 62, 88, 91]                                                                                                   |
|                            | Beliefs                                |                                                                                                                    |                                                                                                                        |
|                            | Attitude towards health care services  | 33                                                                                                                 | [24, 27–30, 32, 35, 41–43, 46, 48–51, 53, 60, 62, 64, 75, 78–81, 86, 88, 89, 91, 93, 99, 100, 102, 103]                |
|                            | Fear*                                  | 27                                                                                                                 | [23–25, 35, 36, 40, 41, 47, 50, 51, 53, 57, 61–63, 65, 68, 71, 75, 77–79, 85, 88, 89, 101, 102]                        |
| Values                     | 28                                     | [24, 26, 27, 30, 32, 34, 35, 41, 47, 49, 54, 55, 57, 58, 61, 63, 67, 68, 71, 72, 75, 82, 85, 87, 88, 93, 100, 103] |                                                                                                                        |
| Attitude towards health    | 12                                     | [28, 33, 38, 44, 46, 48, 49, 61, 77, 88, 99, 102]                                                                  |                                                                                                                        |

|  |                                        |    |                                                                                                                           |
|--|----------------------------------------|----|---------------------------------------------------------------------------------------------------------------------------|
|  | professionals                          |    |                                                                                                                           |
|  | <b>Enabling factors</b>                |    |                                                                                                                           |
|  | Financing                              |    |                                                                                                                           |
|  | Financial resources                    | 25 | [23, 26, 29, 42, 43, 49–54, 58, 63, 66, 68, 71, 72, 78, 79, 88, 91, 94, 99, 100]                                          |
|  | Insurance                              | 18 | [23, 30, 35, 40, 44, 46, 52, 54, 64, 65, 71, 72, 88, 91, 93, 94, 102, 103]                                                |
|  | Income                                 | 8  | [29, 30, 54, 65, 71, 88, 93, 103]                                                                                         |
|  | Organization                           |    |                                                                                                                           |
|  | Accessibility*                         | 34 | [23–26, 30, 35, 40, 42, 43, 45, 48, 49, 51, 53, 58, 62, 65, 66, 72, 75, 78, 79, 82, 83, 88–91, 93, 99–103]                |
|  | Stable routine*                        | 6  | [65, 75, 76, 89, 90, 100]                                                                                                 |
|  | Reminder strategies*                   | 3  | [40, 51, 53]                                                                                                              |
|  | Social Support                         |    |                                                                                                                           |
|  | General*                               | 12 | [48, 49, 51, 64, 67, 76, 78, 80, 83, 88, 90, 100]                                                                         |
|  | Tangible                               | 18 | [27, 32, 34, 40, 42, 50, 51, 65, 67, 76, 79, 81, 87, 91, 93, 94, 102, 103]                                                |
|  | Emotional/affectionate                 | 15 | [23, 25, 26, 30, 36, 50, 51, 55, 63, 65, 67, 76, 78, 81, 83]                                                              |
|  | Informational                          | 11 | [23, 26, 41, 43, 68, 76, 79, 82, 87, 90, 93, 100, 103]                                                                    |
|  | <b>Need factors</b>                    |    |                                                                                                                           |
|  | Perceived                              |    |                                                                                                                           |
|  | General*                               | 10 | [31, 32, 34, 59, 65, 74, 79, 87, 93, 103]                                                                                 |
|  | Symptoms                               | 45 | [23–27, 31, 36, 40, 42–44, 47–51, 54, 55, 58–61, 63, 65, 67, 68, 71, 75, 76, 78, 79, 81, 86, 88, 91, 94, 97, 99–101, 103] |
|  | Evaluated                              | 20 | [26, 31, 34, 36, 42, 56, 59, 60, 63, 76, 79–81, 83, 86, 91–93, 100, 103]                                                  |
|  | <b>Health Behaviors</b>                |    |                                                                                                                           |
|  | Personal health practice               |    |                                                                                                                           |
|  | Alternative medicine*                  | 13 | [26, 30, 45, 54, 55, 58, 65, 78, 79, 87, 88, 91, 99]                                                                      |
|  | Self-care                              | 11 | [25, 30, 47, 49, 65, 75, 87, 88, 90, 99, 100]                                                                             |
|  | Adherence                              | 8  | [37, 40, 51, 64, 66, 91, 100, 102]                                                                                        |
|  | Diet                                   | 4  | [48, 49, 65, 87]                                                                                                          |
|  | Process of medical care                |    |                                                                                                                           |
|  | Relationship patient-provider          | 21 | [24, 27, 28, 40, 51, 53, 61, 67, 68, 71, 73, 75, 76, 78, 83, 85, 89–92, 100]                                              |
|  | Second medical opinion*                | 1  | [51]                                                                                                                      |
|  | Use of personal health services        | 77 | [23–55, 57–68, 70–94, 97–103]                                                                                             |
|  | <b>Outcomes</b>                        |    |                                                                                                                           |
|  | Perceived health status                | 5  | [42, 49, 78, 91, 92]                                                                                                      |
|  | Evaluated health status                | 1  | [65]                                                                                                                      |
|  | Consumer satisfaction                  |    |                                                                                                                           |
|  | General*                               | 2  | [83, 92]                                                                                                                  |
|  | Prior experiences*                     | 17 | [23, 24, 26, 28, 46, 48, 52, 56, 58, 68, 72, 75, 81, 83, 97, 99, 100]                                                     |
|  | Waiting time                           | 5  | [23, 43, 46, 83, 88]                                                                                                      |
|  | Satisfaction with providers*           | 18 | [23, 27, 35, 36, 46, 48, 49, 56, 72, 73, 76, 77, 81, 83, 85, 88, 99, 100]                                                 |
|  | Satisfaction with care facility*       | 8  | [30, 38, 42, 60, 79, 83, 94, 100]                                                                                         |
|  | Quality of life                        | /  | /                                                                                                                         |
|  | <b>Organizational Health Literacy*</b> |    |                                                                                                                           |
|  | Access to Health Information*          | 25 | [23–25, 28, 31, 33, 37, 40, 41, 47–50, 70, 75–77, 84, 85, 91, 93, 94, 100]                                                |
|  | <b>Individual Health literacy*</b>     |    |                                                                                                                           |
|  | Literacy*                              | 2  | [62, 100]                                                                                                                 |
|  | Knowledge*                             | 39 | [24, 27–29, 31–38, 41, 43, 45, 47–53, 55, 58, 63, 68, 70, 74–79, 85, 88, 91, 93, 101, 102]                                |
|  | Motivation*                            | 4  | [35, 76, 78, 99]                                                                                                          |
|  | Competences*                           | 22 | [23, 24, 28, 30, 33, 38, 40, 49, 51, 53, 57, 62, 64, 65, 68, 71, 75, 76, 83, 90, 102, 103]                                |

\*These factors were inductive codes, developed along the data material

### **Quality assessment of publications with a qualitative study design**

Of the 77 qualitative studies, four (5%) reported all ten aspects of the critical appraisal checklist for qualitative research [20]. Most qualitative studies (n=69, 90%) reported between five and nine criteria from the checklist, and four studies (5%) reported fewer than five criteria. The two quality criteria that were most frequently fulfilled with 95% each (n=73) are the “congruity between the stated philosophical perspective and the research methodology” and the “congruity between the research methodology and the methods used to collect data” [20]. In contrast, the “influence of the researcher on the research, and vice-versa” [20] is only addressed in nine publications (12%).

### **Discussion**

This scoping review provides a recent overview of the development and application of the BMHSU in very different care settings, across different diseases, and among publications examining different target groups. The BMHSU is mainly used in quantitative studies, but our review also shows the suitability of the model in qualitative research.

#### **Descriptive overview of the use of the BMHSU in health services research**

The general reception toward the BMHSU has increased considerably in recent years, as has the number of publications adopting this model, with most (70%) of all related publications stemming from North-America. This is in line with another review [3], which excluded specific care settings and diseases. The dominance of research projects adopting quantitative design [104] is reflected in this scoping review, as 89% of the identified publications used quantitative methods.

The BMHSU is mainly used for research examining health care in general, without focusing on specific diseases. This is not surprising, as the recent BMHSU was not developed for any specific care setting or disease [16]. Still, a wide range of publications have focused on specific care settings (e.g., nursing, mental health services) and diseases (e.g., mental disorders). Individuals aged  $\geq 50$  years are the largest target group represented in this

1  
2 overview. Possible explanations for this finding include the fact that this population represents  
3  
4 the largest, and fastest growing cohort in the broader population [105]. Further, this group  
5  
6 uses health care services most frequently [106].  
7  
8

### 9 **Qualitative synthesis on the use of the BMHSU in qualitative health services research**

10 The relevance of the BMHSU for qualitative projects within health services research is  
11  
12 demonstrated by our results. Still, there are some limitations within the BMHSU, which  
13  
14 should be critically considered depending on the research question.  
15  
16

17  
18 The publications featuring a qualitative design mainly consider the individual characteristics  
19  
20 within the BMHSU. Since the primary interest of qualitative research is the subjective  
21  
22 experience of individuals, this result is not surprising [107]. In addition, it was noted that  
23  
24 people from the target group were primarily interviewed in these studies, while there were  
25  
26 fewer next of kin or health professionals interviewed. Experts may wish to consider obtaining  
27  
28 more information about contextual characteristics in their research. Since the data extraction  
29  
30 within the descriptive overview was carried out at the level of titles and abstracts, it is not  
31  
32 possible to determine whether contextual characteristics in publications featuring a  
33  
34 quantitative study design are more strongly represented in this review.  
35  
36  
37

38  
39 Although over half of all publications that adopted a qualitative design had been published  
40  
41 since 2013, most of them considered the Andersen model of 1995, which is also a result of the  
42  
43 review by Babitsch et al. [3]. Only one of the publications with a qualitative design [55]  
44  
45 adopted the most current and comprehensive BMHSU from the year 2013 [16]. This is  
46  
47 interesting, as some authors expanded upon an older version of the BMHSU and justified  
48  
49 various missing factors (e.g., provider negligence and dissatisfaction, location of a clinic),  
50  
51 although these factors are actually included in the most current version of the BMHSU from  
52  
53 2013 [16]. It is important to consider that even R.M. Andersen himself had additional  
54  
55 thoughts on the model [9]. For example, he co-authored a publication [29] with the aim to  
56  
57 expand the view from the original model on psychosocial factors.  
58  
59  
60

1  
2 One new factor that has been discussed in some of the considered studies is health literacy.  
3  
4 Health literacy relates to many parts of the Andersen model and cannot be assigned to a  
5  
6 specific level or factor. We recommend integrating health literacy as an additional factor in  
7  
8 the BMHSU, as an individual's health literacy and health-literate organizations are important  
9  
10 foundations for the (non-)use of health care services, and consequently for health care  
11  
12 research [95, 96].  
13  
14  
15

### 16 **Strengths and limitations**

17 When interpreting the results, it should be noted that although we performed systematic  
18  
19 searches, some publications might have been missed. For example, articles that did not  
20  
21 mention the BMHSU, or the three core factors in the title and abstract were not included.  
22  
23 Further, articles may have been excluded given that we restricted our search to five databases.  
24  
25 However, it became apparent, that all previously known key publications have been identified  
26  
27 through our search strategy [3, 8, 9, 11, 12, 15]. Another limitation is that the extraction of  
28  
29 publication characteristics for descriptive overview was divided between the first authors  
30  
31 (ML, JT) and were not extracted twice. For the qualitative synthesis, the data extraction was  
32  
33 performed on full-texts independently by two researchers. Also, the quality of this scoping  
34  
35 review is based on the quality of the information contained in the included publications. We  
36  
37 considered the general utilization of the BMHSU in health services research (as identified in  
38  
39 the descriptive overview) at the title and abstract level, and not at the full-text level. An  
40  
41 analysis of the full-texts could provide further information about – and more detailed insights  
42  
43 into – the application of the BMHSU. When coding the results based on the various model  
44  
45 factors, one challenge faced by our team was appropriately assigning the factors, as the  
46  
47 assignment of the factors was not always clear. The detailed description of the current  
48  
49 BMHSU by Andersen et al. [16] served us substantially for the assignment of the factors. Any  
50  
51 uncertainties were discussed in the review team. Also, our comparison of the various studies  
52  
53  
54  
55  
56  
57  
58  
59  
60

1  
2 that adopted a qualitative design is limited by the fact that very different versions of the model  
3  
4 were used.  
5

6  
7 Regarding the influence of the reviewers on the review, it should be mentioned that the  
8  
9 review team was composed of individuals with experience in systematic reviews, health  
10  
11 services research and qualitative methods, had no affiliation with the research and no funding  
12  
13 for the review. It should be noted that this scoping review is the first to explore the application  
14  
15 of the widely adopted BMHSU without limiting our search based on target group, care  
16  
17 setting, or disease since the model was initially published in 1968. Further, this review  
18  
19 examined publications adopting qualitative study designs, strengthening the perceptions of  
20  
21 qualitative methods in health care research. This review provides the first-ever overview of  
22  
23 the (un)suitability of the BMHSU in qualitative research.  
24  
25  
26

## 27 28 **Conclusion**

29 This scoping review reveals that the BMHSU, which is one of the main models in health care  
30  
31 services research, has broad applications in very different care settings, across various  
32  
33 diseases, and focuses on a wide range of target groups. The BMHSU is mainly used in  
34  
35 quantitative studies, but our review also shows the suitability of the model for qualitative  
36  
37 research. As health literacy in particular plays an increasingly important role in health care  
38  
39 utilization [95], we think it is important to take this factor into account in the BMHSU. In  
40  
41 further research, it would be interesting to examine this relationship more thoroughly.  
42  
43 Additionally, it might be interesting to compare the application of the BMHSU in quantitative  
44  
45 and qualitative research. The application of so many different (and older) models of health  
46  
47 care utilization makes it difficult to compare the individual studies with one another.  
48  
49 However, such a comparison would be particularly important in the context of health services  
50  
51 research. For future health services research, the current and most comprehensive version of  
52  
53 the BMHSU [16] should always be considered.  
54  
55  
56  
57  
58  
59  
60

### **Author contributions**

ML, JT and EMB conceived the idea of the scoping review. ML, JT built the search strategy, screened the search results, and extracted the data. ML, JT, and EMB interpreted the findings and wrote the manuscript. All authors read and approved the final manuscript.

### **Competing interests**

The authors declare that they have no competing interests.

### **Funding**

This manuscript is supported by the cooperative doctoral study course, “Health Services Research: Collaborative Care” located in Freiburg, Germany. The doctoral study course is, in turn, brought forward by the Ministry of Science, Research and the Arts Baden-Württemberg. The article processing charge was funded by the Baden-Württemberg Ministry of Science, Research and Culture and the University of Education, Freiburg in the funding programme Open Access Publishing.

### **Ethics approval**

This scoping review was based on published data. As researchers did not access any information that could lead to the identification of an individual patient, no concerning ethical issue was raised in this research. Therefore, obtaining ethical approval and consent of participants was waived.

### **Data availability statement**

All data relevant to the study are included in the article or uploaded as supplementary information.

### **Acknowledgements**

We thank Dr. Lisa Lyssenko for her valuable comments on an earlier draft of the manuscript.

Figure 1: Andersen’s Behavioral Model of Health Services Use

Figure 2: Flowdiagram based on PRISMA



## REFERENCES

- 1 Gellman MD, Turner JR, eds. *Encyclopedia of Behavioral Medicine*. New York, NY: Springer 2013.
- 2 Advisory Council on the Assessment of Developments in the Health Care System. *Needs-Based Regulation of the Health Care Provision: Introduction and Summary* 2018.
- 3 Babitsch B, Gohl D, Lengerke Tv. Re-revisiting Andersen's Behavioral Model of Health Services Use: a systematic review of studies from 1998-2001. *GMS Psycho-Social-Medicine* 2012;9:1–15.
- 4 Baumann W, Farin E, Menzel-Begemann A, et al. Memorandum IV: Theoretical and Normative Grounding of Health Services Research. *Gesundheitswesen* 2016;78(5):337–52 (accessed 27 Sep 2019).
- 5 Weiner BJ, Amick HR, Lund JL, et al. Use of qualitative methods in published health services and management research: a 10-year review. *Medical care research and review: MCRR* 2011;68(1):3–33 (accessed 16 Apr 2019).
- 6 Ricketts TC, Goldsmith LJ. Access in health services research: the battle of the frameworks. *Nurs Outlook* 2005;53(6):274–80 (accessed 4 Jul 2019).
- 7 Andersen R. *A behavioral model of families' use of health services*. Chicago, Ill.: Univ. of Chicago 1968.
- 8 Andersen RM. National Health Surveys and the Behavioral Model of Health Services Use. *Med Care* 2008;46(7):647–53.
- 9 Andersen RM. Revisiting the Behavioral Model and Access to Medical Care: Does it Matter? *J Health Soc Behav* 1995;36(1):1–10.
- 10 Lengerke Tv, Gohl D, Babitsch B. Re-visiting the Behavioral Model of Health Care Utilization by Andersen: A Review on Theoretical Advances and Perspectives. In: Janssen C, Swart E, Lengerke Tv, eds. *Health Care Utilization in Germany: Theory, Methodology, and Results*. New York: Springer New York 2014:11–28.

- 1  
2 11 Andersen R, Newman JF. Societal and individual determinants of medical care  
3 utilization in the United States. *Milbank Mem Fund Q Health Soc* 1973;51(1):95–124.  
4  
5  
6 12 Aday LA, Andersen R. A Framework for the Study of Access to Medical Care. *BMC*  
7  
8 *Health Serv Res* 1974:208–20.  
9  
10  
11 13 Gelberg L, Andersen RM, Leake BD. The Behavioral Model for Vulnerable  
12 Populations: application to medical care use and outcomes for homeless people. *Health*  
13 *Services Research* 2000;34(6):1273–302.  
14  
15  
16 14 Fouladbakhsh JM, Stommel M. Using the behavioral model for complementary and  
17 alternative medicine: The CAM healthcare model. *Journal of Complementary and*  
18 *Integrative Medicine* 2007;4(1).  
19  
20  
21 15 Gelberg L, Andersen RM, Leake B. The Behavioral Model for Vulnerable Populations:  
22 Application to Medical Care Use and Outcomes for Homeless People. *Health Services*  
23 *Research* 2000;34(6) (accessed 13 Sep 2018).  
24  
25  
26 16 Andersen RM, Davidson PL, Baumeister SE. Improving Access to Care. In: Kominski  
27 GF, ed. *Changing the U.S. health care system: Key issues in health services policy and*  
28 *management*, 4th edn. San Francisco, California: Jossey-Bass 2013:33–69.  
29  
30  
31 17 Guilcher SJT, Craven BC, McColl MA, et al. Application of the Andersen's health care  
32 utilization framework to secondary complications of spinal cord injury: a scoping  
33 review. *Disabil Rehabil* 2011;34(7):531–41.  
34  
35  
36 18 Chong WF, Ho RM-H. Caregiver needs and formal long-term care service utilization in  
37 the Andersen Model: An individual-participant systematic review and meta-analysis.  
38 *International Journal of Integrated Care* 2018;18.  
39  
40  
41 19 Tricco AC, Lillie E, Zarin W, et al. PRISMA Extension for Scoping Reviews (PRISMA-  
42 ScR): Checklist and Explanation. *Ann Intern Med* 2018;169(7):467–73 (accessed 10  
43 Aug 2020).  
44  
45  
46  
47  
48  
49  
50  
51  
52  
53  
54  
55  
56  
57  
58  
59  
60

- 1  
2 20 Joanna Briggs Institute. Checklist for Qualitative Research 2017. Available at:  
3  
4 [https://joannabriggs.org/sites/default/files/2019-05/JBI\\_Critical\\_Appraisal-](https://joannabriggs.org/sites/default/files/2019-05/JBI_Critical_Appraisal-)  
5  
6 [Checklist\\_for\\_Qualitative\\_Research2017\\_0.pdf](https://joannabriggs.org/sites/default/files/2019-05/JBI_Critical_Appraisal-Checklist_for_Qualitative_Research2017_0.pdf) Accessed August 26, 2019.  
7  
8  
9 21 VERBI GmbH. MAXQDA: The Art of Data Analysis. Available at:  
10  
11 <https://www.maxqda.de/> Accessed January 27, 2020.  
12  
13  
14 22 Kuckartz U. Qualitative text analysis: A guide to methods, practice & using software.  
15  
16 Los Angeles: SAGE 2014.  
17  
18 23 Andrasik MP, Rose R, Pereira D, et al. Barriers to cervical cancer screening among low-  
19  
20 income HIV-positive African American women. *J Health Care Poor Underserved*  
21  
22 2008;19(3):912–25.  
23  
24  
25 24 Artuso S, Cargo M, Brown A, et al. Factors influencing health care utilisation among  
26  
27 Aboriginal cardiac patients in central Australia: a qualitative study. *BMC Health Serv*  
28  
29 *Res* 2013;13:83.  
30  
31  
32 25 Bascur-Castillo C, Araneda-Gatica V, Castro-Arias H, et al. Determinants in the process  
33  
34 of seeking help for urinary incontinence in the Chilean health system. *Int J Gynaecol*  
35  
36 *Obstet* 2019;144(1):103–11.  
37  
38  
39 26 Bayuo J. Experiences with out-patient hospital service utilisation among older persons in  
40  
41 the Asante Akyem North District- Ghana. *BMC Health Serv Res* 2017;17(1):652.  
42  
43  
44 27 Boateng L, Nicolaou M, Dijkshoorn H, et al. An exploration of the enablers and barriers  
45  
46 in access to the Dutch healthcare system among Ghanaians in Amsterdam. *BMC Health*  
47  
48 *Serv Res* 2012;12:75.  
49  
50  
51 28 Bradbury-Jones C, Breckenridge JP, Devaney J, et al. Disabled women's experiences of  
52  
53 accessing and utilising maternity services when they are affected by domestic abuse: a  
54  
55 critical incident technique study. *BMC Pregnancy Childbirth* 2015;15:181.  
56  
57  
58  
59  
60

- 1  
2 29 Bradley EH, McGraw SA, Curry L, et al. Expanding the Andersen model: the role of  
3  
4 psychosocial factors in long-term care use. *Health Services Research* 2002;37(5):1221–  
5  
6 42.  
7  
8  
9 30 Butler C, Kim-Godwin Y, Fox JA. Exploration of health care concerns of Hispanic  
10  
11 women in a rural southeastern North Carolina community. *Online Journal of Rural*  
12  
13 *Nursing and Health Care* 2008;8(2):22–32.  
14  
15  
16 31 Chiu TML. Usage and Non-usage Behaviour of eHealth Services Among Chinese  
17  
18 Canadians Caring for a Family Member with Dementia 2008.  
19  
20  
21 32 Chiu MWY. Psychosocial responses to falling in older Chinese immigrants living in the  
22  
23 community 2011.  
24  
25  
26 33 Conner NE, Chase SK. Decisions and caregiving: End of life among Blacks from the  
27  
28 perspective of informal caregivers and decision makers. *Am J Hosp Palliat Care*  
29  
30 2015;32(4):454–63. [http://www.redi-  
35  
36 bw.de/db/ebSCO.php/search.ebSCOhost.com/login.aspx%3fdirect%3dtrue%26db%3dpsyh  
37  
38 %26AN%3d2015-21262-013%26site%3dehost-live](http://www.redi-<br/>31<br/>32 bw.de/db/ebSCO.php/search.ebSCOhost.com/login.aspx%3fdirect%3dtrue%26db%3dpsyh<br/>33<br/>34 %26AN%3d2015-21262-013%26site%3dehost-live).  
39  
40  
41 34 Corboy D, McDonald J, McLaren S. Barriers to accessing psychosocial support services  
42  
43 among men with cancer living in rural Australia: Perceptions of men and health  
44  
45 professionals. *Int J Mens Health* 2011;10(2):163–83. [http://www.redi-  
50  
51 bw.de/db/ebSCO.php/search.ebSCOhost.com/login.aspx%3fdirect%3dtrue%26db%3dpsyh  
52  
53 %26AN%3d2011-21872-004%26site%3dehost-live](http://www.redi-<br/>46<br/>47 bw.de/db/ebSCO.php/search.ebSCOhost.com/login.aspx%3fdirect%3dtrue%26db%3dpsyh<br/>48<br/>49 %26AN%3d2011-21872-004%26site%3dehost-live).  
54  
55  
56 35 Doshi RK, Malebranche D, Bowleg L, et al. Health care and HIV testing experiences  
57  
58 among Black men in the South: implications for "Seek, Test, Treat, and Retain" HIV  
59  
60 prevention strategies. *AIDS Patient Care STDS* 2013;27(2):123–33.  
61  
62  
63 36 Gill P, Logan K, John B, et al. Participants' experiences of ketamine bladder syndrome:  
64  
65 A qualitative study. *International Journal of Urological Nursing* 2018;12(2/3):76–83.  
66  
67  
68 <http://www.redi->

- 1  
2  
3  
4  
5  
6  
7  
8  
9  
10  
11  
12  
13  
14  
15  
16  
17  
18  
19  
20  
21  
22  
23  
24  
25  
26  
27  
28  
29  
30  
31  
32  
33  
34  
35  
36  
37  
38  
39  
40  
41  
42  
43  
44  
45  
46  
47  
48  
49  
50  
51  
52  
53  
54  
55  
56  
57  
58  
59  
60
- bw.de/db/ebSCO.php/search.ebSCOhost.com/login.aspx%3fdirect%3dtrue%26db%3dcin20  
%26AN%3d132481296%26site%3dehost-live.
- 37 Hawk M, Coulter RWS, Egan JE, et al. Exploring the Healthcare Environment and Associations with Clinical Outcomes of People Living with HIV/AIDS. *AIDS Patient Care STDS* 2017;31(12):495–503.
- 38 Herrera AP, Lee J, Palos G, et al. Cultural influences in the patterns of long-term care use among Mexican American family caregivers. *J Appl Gerontol* 2008;27(2):141–65. <http://www.redi-bw.de/db/ebSCO.php/search.ebSCOhost.com/login.aspx%3fdirect%3dtrue%26db%3dpsych%26AN%3d2008-03902-002%26site%3dehost-live>.
- 39 Herrmann WJ, Haarmann A, Bærheim A. A sequential model for the structure of health care utilization. *PLoS ONE* 2017;12(5):e0176657.
- 40 Holtzman CW, Shea JA, Glanz K, et al. Mapping patient-identified barriers and facilitators to retention in HIV care and antiretroviral therapy adherence to Andersen's Behavioral Model. *AIDS Care* 2015;27(7):817–28.
- 41 Ko LK, Taylor VM, Mohamed FB, et al. "We brought our culture here with us": A qualitative study of perceptions of HPV vaccine and vaccine uptake among East African immigrant mothers. *Papillomavirus Res* 2018;7:21–25.
- 42  
43  
44  
45  
46  
47  
48  
49  
50  
51  
52  
53  
54  
55  
56  
57  
58  
59  
60
- 42 Goh SN. Post Acute Care of the Elderly in Singapore What Factors Influence Use of Services? *Asia Pacific Journal of Social Work and Development* 2011;21(1):31–53. <http://gateway.webofknowledge.com/gateway/Gateway.cgi?GWVersion=2&SrcAuth=SwissAcademicSoftware&SrcApp=Citavi&DestLinkType=FullRecord&DestApp=WOS&KeyUT=000292427400004>.
- 43 Koce F, Randhawa G, Ochieng B. Understanding healthcare self-referral in Nigeria from the service users' perspective: a qualitative study of Niger state. *BMC Health Serv Res* 2019;19(1):209.

- 1  
2 44 Kohno A, Nik Farid ND, Musa G, et al. Factors affecting Japanese retirees' healthcare  
3 service utilisation in Malaysia: a qualitative study. *BMJ Open* 2016;6(3):e010668.  
4  
5  
6 45 Maulik PK, Tewari A, Devarapalli S, et al. The Systematic Medical Appraisal, Referral  
7 and Treatment (SMART) Mental Health Project: Development and Testing of Electronic  
8 Decision Support System and Formative Research to Understand Perceptions about  
9 Mental Health in Rural India. *PLoS ONE* 2016;11(10):e0164404.  
10  
11  
12  
13  
14  
15 46 Mukasa B. Maternal and child health access disparities among recent African  
16 immigrants in the United States 2016.  
17  
18  
19  
20 47 Obikunle AF. Barriers to breast cancer prevention and screening among African  
21 American women 2016.  
22  
23  
24  
25 48 Parkman T, Neale J, Day E, et al. Qualitative exploration of why people repeatedly  
26 attend emergency departments for alcohol-related reasons. *BMC Health Serv Res*  
27 2017;17(1):140.  
28  
29  
30  
31 49 Porteous T, Wyke S, Hannaford P, et al. Self-care behaviour for minor symptoms: can  
32 Andersen's Behavioral Model of Health Services Use help us to understand it? *Int J*  
33 *Pharm Pract* 2015;23(1):27–35.  
34  
35  
36  
37  
38 50 Rööst M, Jonsson C, Liljestränd J, et al. Social differentiation and embodied  
39 dispositions: a qualitative study of maternal care-seeking behaviour for near-miss  
40 morbidity in Bolivia. *Reprod Health* 2009;6:13.  
41  
42  
43  
44  
45 51 Schatz E, Seeley J, Negin J, et al. "For us here, we remind ourselves": strategies and  
46 barriers to ART access and adherence among older Ugandans. *BMC Public Health*  
47 2019;19(1):131.  
48  
49  
50  
51 52 Serna CA. Exploring oral health problems in adult hispanic migrant farmworkers: A  
52 mixed-methods approach 2014.  
53  
54  
55  
56  
57  
58  
59  
60

- 1  
2 53 Tewari A, Kallakuri S, Devarapalli S, et al. Process evaluation of the systematic medical  
3 appraisal, referral and treatment (SMART) mental health project in rural India. *BMC*  
4 *Psychiatry* 2017;17(1):385.  
5  
6  
7  
8  
9 54 White AW. The role of social and cultural factors on preventive health service use  
10 among young, rural, African American men: A narrative inquiry 2017.  
11  
12  
13 55 Isaak C.A., Mota N., Medved M., et al. Conceptualizations of help-seeking for mental  
14 health concerns in First Nations communities in Canada: A comparison of fit with the  
15 Andersen Behavioral Model. *Transcult. Psychiatry* 2020.  
16 <http://tps.sagepub.com/content/by/year>.  
17  
18  
19  
20  
21  
22 56 Lee HY, Lee MH, Jang YJ, et al. Breast Cancer Screening Disparity among Korean  
23 American Immigrant Women in Midwest. *Asian Pac J Cancer Prev* 2017;18(10):2663–  
24 67.  
25  
26  
27  
28  
29 57 Roberson M.C. Refusal of epidural anesthesia for labor pain management by African  
30 American parturients: An examination of factors. *AANA J.* 2019;87(4):299–304.  
31 <https://www.aana.com/publications/aana-journal>.  
32  
33  
34  
35  
36 58 Due C., Aldam I., Ziersch A. Understanding oral health help-seeking among Middle  
37 Eastern refugees and asylum seekers in Australia: An exploratory study. *Community*  
38 *Dent Oral Epidemiol* 2020.  
39  
40  
41  
42  
43 59 Green D.C., Wheeler E.M. A Qualitative Exploration of Facilitators for Health Service  
44 Use among Aging Gay Men Living with HIV. *J. Int. Assoc. Providers AIDS Care*  
45 2019;18. <http://jia.sagepub.com/content/by/year>.  
46  
47  
48  
49  
50 60 Fleury M.-J., Grenier G., Farand L., et al. Reasons for Emergency Department Use  
51 among Patients with Mental Disorders. *Psychiatr Q* 2019;90(4):703–16.  
52 <http://www.wkap.nl/journalhome.htm/0033-2720>.  
53  
54  
55  
56  
57 61 Coleman TM. Help-seeking experiences of African American men with depression  
58 2019.  
59  
60

- 1  
2 62 Opoku D, Busse R, Quentin W. Achieving Sustainability and Scale-Up of Mobile Health  
3  
4 Noncommunicable Disease Interventions in Sub-Saharan Africa: Views of Policy  
5  
6 Makers in Ghana. *JMIR Mhealth Uhealth* 2019;7(5):e11497.  
7  
8  
9 63 Blanas DA, Nichols K, Bekele M, et al. Adapting the Andersen model to a francophone  
10  
11 West African immigrant population: hepatitis B screening and linkage to care in New  
12  
13 York City. *J Community Health* 2015;40(1):175–84.  
14  
15  
16 64 Callahan CC. Cancer, vulnerability, and financial quality of life: A mixed methods study  
17  
18 2012.  
19  
20 65 Cathers LA. Exploring substance use disorders community outpatient counselors'  
21  
22 experiences treating clients with co-occurring medical conditions: An interpretative  
23  
24 phenomenological analysis 2014.  
25  
26  
27 66 Coe AB, Moczygamba LR, Gatewood SBS, et al. Medication adherence challenges  
28  
29 among patients experiencing homelessness in a behavioral health clinic. *Res Social Adm*  
30  
31 *Pharm* 2015;11(3):e110-20.  
32  
33  
34 67 Levison JH, Bogart LM, Khan IF, et al. "Where It Falls Apart": Barriers to Retention in  
35  
36 HIV Care in Latino Immigrants and Migrants. *AIDS Patient Care STDS*  
37  
38 2017;31(9):394–405.  
39  
40  
41 68 Lor B, Ornelas IJ, Magarati M, et al. We Should Know Ourselves: Burmese and  
42  
43 Bhutanese Refugee Women's Perspectives on Cervical Cancer Screening. *J Health Care*  
44  
45 *Poor Underserved* 2018;29(3):881–97.  
46  
47  
48 69 Noh H, Schroepfer TA. Terminally ill African American elders' access to and use of  
49  
50 hospice care. *Am J Hosp Palliat Care* 2015;32(3):286–97.  
51  
52  
53 70 Rice MB. Attitudes of women offenders towards medicaid enrollment and coverage  
54  
55 under the Affordable Care Act 2017.  
56  
57 71 Scott KL. Delay to treatment for Latinos diagnosed with lung and head-and-neck  
58  
59 cancers: Application of the behavioral model for vulnerable populations 2013.  
60



- 1  
2 72 Velez D, Palomo-Zerfas A, Nunez-Alvarez A, et al. Facilitators and Barriers to Dental  
3  
4 Care Among Mexican Migrant Women and Their Families in North San Diego County.  
5  
6 *J Immigr Minor Health* 2017;19(5):1216–26.  
7  
8  
9 73 Dergal J. Family members' use of private companions in nursing homes: A mixed  
10  
11 methods study 2012.  
12  
13 74 Gräbel E, Luttenberger K, Trilling A, et al. Counselling for dementia caregivers-  
14  
15 predictors for utilization and expected quality from a family caregiver's point of view.  
16  
17 *Eur J Ageing* 2010;7(2):111–19.  
18  
19  
20 75 Henson LA, Higginson IJ, Daveson BA, et al. 'I'll be in a safe place': a qualitative study  
21  
22 of the decisions taken by people with advanced cancer to seek emergency department  
23  
24 care. *BMJ Open* 2016;6(11).  
25  
26 [http://gateway.webofknowledge.com/gateway/Gateway.cgi?GWVersion=2&SrcAuth=SwissAcademicSoftware&SrcApp=Citavi&DestLinkType=FullRecord&DestApp=WOS](http://gateway.webofknowledge.com/gateway/Gateway.cgi?GWVersion=2&SrcAuth=SwissAcademicSoftware&SrcApp=Citavi&DestLinkType=FullRecord&DestApp=WOS&KeyUT=000391303400076)  
27  
28 [http://gateway.webofknowledge.com/gateway/Gateway.cgi?GWVersion=2&SrcAuth=SwissAcademicSoftware&SrcApp=Citavi&DestLinkType=FullRecord&DestApp=WOS](http://gateway.webofknowledge.com/gateway/Gateway.cgi?GWVersion=2&SrcAuth=SwissAcademicSoftware&SrcApp=Citavi&DestLinkType=FullRecord&DestApp=WOS&KeyUT=000391303400076)  
29  
30 [http://gateway.webofknowledge.com/gateway/Gateway.cgi?GWVersion=2&SrcAuth=SwissAcademicSoftware&SrcApp=Citavi&DestLinkType=FullRecord&DestApp=WOS](http://gateway.webofknowledge.com/gateway/Gateway.cgi?GWVersion=2&SrcAuth=SwissAcademicSoftware&SrcApp=Citavi&DestLinkType=FullRecord&DestApp=WOS&KeyUT=000391303400076)  
31  
32 [http://gateway.webofknowledge.com/gateway/Gateway.cgi?GWVersion=2&SrcAuth=SwissAcademicSoftware&SrcApp=Citavi&DestLinkType=FullRecord&DestApp=WOS](http://gateway.webofknowledge.com/gateway/Gateway.cgi?GWVersion=2&SrcAuth=SwissAcademicSoftware&SrcApp=Citavi&DestLinkType=FullRecord&DestApp=WOS&KeyUT=000391303400076)  
33  
34 76 Navarro-Millan I, Zinski A, Shurbaji S, et al. Perspectives of Rheumatoid Arthritis  
35  
36 Patients on Electronic Communication and Patient-Reported Outcome Data Collection:  
37  
38 A Qualitative Study. *Arthritis Care and Research* 2019;71(1):80–87.  
39  
40  
41 77 Rachlis B, Naanyu V, Wachira J, et al. Community Perceptions of Community Health  
42  
43 Workers (CHWs) and Their Roles in Management for HIV, Tuberculosis and  
44  
45 Hypertension in Western Kenya. *PLoS ONE* 2016;11(2):e0149412.  
46  
47  
48 78 Rachlis B, Naanyu V, Wachira J, et al. Identifying common barriers and facilitators to  
49  
50 linkage and retention in chronic disease care in western Kenya. *BMC Public Health*  
51  
52 2016;16:741.  
53  
54  
55 79 Riang'a RM, Nangulu AK, Broerse JEW. "I should have started earlier, but I was not  
56  
57 feeling ill!" Perceptions of Kalenjin women on antenatal care and its implications on  
58  
59  
60

- 1  
2 initial access and differentials in patterns of antenatal care utilization in rural Uasin  
3  
4 Gishu County Kenya. *PLoS ONE* 2018;13(10):e0202895.
- 6  
7 80 Victor C, Davies S, Dickinson A, et al. "It just happens". Care home residents'  
8  
9 experiences and expectations of accessing GP care. *Arch Gerontol Geriatr* 2018;79:97–  
10  
11 103.
- 13  
14 81 Condelius A, Andersson M. Exploring access to care among older people in the last  
15  
16 phase of life using the behavioural model of health services use: a qualitative study from  
17  
18 the perspective of the next of kin of older persons who had died in a nursing home. *BMC*  
19  
20 *Geriatr* 2015;15:138.
- 22  
23 82 Han H, Perumalswami P, Kleinman L, et al. Voices of multi-ethnic providers in NYC:  
24  
25 Health care for viral hepatitis. *Hepatology* 2013;Conference 64th Annual Meeting of the  
26  
27 American Association for the Study of Liver Diseases The Liver Meeting 2013.  
28  
29 Washington, DC United States. Conference Publication:1195A-1196A.  
30  
31 <http://ovidsp.ovid.com/ovidweb.cgi?T=JS&CSC=Y&NEWS=N&PAGE=fulltext&D=emed14&AN=71238042>.
- 33  
34  
35  
36 83 Perry R, Gard Read J, Chandler C, et al. Understanding Participants' Perceptions of  
37  
38 Access to and Satisfaction With Chronic Disease Prevention Programs. *Health Educ*  
39  
40 *Behav* 2019:1090198118822710.
- 42  
43 84 Thiessen K, Heaman M, Mignone J, et al. Barriers and facilitators related to  
44  
45 implementation of regulated midwifery in Manitoba: a case study. *BMC Health Serv Res*  
46  
47 2016;16:1–22. [http://www.redi-](http://www.redi-bw.de/db/ebSCO.php/search.ebscohost.com/login.aspx%3fdirect%3dtrue%26db%3dcin20%26AN%3d113906425%26site%3dehost-live)  
48  
49 [bw.de/db/ebSCO.php/search.ebscohost.com/login.aspx%3fdirect%3dtrue%26db%3dcin20](http://www.redi-bw.de/db/ebSCO.php/search.ebscohost.com/login.aspx%3fdirect%3dtrue%26db%3dcin20%26AN%3d113906425%26site%3dehost-live)  
50  
51 [%26AN%3d113906425%26site%3dehost-live](http://www.redi-bw.de/db/ebSCO.php/search.ebscohost.com/login.aspx%3fdirect%3dtrue%26db%3dcin20%26AN%3d113906425%26site%3dehost-live).
- 53  
54  
55 85 Briones-Vozmediano E., Castellanos-Torres E., Goicolea I., et al. Challenges to  
56  
57 Detecting and Addressing Intimate Partner Violence Among Roma Women in Spain:  
58  
59 Perspectives of Primary Care Providers. *J Interpers Violence* 2019:886260519872299.  
60

- 1  
2 86 Chao Y.-Y., Seo J.Y., Katigbak C., et al. Utilization of Mental Health Services Among  
3  
4 Older Chinese Immigrants in New York City. *Community Ment Health J* 2020.  
5  
6  
7 87 Shewamene Z, Dune T, Smith CA. Use of traditional and complementary medicine for  
8  
9 maternal health and wellbeing by African migrant women in Australia: a mixed method  
10  
11 study. *BMC Complement Med Ther* 2020;20(1):60.  
12  
13  
14 88 Majaj L, Nassar M, Allegri M. "It's not easy to acknowledge that I'm ill": a qualitative  
15  
16 investigation into the health seeking behavior of rural Palestinian women. *BMC Womens*  
17  
18 *Health* 2013;13.  
19  
20 <http://gateway.webofknowledge.com/gateway/Gateway.cgi?GWVersion=2&SrcAuth=S>  
21  
22 [wissAcademicSoftware&SrcApp=Citavi&DestLinkType=FullRecord&DestApp=WOS](http://gateway.webofknowledge.com/gateway/Gateway.cgi?GWVersion=2&SrcAuth=S)  
23  
24 [&KeyUT=000320055000001.](http://gateway.webofknowledge.com/gateway/Gateway.cgi?GWVersion=2&SrcAuth=S)  
25  
26  
27 89 Rodriguez HR, Dobalian A. Provider and Administrator Experiences With Providing  
28  
29 HIV Treatment and Prevention Services in Rural Areas. *AIDS Educ Prev*  
30  
31 2017;29(1):77–91.  
32  
33  
34 90 Nowgesic EF. Antiretroviral Therapy Access, Acceptance and Adherence among Urban  
35  
36 Indigenous Peoples Living with HIV in Saskatchewan: The Indigenous Red Ribbon  
37  
38 Storytelling Study 2015.  
39  
40  
41 91 Heidari P., Cross W., Weller C., et al. Rheumatologists' insight into medication  
42  
43 adherence in patients with rheumatoid arthritis: A qualitative study. *Int. J. Rheum. Dis.*  
44  
45 2019;22(9):1695–705. [http://onlinelibrary.wiley.com/journal/10.1111/\(ISSN\)1756-](http://onlinelibrary.wiley.com/journal/10.1111/(ISSN)1756-)  
46  
47 [185X.](http://onlinelibrary.wiley.com/journal/10.1111/(ISSN)1756-)  
48  
49  
50 92 Robinson P.G., Douglas G.V.A., Gibson B.J., et al. Remuneration of primary dental care  
51  
52 in England: A qualitative framework analysis of perspectives of a new service delivery  
53  
54 model incorporating incentives for improved access, quality and health outcomes. *BMJ*  
55  
56 *Open* 2019;9(10):e031886. [http://bmjopen.bmj.com/content/early/by/section.](http://bmjopen.bmj.com/content/early/by/section)  
57  
58  
59  
60

- 1  
2 93 Travers J.L., Hirschman K.B., Naylor M.D. Adapting Andersen's expanded behavioral  
3  
4 model of health services use to include older adults receiving long-term services and  
5  
6 supports. *BMC Geriatr* 2020;20(1):58.  
7  
8  
9 94 Grodensky CA, Rosen DL, Blue CM, et al. Medicaid Enrollment among Prison Inmates  
10  
11 in a Non-expansion State: Exploring Predisposing, Enabling, and Need Factors Related  
12  
13 to Enrollment Pre-incarceration and Post-Release. *Journal of urban health: bulletin of*  
14  
15 *the New York Academy of Medicine* 2018;95(4):454–66.  
16  
17  
18 95 Sørensen K, van den Broucke S, Fullam J, et al. Health literacy and public health: a  
19  
20 systematic review and integration of definitions and models. *BMC Public Health*  
21  
22 2012;12:80 (accessed 20 Dec 2019).  
23  
24  
25 96 Brach C, Keller D, Hernandez Lyla M, et al. Ten Attributes of Health Literate Health  
26  
27 Care Organizations 2012. Available at: [https://nam.edu/wp-](https://nam.edu/wp-content/uploads/2015/06/BPH_Ten_HLit_Attributes.pdf)  
28  
29 content/uploads/2015/06/BPH\_Ten\_HLit\_Attributes.pdf. Accessed January 07, 2020.  
30  
31  
32 97 Go VF-I, Quan VM, Chung A, et al. Gender gaps, gender traps: sexual identity and  
33  
34 vulnerability to sexually transmitted diseases among women in Vietnam. *Soc Sci Med*  
35  
36 2002;55(3):467–81.  
37  
38  
39 98 Sperber NR, Andrews SM, Voils CI, et al. Barriers and Facilitators to Adoption of  
40  
41 Genomic Services for Colorectal Care within the Veterans Health Administration. *J Pers*  
42  
43 *Med* 2016;6(2).  
44  
45  
46 99 Mago A, MacEntee MI, Brondani M, et al. Anxiety and anger of homeless people  
47  
48 coping with dental care. *Community Dent Oral Epidemiol* 2018;46(3):225–30.  
49  
50  
51 100 Richards C. Women's experiences with the follow-up system for cervical cancer in a  
52  
53 developing country. 76 2015.  
54  
55  
56 101 Bradbury-Jones C, Breckenridge JP, Devaney J, et al. Priorities and strategies for  
57  
58 improving disabled women's access to maternity services when they are affected by  
59  
60

- 1  
2 domestic abuse: a multi-method study using concept maps. *BMC Pregnancy Childbirth*  
3  
4 2015;15:350.  
5  
6 102 Lee MH. Breast cancer screening behavior in Korean immigrant women in the United  
7  
8 States 2017.  
9  
10 103 Noh H. Terminally ill Black elders: Making the choice to receive hospice care 2013.  
11  
12 104 Chafe R. The Value of Qualitative Description in Health Services and Policy Research.  
13  
14 *Healthcare Policy* 2017;22(3):12–18 (accessed 4 Mar 2020).  
15  
16 105 Ritchie H, Roser M. Age Structure 2019. Available at: [https://ourworldindata.org/age-](https://ourworldindata.org/age-structure#)  
17  
18 [structure#](https://ourworldindata.org/age-structure#) Accessed March 02, 2020.  
19  
20 106 Institute of Medicine. Retooling for an aging America: Building the health care  
21  
22 workforce. Washington D.C.: National Academies Press 2008.  
23  
24 107 Flick U, Kardorff Ev, Steinke I. What is Qualitative Research? And Introduction to the  
25  
26 Field. In: Flick U, Kardorff Ev, Steinke I, eds. A companion to qualitative research.  
27  
28 London: SAGE 2010:1–12.  
29  
30  
31  
32  
33  
34  
35  
36  
37  
38  
39  
40  
41  
42  
43  
44  
45  
46  
47  
48  
49  
50  
51  
52  
53  
54  
55  
56  
57  
58  
59  
60

1  
2  
3  
4  
5  
6  
7  
8  
9  
10  
11  
12  
13  
14  
15  
16  
17  
18  
19  
20  
21  
22  
23  
24  
25  
26  
27  
28  
29  
30  
31  
32  
33  
34  
35  
36  
37  
38  
39  
40  
41

Contextual characteristics

Individual characteristics

Health Behaviors

Outcomes



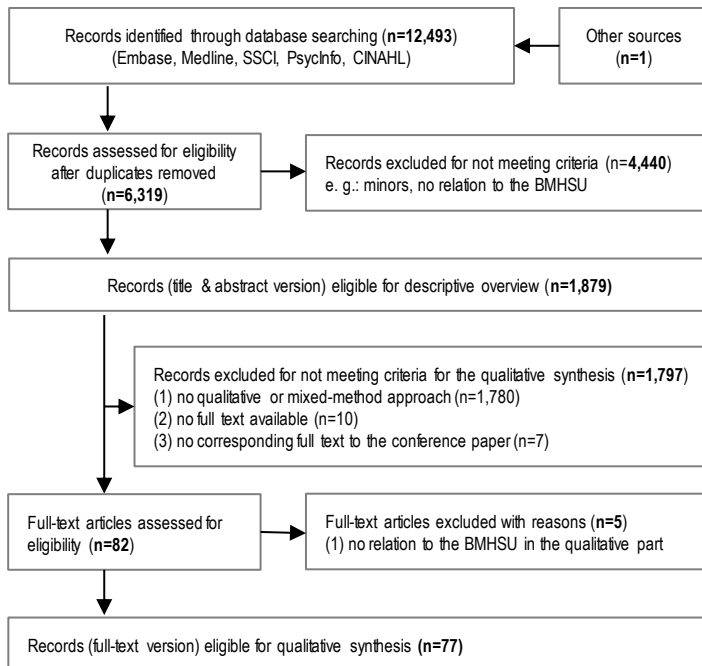

## Preferred Reporting Items for Systematic reviews and Meta-Analyses extension for Scoping Reviews (PRISMA-ScR) Checklist

| SECTION                                               | ITEM | PRISMA-ScR CHECKLIST ITEM                                                                                                                                                                                                                                                                                  | REPORTED ON PAGE # |
|-------------------------------------------------------|------|------------------------------------------------------------------------------------------------------------------------------------------------------------------------------------------------------------------------------------------------------------------------------------------------------------|--------------------|
| <b>TITLE</b>                                          |      |                                                                                                                                                                                                                                                                                                            |                    |
| Title                                                 | 1    | Identify the report as a scoping review.                                                                                                                                                                                                                                                                   | 1                  |
| <b>ABSTRACT</b>                                       |      |                                                                                                                                                                                                                                                                                                            |                    |
| Structured summary                                    | 2    | Provide a structured summary that includes (as applicable): background, objectives, eligibility criteria, sources of evidence, charting methods, results, and conclusions that relate to the review questions and objectives.                                                                              | 2                  |
| <b>INTRODUCTION</b>                                   |      |                                                                                                                                                                                                                                                                                                            |                    |
| Rationale                                             | 3    | Describe the rationale for the review in the context of what is already known. Explain why the review questions/objectives lend themselves to a scoping review approach.                                                                                                                                   | 3-5                |
| Objectives                                            | 4    | Provide an explicit statement of the questions and objectives being addressed with reference to their key elements (e.g., population or participants, concepts, and context) or other relevant key elements used to conceptualize the review questions and/or objectives.                                  | 5                  |
| <b>METHODS</b>                                        |      |                                                                                                                                                                                                                                                                                                            |                    |
| Protocol and registration                             | 5    | Indicate whether a review protocol exists; state if and where it can be accessed (e.g., a Web address); and if available, provide registration information, including the registration number.                                                                                                             | 6                  |
| Eligibility criteria                                  | 6    | Specify characteristics of the sources of evidence used as eligibility criteria (e.g., years considered, language, and publication status), and provide a rationale.                                                                                                                                       | 7                  |
| Information sources*                                  | 7    | Describe all information sources in the search (e.g., databases with dates of coverage and contact with authors to identify additional sources), as well as the date the most recent search was executed.                                                                                                  | 6                  |
| Search                                                | 8    | Present the full electronic search strategy for at least 1 database, including any limits used, such that it could be repeated.                                                                                                                                                                            | Additional file 2  |
| Selection of sources of evidence†                     | 9    | State the process for selecting sources of evidence (i.e., screening and eligibility) included in the scoping review.                                                                                                                                                                                      | 6,7                |
| Data charting process‡                                | 10   | Describe the methods of charting data from the included sources of evidence (e.g., calibrated forms or forms that have been tested by the team before their use, and whether data charting was done independently or in duplicate) and any processes for obtaining and confirming data from investigators. | 7,8                |
| Data items                                            | 11   | List and define all variables for which data were sought and any assumptions and simplifications made.                                                                                                                                                                                                     | 6,7                |
| Critical appraisal of individual sources of evidence§ | 12   | If done, provide a rationale for conducting a critical appraisal of included sources of evidence; describe the methods used and how this information was used in any data synthesis (if appropriate).                                                                                                      | 7                  |

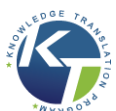



| SECTION                                       | ITEM | PRISMA-ScR CHECKLIST ITEM                                                                                                                                                                       | REPORTED ON PAGE # |
|-----------------------------------------------|------|-------------------------------------------------------------------------------------------------------------------------------------------------------------------------------------------------|--------------------|
| Synthesis of results                          | 13   | Describe the methods of handling and summarizing the data that were charted.                                                                                                                    | 8                  |
| <b>RESULTS</b>                                |      |                                                                                                                                                                                                 |                    |
| Selection of sources of evidence              | 14   | Give numbers of sources of evidence screened, assessed for eligibility, and included in the review, with reasons for exclusions at each stage, ideally using a flow diagram.                    | 8,9 and figure 2   |
| Characteristics of sources of evidence        | 15   | For each source of evidence, present characteristics for which data were charted and provide the citations.                                                                                     | 9                  |
| Critical appraisal within sources of evidence | 16   | If done, present data on critical appraisal of included sources of evidence (see item 12).                                                                                                      | 17                 |
| Results of individual sources of evidence     | 17   | For each included source of evidence, present the relevant data that were charted that relate to the review questions and objectives.                                                           | 13; 15-16          |
| Synthesis of results                          | 18   | Summarize and/or present the charting results as they relate to the review questions and objectives.                                                                                            | 8-17               |
| <b>DISCUSSION</b>                             |      |                                                                                                                                                                                                 |                    |
| Summary of evidence                           | 19   | Summarize the main results (including an overview of concepts, themes, and types of evidence available), link to the review questions and objectives, and consider the relevance to key groups. | 17                 |
| Limitations                                   | 20   | Discuss the limitations of the scoping review process.                                                                                                                                          | 19                 |
| Conclusions                                   | 21   | Provide a general interpretation of the results with respect to the review questions and objectives, as well as potential implications and/or next steps.                                       | 19, 20             |
| <b>FUNDING</b>                                |      |                                                                                                                                                                                                 |                    |
| Funding                                       | 22   | Describe sources of funding for the included sources of evidence, as well as sources of funding for the scoping review. Describe the role of the funders of the scoping review.                 | 20                 |

JBI = Joanna Briggs Institute; PRISMA-ScR = Preferred Reporting Items for Systematic reviews and Meta-Analyses extension for Scoping Reviews.

\* Where *sources of evidence* (see second footnote) are compiled from, such as bibliographic databases, social media platforms, and Web sites.

† A more inclusive/heterogeneous term used to account for the different types of evidence or data sources (e.g., quantitative and/or qualitative research, expert opinion, and policy documents) that may be eligible in a scoping review as opposed to only studies. This is not to be confused with *information sources* (see first footnote).

‡ The frameworks by Arksey and O'Malley (6) and Levac and colleagues (7) and the JBI guidance (4, 5) refer to the process of data extraction in a scoping review as data charting.

§ The process of systematically examining research evidence to assess its validity, results, and relevance before using it to inform a decision. This term is used for items 12 and 19 instead of "risk of bias" (which is more applicable to systematic reviews of interventions) to include and acknowledge the various sources of evidence that may be used in a scoping review (e.g., quantitative and/or qualitative research, expert opinion, and policy document).

From: Tricco AC, Lillie E, Zarin W, O'Brien KK, Colquhoun H, Levac D, et al. PRISMA Extension for Scoping Reviews (PRISMA-ScR): Checklist and Explanation. *Ann Intern Med.* 2018;169:467–473. doi: [10.7326/M18-0850](https://doi.org/10.7326/M18-0850).

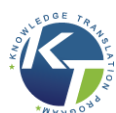

## Additional file 2: Exemplary search strategy

| <b>Exemplary search strategy – Medline via Pubmed</b> |                                                                        |
|-------------------------------------------------------|------------------------------------------------------------------------|
| #1                                                    | "Andersen RM" [Author]                                                 |
| #2                                                    | "Andersen R" [Author]                                                  |
| #3                                                    | #1 OR #2                                                               |
| #4                                                    | "Andersen model"                                                       |
| #5                                                    | "Andersen's model"                                                     |
| #6                                                    | #4 OR #5                                                               |
| #7                                                    | "Behavioral Model of Health Services Use"                              |
| #8                                                    | "Behavioural Model of Health Services Use"                             |
| #9                                                    | #7 OR #8                                                               |
| #10                                                   | andersen*                                                              |
| #11                                                   | "behavior model"                                                       |
| #12                                                   | "behaviour model"                                                      |
| #13                                                   | "behavioral model"                                                     |
| #14                                                   | "behavioural model"                                                    |
| #15                                                   | (#11 OR #12 OR #13 OR #14) AND #10                                     |
| #16                                                   | "health model"                                                         |
| #17                                                   | #16 AND #10                                                            |
| #18                                                   | utilization                                                            |
| #19                                                   | utilisation                                                            |
| #20                                                   | "Facilities and Services Utilization"[Mesh]                            |
| #21                                                   | "Patient Acceptance of Health Care"[Mesh]                              |
| #22                                                   | model                                                                  |
| #23                                                   | (#18 OR #19 OR #20 OR #21) AND #22 AND #10                             |
| #24                                                   | aday*                                                                  |
| #25                                                   | davidson*                                                              |
| #26                                                   | newman*                                                                |
| #27                                                   | gelberg*                                                               |
| #28                                                   | (#22 OR #23 OR #24 OR #25) AND #10                                     |
| #29                                                   | predisposing                                                           |
| #30                                                   | enabling                                                               |
| #31                                                   | need                                                                   |
| #32                                                   | #27 AND #28 AND #29                                                    |
| #33                                                   | (#27 OR #28 OR #29) AND #10                                            |
| #34                                                   | "andersen framework"                                                   |
| #35                                                   | "Behavioral Model for Vulnerable Populations"                          |
| #36                                                   | #3 OR #6 OR #9 OR #15 OR #17 OR #23 OR #28 OR #32 OR #33 OR #34 OR #35 |
| #37                                                   | animals                                                                |
| #38                                                   | #36 NOT #37                                                            |
| #39                                                   | #36 NOT #37 Filters: Publication date from 1968/01/01 to 2019/04/09    |

## Additional file 3: All characteristics and categories

| Diseases of interest          | Total n=1,879  |    |
|-------------------------------|----------------|----|
|                               | n <sup>1</sup> | %  |
| no specific disease           | 936            | 50 |
| mental disorder               | 229            | 12 |
| cancer                        | 134            | 7  |
| HIV                           | 96             | 5  |
| addiction                     | 82             | 4  |
| diabetes                      | 43             | 2  |
| cardiovascular disease        | 42             | 2  |
| dementia                      | 39             | 2  |
| oral diseases                 | 28             | 1  |
| chronic disease in general    | 25             | 1  |
| arthritis                     | 20             | 1  |
| maternal and perinatal health | 17             | 1  |
| disability                    | 16             | 1  |
| violence experience           | 13             | 1  |
| alzheimer's disease           | 12             | 1  |
| asthma                        | 11             | 1  |
| brain injury                  | 10             | 1  |
| flu                           | 7              | 0  |
| stroke                        | 7              | 0  |
| urologic diseases             | 7              | 0  |
| multiple sclerosis            | 7              | 0  |
| pulmonary disease             | 7              | 0  |
| osteoporosis                  | 6              | 0  |
| hepatitis B or C              | 5              | 0  |
| influenza                     | 5              | 0  |
| tuberculosis                  | 5              | 0  |
| parkinson's disease           | 5              | 0  |
| trauma                        | 4              | 0  |
| epilepsy                      | 4              | 0  |
| gastrointestinal diseases     | 4              | 0  |
| back pain                     | 4              | 0  |
| eye problems                  | 4              | 0  |
| autism spectrum disorder      | 3              | 0  |
| chronic pain                  | 3              | 0  |
| hearing loss                  | 3              | 0  |
| HPV                           | 3              | 0  |
| spinal cord injury            | 3              | 0  |
| hip or knee arthroplasty      | 3              | 0  |
| suicidal ideation or suicide  | 3              | 0  |
| others                        | 44             | 2  |

Legend:

<sup>1</sup> Since some publications included multiple care settings, target groups etc. the sum might be greater than 100%

## Additional file 3: All characteristics and categories

|                                            | Total n=1,879  |    |
|--------------------------------------------|----------------|----|
| Target groups                              | n <sup>1</sup> | %  |
| elderly individuals                        | 481            | 26 |
| migrants                                   | 322            | 17 |
| females                                    | 256            | 14 |
| general population                         | 255            | 14 |
| men                                        | 203            | 11 |
| individuals with mental disorder           | 127            | 7  |
| community-dwelling individuals             | 74             | 4  |
| caregivers                                 | 71             | 4  |
| individuals with low socio-economic status | 69             | 4  |
| individuals living in rural areas          | 68             | 4  |
| individuals with HIV                       | 65             | 3  |
| young individuals                          | 56             | 3  |
| soldiers or veterans                       | 56             | 3  |
| individuals with cancer                    | 50             | 3  |
| insured individuals                        | 39             | 2  |
| mothers                                    | 36             | 2  |
| individuals with diabetes                  | 33             | 2  |
| individuals living in urban areas          | 31             | 2  |
| individuals with cardiovascular disease    | 29             | 2  |
| individuals with disabilities              | 25             | 1  |
| patients                                   | 21             | 1  |
| individuals with dementia                  | 20             | 1  |
| LSBTIQ*                                    | 20             | 1  |
| people of color                            | 18             | 1  |
| individuals with arthritis                 | 17             | 1  |
| individuals with chronic disease           | 17             | 1  |
| employed individuals                       | 15             | 1  |
| vulnerable individuals                     | 15             | 1  |
| individuals with incarceration experience  | 13             | 1  |
| students                                   | 13             | 1  |
| health care providers                      | 12             | 1  |
| individuals with asthma                    | 11             | 1  |
| inpatients                                 | 11             | 1  |
| nursing home residents                     | 10             | 1  |
| individuals with brain injury              | 10             | 1  |
| care-dependent individuals                 | 10             | 1  |
| victims of violence                        | 9              | 0  |
| no specific population                     | 8              | 0  |
| uninsured individuals                      | 8              | 0  |
| individuals with cognitive impairment      | 7              | 0  |
| ethnic minorities                          | 7              | 0  |
| high-risk individuals                      | 5              | 0  |
| individuals at the end of life             | 5              | 0  |
| individuals in the emergency department    | 5              | 0  |
| individuals with stroke                    | 5              | 0  |
| married individuals                        | 5              | 0  |
| individuals with chronic pain              | 5              | 0  |

## Additional file 3: All characteristics and categories

| Target groups                               | Total n=1,879  |   |
|---------------------------------------------|----------------|---|
|                                             | n <sup>1</sup> | % |
| individuals with parkinson's disease        | 5              | 0 |
| individuals with multiple sclerosis         | 5              | 0 |
| complementary medicine clients              | 4              | 0 |
| discharged individuals                      | 4              | 0 |
| frail individuals                           | 4              | 0 |
| individuals with epilepsy                   | 4              | 0 |
| individuals with oral diseases              | 4              | 0 |
| outpatients                                 | 4              | 0 |
| primary care patients                       | 4              | 0 |
| parents                                     | 4              | 0 |
| individuals with experienced trauma         | 4              | 0 |
| border residents                            | 3              | 0 |
| individuals with alzheimer's disease        | 3              | 0 |
| individuals with back pain                  | 3              | 0 |
| individuals with hearing loss               | 3              | 0 |
| individuals with osteoporosis               | 3              | 0 |
| individuals with pulmonary disease          | 3              | 0 |
| individuals with spinal cord injury         | 3              | 0 |
| individuals with tuberculosis               | 3              | 0 |
| individuals with a hip or knee arthroplasty | 3              | 0 |
| individuals with obesity                    | 3              | 0 |
| sex workers                                 | 3              | 0 |
| addictive individuals                       | 3              | 0 |
| others                                      | 50             | 3 |

Legend:

<sup>1</sup> Since some publications included multiple care settings, target groups etc. the sum might be greater than 100%.

## Additional file 3: All characteristics and categories

1  
2  
3  
4  
5  
6  
7  
8  
9  
10  
11  
12  
13  
14  
15  
16  
17  
18  
19  
20  
21  
22  
23  
24  
25  
26  
27  
28  
29  
30  
31  
32  
33  
34  
35  
36  
37  
38  
39  
40  
41  
42  
43  
44  
45  
46  
47  
48  
49  
50  
51  
52  
53  
54  
55  
56  
57  
58  
59  
60

| Care settings                          | Total n=1,879  |    |
|----------------------------------------|----------------|----|
|                                        | n <sup>1</sup> | %  |
| general health care                    | 471            | 25 |
| nursing                                | 237            | 13 |
| mental health services                 | 222            | 12 |
| medication use                         | 115            | 6  |
| Screening                              | 107            | 6  |
| oral health services                   | 104            | 6  |
| inpatient care                         | 99             | 5  |
| natal care                             | 77             | 4  |
| emergency care                         | 73             | 4  |
| addiction services                     | 56             | 3  |
| health expenditure                     | 44             | 2  |
| social services                        | 43             | 2  |
| community-based services               | 43             | 2  |
| preventive services                    | 43             | 2  |
| complementary and alternative medicine | 41             | 2  |
| outpatient care                        | 41             | 2  |
| HIV treatment services                 | 35             | 2  |
| cancer care                            | 27             | 1  |
| end-of-life care                       | 24             | 1  |
| e-health                               | 20             | 1  |
| vaccination                            | 19             | 1  |
| rehabilitation services                | 17             | 1  |
| patient satisfaction                   | 16             | 1  |
| health-related quality of life         | 14             | 1  |
| health insurance                       | 13             | 1  |
| health literacy                        | 12             | 1  |
| veterans health administration         | 9              | 0  |
| eye care                               | 8              | 0  |
| physical therapy                       | 8              | 0  |
| health behavior                        | 7              | 0  |
| self care                              | 6              | 0  |
| health information                     | 5              | 0  |
| chronic pain treatment                 | 5              | 0  |
| chronic care in general                | 4              | 0  |
| hyperlipidemia treatment               | 4              | 0  |
| health situation                       | 4              | 0  |
| case management                        | 3              | 0  |
| osteoporosis treatment                 | 3              | 0  |
| services for caregivers                | 3              | 0  |
| medical assistive devices              | 3              | 0  |
| physician trust                        | 3              | 0  |
| diabetes treatment                     | 3              | 0  |
| others                                 | 36             | 2  |

Legend:

<sup>1</sup> Since some publications included multiple care settings, target groups etc. the sum might be greater than 100%.

Additional file 4: Characteristics of publications with qualitative study design

| Author & year of publication       | Country   | Method |    | Care Setting                           | Target group of interest                        | Disease of interest           | Document type | Survey | Respondents | N   | Application of the Andersen model       |              |
|------------------------------------|-----------|--------|----|----------------------------------------|-------------------------------------------------|-------------------------------|---------------|--------|-------------|-----|-----------------------------------------|--------------|
| Chao et al. 2020 [1]               | USA       | mm     | CA | Mental health services                 | Migrants; elderly individuals                   | Mental disorder               | A             | I      | TG          | 14  | A&A1974                                 | DC; DA       |
| Due et al. 2020 [2]                | Australia | ql     | CA | Oral health services                   | Migrants                                        | No specific disease           | A             | I      | TG, HP      | 26  | R-BMHSU1995                             | Theo; DC; DA |
| Isaak et al. 2020 [3]              | Canada    | ql     | GT | Mental health services                 | Racial and ethnic minorities                    | Mental disorder               | A             | I, FG  | TG          | 115 | BMHSU, R-BMHSU1995, A&N1973, A&D&B 2013 | Theo; DA     |
| Shewamene et al. 2020 [4]          | Australia | mm     | CA | Complementary and alternative medicine | Women; migrants                                 | Maternal and perinatal health | A             | I      | TG          | 15  | BMHSU                                   | Theo         |
| Travers et al. 2020 [5]            | USA       | ql     | CA | Long-term care                         | Elderly individuals                             | No specific disease           | A             | I      | TG          | 470 | Ex-BMPF2002                             | Theo; DA     |
| Bascur-Castillo et al. 2019 [6]    | Chile     | ql     | P  | Urologic disease treatment             | Women                                           | Urologic diseases             | A             | I      | TG          | 10  | R-BMHSU1995                             | Theo; DA     |
| Briones-Vozmediano et al. 2019 [7] | Spain     | ql     | CA | General health care                    | Migrants                                        | Violence experience           | A             | I      | HP          | 28  | A&A1974                                 | DA           |
| Coleman 2019 [8]                   | USA       | ql     | P  | Mental health services                 | Migrants; men; individuals with mental disorder | Mental disorder               | D             | I      | TG          | 66  | BMHSU, R-BMHSU1995, A&N1973             | Theo         |
| Fleury et al. 2019 [9]             | Canada    | mm     | -  | Mental health services                 | Individuals with mental disorder                | Mental disorder               | A             | I      | TG          | 328 | R-BMHSU1995                             | Theo; DC; DA |
| Green et al. 2019 [10]             | USA       | ql     | CA | General health care                    | Men; individuals with HIV                       | HIV                           | A             | I      | TG          | 10  | BMHSU, R-BMHSU1995                      | DA           |
| Heidari et al. [11]                | Iran      | ql     | CA | Medication use                         | Individuals with arthritis                      | Arthritis                     | A             | I      | HP          | 47  | BMHSU2008                               | DC; DA       |
| Koche et al. 2019 [12]             | Nigeria   | ql     | -  | General health care                    | General population                              | No specific disease           | A             | I      | TG          | 24  | R-BMHSU1995, A&A1974, A&D2001, A&N2005  | DA           |
| Navarro-Millan et al. 2019 [13]    | UK        | ql     | -  | E-health                               | Individuals with specific disease               | Rheumatoid arthritis          | A             | FG     | TG          | 31  | A&N1973                                 | DC; DA       |
| Opoku et al. 2019 [14]             | Ghana     | ql     | CA | E-health                               | Individuals with non-communicable disease       | Non-communicable disease      | A             | I      | HP          | 13  | mhealth PNE                             | DA           |
| Perry et al. 2019 [15]             | USA       | ql     | TA | Preventive services                    | Individuals with low socio-economic status      | No specific disease           | A             | FG     | TG          | 235 | A&A1974                                 | Theo; DC; DA |
| Roberson et al. 2019 [16]          | USA       | ql     | GT | Natal care                             | Women; migrants, pregnant women                 | Maternal and perinatal health | A             | I      | TG          | 12  | R-BMHSU1995                             | Theo; DC     |
| Robinson et al. 2019 [17]          | UK        | ql     | FA | Oral health services                   | General population                              | Oral diseases                 | A             | FG; I  | TG, HP      | 34  | A&D1997                                 | DA           |

|                            |                 |    |      |                            |                                                        |                     |   |       |        |     |                    |              |
|----------------------------|-----------------|----|------|----------------------------|--------------------------------------------------------|---------------------|---|-------|--------|-----|--------------------|--------------|
| Schatz et al. 2019 [18]    | Uganda          | ql | CA   | STD treatment              | Individuals living in rural areas; elderly individuals | HIV                 | A | I     | TG, HP | 40  | R-BMHSU1995        | DA           |
| Gill et al. 2018 [19]      | UK              | ql | P    | Urologic disease treatment | Individuals with specific disease                      | Urologic diseases   | A | I     | TG     | 12  | R-BMHSU1995        | DA           |
| Grodensky et al. 2018 [20] | USA             | ql | TA   | Health insurance           | Men; individuals with incarceration                    | No specific disease | A | I     | TG     | 20  | BMVP2007           | Theo; DC; DA |
| Ko et al. 2018 [21]        | USA             | ql | CA   | Preventive services        | Women; mothers                                         | Viral Hepatitis     | A | FG    | TG     | 30  | R-BMHSU1995        | DC; DA       |
| Lor et al. 2018 [22]       | USA             | ql | -    | Screening                  | Migrants; women                                        | No specific disease | A | FG    | TG     | 58  | BMVP2000           | DA           |
| Mago et al. 2018 [23]      | Canada          | ql | P, E | Dental care                | Homeless                                               | No specific disease | A | I     | TG     | 25  | BMVP2000           | Theo; DA     |
| Riang'a et al. 2018 [24]   | Kenya           | mm | -    | Natal care                 | (Pregnant) Women; individuals living in rural areas    | No specific disease | A | I     | TG, HP | 64  | A&N1973            | DA           |
| Victor et al. 2018 [25]    | UK              | ql | CA   | General health care        | Elderly individuals; residents in care homes           | No specific disease | A | I     | TG     | 35  | A&N1973            | DC; DA       |
| Bayuo 2017 [26]            | Ghana           | ql | CA   | Outpatient care            | Elderly individuals                                    | No specific disease | A | I     | TG     | 16  | R-BMHSU1995        | Theo; DA     |
| Hawk et al. 2017 [27]      | USA             | ql | CA   | STD treatment              | Individuals with specific disease                      | HIV                 | A | I     | TG, HP | 40  | R-BMHSU1995        | Theo; DC; DA |
| Herrmann et al. 2017 [28]  | Norway; Germany | ql | GT   | General health care        | General population                                     | No specific disease | A | I; O  | TG     | 40  | R-BMHSU1995        | Theo         |
| Lee 2017 [29]              | USA             | mm | GT   | Screening                  | Migrants, women                                        | cancer              | D | I     | TG     | 30  | R-BMHSU1995        | Theo         |
| Levison et al. 2017 [30]   | USA             | ql | E    | STD treatment              | Migrants                                               | HIV                 | A | I     | TG, HP | 51  | BMVP2000           | DC           |
| Parkman et al. 2017 [31]   | UK              | ql | I    | Emergency department       | Individuals with specific disease                      | Addiction           | A | I     | TG     | 30  | R-BMHSU1995, BMHSU | Theo; DA     |
| Rice 2017 [32]             | USA             | ql | P    | Health insurance           | Individuals with incarceration                         | No specific disease | D | I     | TG     | 11  | BMVP2000           | Theo; DC     |
| Rodriguez et al. 2017 [33] | USA             | ql | -    | STD treatment              | Individuals living in rural areas                      | HIV                 | A | I     | HP     | 36  | A&D2001            | DA           |
| Tewari et al. 2017 [34]    | India           | mm | GT   | Mental health care         | Individuals living in rural areas                      | Mental disorders    | A | FG; I | HP     | 78  | R-BMHSU1995        | DA           |
| Velez et al. 2017 [35]     | USA             | ql | GT   | Dental care                | Migrants; women                                        | No specific disease | A | FG    | TG, HP | 103 | BMVP2000           | Theo; DA     |
| White 2017 [36]            | USA             | ql |      | Preventive services        | Men; migrants; young individuals                       | Cancer; CD          | D | I     | TG     | 12  | R-BMHSU1995        | Theo; DA     |
| Henson et al. 2016 [37]    | UK              | ql | CA   | Emergency department       | Individuals with specific disease                      | Cancer              | A | I     | TG, NK | 24  | A&N1973            | Theo; DC; DA |



|                                  |           |    |     |                                                 |                                   |                     |   |       |            |     |                                   |              |
|----------------------------------|-----------|----|-----|-------------------------------------------------|-----------------------------------|---------------------|---|-------|------------|-----|-----------------------------------|--------------|
| Kohno et al. 2016 [38]           | Malaysia  | ql | CA  | General health care                             | Migrants; elderly individuals     | No specific disease | A | FG; I | TG         | 38  | R-BMHSU1995                       | Theo; DA     |
| Maulik et al. 2016 [39]          | India     | mm | TA  | Mental health care                              | Individuals living in rural areas | Mental disorders    | A | FG; I | TG, HP     | 31  | R-BMHSU1995                       | DA           |
| Mukasa 2016 [40]                 | USA       | ql | P   | Natal care                                      | Migrants; women; mothers          | No specific disease | D | I     | TG         | 11  | R-BMHSU1995                       | Theo; DA     |
| Obikunle 2016 [41]               | USA       | ql | P   | Prevention, Screening                           | Women; migrants                   | Cancer              | D | I     | TG         | 14  | R-BMHSU1995                       | Theo; DA     |
| Rachlis et al. 2016 [42]         | Kenya     | ql | -   | Chronic care                                    | Individuals with specific disease | HIV; TB; CD         | A | FG; I | TG, HP, NK | 207 | A&N1973                           | DA           |
| Rachlis et al. 2016 [43]         | Kenya     | ql | CA  | Chronic care                                    | Individuals with specific disease | HIV; TB; CD         | A | FG; I | TG, HP     | 235 | A&N1973                           | DA           |
| Sperber et al. 2016 [44]         | USA       | ql | CA  | Cancer care, health insurance, genomic services | Veterans                          | Cancer              | A | I     | HP         | 58  | Ex-BMPF2002, UM1998               | DC; DA       |
| Thiessen et al. 2016 [45]        | Canada    | ql | CA  | Natal care                                      | (H)P                              | No specific disease | A | I     | HP         | 24  | A&A1974                           | DC; DA       |
| Blanas et al. 2015 [46]          | USA       | ql | GT  | Screening                                       | Migrants                          | Viral Hepatitis     | A | FG    | TG         | 39  | BMVP2000                          | Theo; DC; DA |
| Bradbury-Jones et al. 2015a [47] | UK        | mm | TA  | Natal care                                      | Women                             | No specific disease | A | FG    | HP         | 45  | Ex-BMPF2002, A&D2001              | Theo; DA     |
| Bradbury-Jones et al. 2015b [48] | Scotland  | ql | R&S | Natal care                                      | Women; victims of violence        | No specific disease | A | I     | TG         | 5   | R-BMHSU1995, Ex-BMPF2002, A&D2001 | Theo; DA     |
| Coe et al. 2015 [49]             | USA       | ql | CA  | Medication use                                  | Homeless                          | No specific disease | A | DocA  | TG         | 426 | BMVP2000                          | Theo         |
| Condellius et al. 2015 [50]      | Sweden    | ql | CA  | General health care                             | Elderly individuals               | No specific disease | A | I     | NK         | 14  | A&A1974                           | Theo; DC; DA |
| Conner et al. 2015 [51]          | USA       | ql | P   | End-of-life care                                | Informal caregivers; (H)P         | No specific disease | A | FG    | TG, HP     | 53  | R-BMHSU1995                       | Theo         |
| Holtzman et al. 2015 [52]        | USA       | ql | GT  | STD treatment                                   | Individuals with specific disease | HIV                 | A | I     | TG         | 51  | R-BMHSU1995                       | Theo; DA     |
| Nowgesic 2015 [53]               | Canada    | ql | E   | STD treatment                                   | Indigenous people                 | HIV                 | D | I; O  | TG, HP     | 41  | BMHSU2008                         | DC; DA       |
| Porteous et al. 2015 [54]        | Scotland  | ql | TA  | Self-care                                       | Individuals with specific disease | No specific disease | A | I     | TG         | 24  | R-BMHSU1995, BMHSU2008            | Theo; DC; DA |
| Richards 2015 [55]               | Grenada   | ql | P   | Screening                                       | Women                             | Cancer              | D | I     | TG         | 8   | BMHSU2008                         | Theo; DC; DA |
| Cathers 2014 [56]                | USA       | ql | P   | Outpatient care                                 | (Health) professionals            | Addiction           | D | I     | TG         | 5   | BMVP2000                          | Theo; DA     |
| Serna 2014 [57]                  | USA       | mm | CA  | Dental care                                     | Migrants                          | Oral diseases       | D | I     | TG         | 14  | R-BMHSU1995, BMHSU                | Theo; DC     |
| Artuso et al. 2013[58]           | Australia | ql | TCM | General health care                             | Migrants                          | CD                  | A | FG; I | TG, HP, NK | 21  | R-BMHSU1995                       | Theo         |

|                           |             |    |     |                          |                                                     |                     |   |       |            |     |                                      |              |
|---------------------------|-------------|----|-----|--------------------------|-----------------------------------------------------|---------------------|---|-------|------------|-----|--------------------------------------|--------------|
| Doshi et al. 2013 [59]    | USA         | ql | GT  | Screening                | Men; migrants                                       | HIV                 | A | I     | TG         | 78  | R-BMHSU1995                          | DC; DA       |
| Han et al. 2013 [60]      | USA         | ql | GT  | Prevention, Screening    | Individuals with specific disease                   | Viral Hepatitis     | A | I     | HP         | 20  | A&A1974                              | Theo; DC; DA |
| Majaj et al. 2013 [61]    | Palestine   | ql | -   | General health care      | Women; individuals living in rural areas            | No specific disease | A | I     | TG, HP     | 37  | R-BMHSU1995                          | DC; DA       |
| Noh 2013 [62]             | USA         | ql | CA  | End-of-life-care         | Elderly individuals; migrants                       | No specific disease | A | I     | TG         | 28  | BMVP2000                             | Theo; DC; DA |
| Scott 2013 [63]           | USA         | mm | CA  | Cancer care              | Migrants                                            | Cancer              | D | FG; I | TG, HP, NK | 29  | BMVP2000                             | Theo         |
| Boateng et al. 2012 [64]  | Netherlands | ql | CA  | General health care      | Migrants                                            | No specific disease | A | FG    | TG         | 51  | R-BMHSU1995                          | DC; DA       |
| Callahan 2012 [65]        | USA         | mm | CA  | Cancer care              | Individuals with specific disease                   | Cancer              | D | I     | TG         | 7   | BMVP2000                             | Theo         |
| Dergal 2012 [66]          | Canada      | mm | GT  | Nursing                  | Caregivers                                          | No specific disease | D | I     | TG         | 10  | A&N1973                              | Theo; DA     |
| Chiu 2011 [67]            | USA         | ql | E   | General health care      | Migrants, elderly individuals                       | No specific disease | D | I     | TG         | 18  | R-BMHSU1995                          | Theo; DC     |
| Corboy et al. 2011 [68]   | Australia   | mm | A&S | Mental health care       | Men; individuals living in rural areas              | Cancer              | A | I     | TG, HP     | 12  | R-BMHSU1995                          | DA           |
| Goh 2011 [69]             | Singapore   | mm | P   | Post-acute care services | Elderly individuals                                 | No specific disease | A | I     | TG, HP, NK | 29  | R-BMHSU1995, A&N1973, A&A1974, BMHSU | DA           |
| Chiu 2010 [70]            | USA         | ql | E   | E-health                 | Migrants; caregivers                                | Dementia            | D | I     | TG         | 14  | R-BMHSU1995, A&N1973                 | Theo; DC     |
| Gräßel et al. 2010 [71]   | Germany     | mm | CA  | Caregiver counselling    | Informal caregiver                                  | No specific disease | A | Q     | NK         | 306 | A&N1973                              | Theo; DC; DA |
| Rööst et al. 2009 [72]    | Bolivia     | ql | AI  | Natal care               | Women; survivors of a severe pregnancy complication | No specific disease | A | I     | TG         | 30  | R-BMHSU1995                          | Theo         |
| Andrasik et al. 2008 [73] | USA         | ql | CA  | Screening                | Women; individuals with low socio-economic status   | HIV                 | A | I     | TG         | 35  | R-BMHSU1995                          | Theo; DA     |
| Butler et al. 2008 [74]   | USA         | ql | -   | General health care      | Women; individuals living in rural area             | No specific disease | A | I     | TG         | 8   | R-BMHSU1995                          | Theo; DA     |
| Herrera et al. 2008 [75]  | USA         | mm | -   | Longterm care            | Migrants                                            | No specific disease | A | I     | NK         | 66  | R-BMHSU1995                          | Theo; DC; DA |
| Bradley et al. 2002 [76]  | USA         | ql | GT  | Longterm care            | Women; migrants; elderly individuals                | Mental disorders    | A | FG    | TG         | 96  | R-BMHSU1995                          | Theo         |
| Go et al. 2002 [77]       | Vietnam     | ql | -   | STD treatment            | Women                                               | STD                 | A | I     | TG         | 36  | R-BMHSU1995                          | DC; DA       |

Country – UK: United Kingdom, USA: United States of America

Methods – mm: mixed-method study; ql: qualitative study

Methodological orientation: CA: Content analysis; E: Ethnography; GT: Ground Theory; P: Phenomenology; I: Iterative Categorisation; TA: Thematic analysis; AI: Analytic induction; A&S: Coding & Analysis Auerbach & Silverstein; TCM: Miles and Huberman's conceptual matrix (TCM); R&S: Framework analysis of Ritchie and Spencer; FA: Framework analysis

Disease of interest – TB: tuberculosis; STD: Sexually transmitted diseases

Data collection – I: Interview, FG: Focus group, O: Observation, DocA: Document analysis, Q: Questionnaire

Respondents – TG: target group, HP: Health professionals, NK: next of kin

Document type – A: Article, D: Dissertation

Model – BMHSU: Andersen 1968 [78]; A&N1973: Andersen and Newman's Framework of Viewing Health Services Utilization [79]; A&A1974: Aday and Andersen's Framework for the study of access to medical care [80]; R-BMHSU1995: Andersen 1995 [81]; A&D1997: Ethnicity, aging, and oral health outcomes: a conceptual framework [82]; UM1998: Phillips, Morrison, Andersen & Aday – Utilization Model [83]; BMVP2000: Behavioral Model for Vulnerable Populations [84]; A&D2001: Behavioral Model of Health Services Use including contextual and individual characteristics [85]; Ex-BMPF2002: expanded Andersen model with psychosocial factors in Long-Term Care [76]; A&N2005: Andersen & Newman Individual Determinants of Health Service Utilization; BMVP2007: Stein, Andersen & Gelberg [86]; BMHSU2008 Andersen 2008 [87]; A&D&B 2013: A behavioral model of health services use including contextual and individual characteristics [88]; mhealth PNE framework [89]

Theo: Theoretical background, DC: Data collection, DA: Data analysis

## REFERENCES

- 1 Chao Y.-Y., Seo J.Y., Katigbak C., et al. Utilization of Mental Health Services Among Older Chinese Immigrants in New York City. *Community Ment Health J* 2020.
- 2 Due C., Aldam I., Ziersch A. Understanding oral health help-seeking among Middle Eastern refugees and asylum seekers in Australia: An exploratory study. *Community Dent Oral Epidemiol* 2020.
- 3 Isaak C.A., Mota N., Medved M., et al. Conceptualizations of help-seeking for mental health concerns in First Nations communities in Canada: A comparison of fit with the Andersen Behavioral Model. *Transcult Psychiatry* 2020. <http://tps.sagepub.com/content/by/year>.
- 4 Shewamene Z, Dune T, Smith CA. Use of traditional and complementary medicine for maternal health and wellbeing by African migrant women in Australia: a mixed method study. *BMC Complement Med Ther* 2020;20(1):60.
- 5 Travers J.L., Hirschman K.B., Naylor M.D. Adapting Andersen's expanded behavioral model of health services use to include older adults receiving long-term services and supports. *BMC Geriatr* 2020;20(1):58.
- 6 Bascur-Castillo C, Araneda-Gatica V, Castro-Arias H, et al. Determinants in the process of seeking help for urinary incontinence in the Chilean health system. *Int J Gynaecol Obstet* 2019;144(1):103–11.
- 7 Briones-Vozmediano E., Castellanos-Torres E., Goicolea I., et al. Challenges to Detecting and Addressing Intimate Partner Violence Among Roma Women in Spain: Perspectives of Primary Care Providers. *J Interpers Violence* 2019;886260519872299.
- 8 Coleman TM. Help-seeking experiences of African American men with depression 2019.
- 9 Fleury M.-J., Grenier G., Farand L., et al. Reasons for Emergency Department Use among Patients with Mental Disorders. *Psychiatr Q* 2019;90(4):703–16. <http://www.wkap.nl/journalhome.htm/0033-2720>.
- 10 Green D.C., Wheeler E.M. A Qualitative Exploration of Facilitators for Health Service Use among Aging Gay Men Living with HIV. *J. Int. Assoc. Providers AIDS Care* 2019;18. <http://jia.sagepub.com/content/by/year>.
- 11 Heidari P., Cross W., Weller C., et al. Rheumatologists' insight into medication adherence in patients with rheumatoid arthritis: A qualitative study. *Int. J. Rheum. Dis.* 2019;22(9):1695–705. [http://onlinelibrary.wiley.com/journal/10.1111/\(ISSN\)1756-185X](http://onlinelibrary.wiley.com/journal/10.1111/(ISSN)1756-185X).
- 12 Koce F, Randhawa G, Ochieng B. Understanding healthcare self-referral in Nigeria from the service users' perspective: a qualitative study of Niger state. *BMC Health Serv Res* 2019;19(1):209.

- 1  
2  
3 13 Navarro-Millan I, Zinski A, Shurbaji S, et al. Perspectives of Rheumatoid Arthritis Patients on Electronic Communication and Patient-Reported Outcome Data Collection: A Qualitative Study. *Arthritis Care and Research* 2019;71(1):80–87.
- 4  
5 14 Opoku D, Busse R, Quentin W. Achieving Sustainability and Scale-Up of Mobile Health Noncommunicable Disease Interventions in Sub-Saharan Africa: Views of Policy Makers in Ghana. *JMIR Mhealth Uhealth* 2019;7(5):e11497.
- 6  
7 15 Perry R, Gard Read J, Chandler C, et al. Understanding Participants' Perceptions of Access to and Satisfaction With Chronic Disease Prevention Programs. *Health Educ Behav* 2019;1090198118822710.
- 8  
9 16 Roberson M.C. Refusal of epidural anesthesia for labor pain management by African American parturients: An examination of factors. *AANA J.* 2019;87(4):299–304.  
10 <https://www.aana.com/publications/aana-journal>.
- 11 17 Robinson P.G., Douglas G.V.A., Gibson B.J., et al. Remuneration of primary dental care in England: A qualitative framework analysis of perspectives of a new service delivery model incorporating incentives for improved access, quality and health outcomes. *BMJ Open* 2019;9(10):e031886. <http://bmjopen.bmj.com/content/early/by/section>.
- 12  
13 18 Schatz E, Seeley J, Negin J, et al. "For us here, we remind ourselves": strategies and barriers to ART access and adherence among older Ugandans. *BMC Public Health* 2019;19(1):131.
- 14  
15 19 Gill P, Logan K, John B, et al. Participants' experiences of ketamine bladder syndrome: A qualitative study. *International Journal of Urological Nursing* 2018;12(2/3):76–83. <http://www.redi-bw.de/db/ebSCO.php/search.ebscohost.com/login.aspx%3fdirect%3dtrue%26db%3dcin20%26AN%3d132481296%26site%3dehost-live>.
- 16  
17 20 Grodensky CA, Rosen DL, Blue CM, et al. Medicaid Enrollment among Prison Inmates in a Non-expansion State: Exploring Predisposing, Enabling, and Need Factors Related to Enrollment Pre-incarceration and Post-Release. *Journal of urban health: bulletin of the New York Academy of Medicine* 2018;95(4):454–66.
- 18  
19 21 Ko LK, Taylor VM, Mohamed FB, et al. "We brought our culture here with us": A qualitative study of perceptions of HPV vaccine and vaccine uptake among East African immigrant mothers. *Papillomavirus Res* 2018;7:21–25.
- 20  
21 22 Lor B, Ornelas IJ, Magarati M, et al. We Should Know Ourselves: Burmese and Bhutanese Refugee Women's Perspectives on Cervical Cancer Screening. *J Health Care Poor Underserved* 2018;29(3):881–97.
- 22  
23 23 Mago A, MacEntee MI, Brondani M, et al. Anxiety and anger of homeless people coping with dental care. *Community Dent Oral Epidemiol* 2018;46(3):225–30.
- 24  
25 24 Rianga'a RM, Nangulu AK, Broerse JEW. "I should have started earlier, but I was not feeling ill!" Perceptions of Kalenjin women on antenatal care and its implications on initial access and differentials in patterns of antenatal care utilization in rural Uasin Gishu County Kenya. *PLoS ONE* 2018;13(10):e0202895.
- 26  
27 25 Victor C, Davies S, Dickinson A, et al. "It just happens". Care home residents' experiences and expectations of accessing GP care. *Arch Gerontol Geriatr* 2018;79:97–103.
- 28  
29 26 Bayuo J. Experiences with out-patient hospital service utilisation among older persons in the Asante Akyem North District- Ghana. *BMC Health Serv Res* 2017;17(1):652.
- 30  
31 27 Hawk M, Coulter RWS, Egan JE, et al. Exploring the Healthcare Environment and Associations with Clinical Outcomes of People Living with HIV/AIDS. *AIDS Patient Care STDS* 2017;31(12):495–503.
- 32  
33 28 Herrmann WJ, Haarmann A, Bærheim A. A sequential model for the structure of health care utilization. *PLoS ONE* 2017;12(5):e0176657.
- 34  
35 29 Lee MH. Breast cancer screening behavior in Korean immigrant women in the United States 2017.
- 36  
37 30 Levison JH, Bogart LM, Khan IF, et al. "Where It Falls Apart": Barriers to Retention in HIV Care in Latino Immigrants and Migrants. *AIDS Patient Care STDS* 2017;31(9):394–405.
- 38  
39 31 Parkman T, Neale J, Day E, et al. Qualitative exploration of why people repeatedly attend emergency departments for alcohol-related reasons. *BMC Health Serv Res* 2017;17(1):140.
- 40  
41 32 Rice MB. Attitudes of women offenders towards medicaid enrollment and coverage under the Affordable Care Act 2017.
- 42  
43 33 Rodriguez HR, Dobalian A. Provider and Administrator Experiences With Providing HIV Treatment and Prevention Services in Rural Areas. *AIDS Educ Prev* 2017;29(1):77–91.
- 44  
45 34 Tewari A, Kallakuri S, Devarapalli S, et al. Process evaluation of the systematic medical appraisal, referral and treatment (SMART) mental health project in rural India. *BMC Psychiatry* 2017;17(1):385.
- 46  
35 35 Velez D, Palomo-Zerfas A, Nunez-Alvarez A, et al. Facilitators and Barriers to Dental Care Among Mexican Migrant Women and Their Families in North San Diego County. *J Immigr Minor Health* 2017;19(5):1216–26.

- 1  
2  
3 36 White AW. The role of social and cultural factors on preventive health service use among young, rural, African American men: A narrative inquiry 2017.
- 4 37 Henson LA, Higginson IJ, Daveson BA, et al. 'I'll be in a safe place': a qualitative study of the decisions taken by people with advanced cancer to seek emergency department care. *BMJ Open* 2016;6(11).  
5  
6 <http://gateway.webofknowledge.com/gateway/Gateway.cgi?GWVersion=2&SrcAuth=SwissAcademicSoftware&SrcApp=Citavi&DestLinkType=FullRecord&DestApp=WOS&KeyUT=000391303400076>.
- 7  
8 38 Kohno A, Nik Farid ND, Musa G, et al. Factors affecting Japanese retirees' healthcare service utilisation in Malaysia: a qualitative study. *BMJ Open* 2016;6(3):e010668.
- 9 39 Maulik PK, Tewari A, Devarapalli S, et al. The Systematic Medical Appraisal, Referral and Treatment (SMART) Mental Health Project: Development and Testing of Electronic Decision Support System and Formative Research to Understand Perceptions about Mental Health in Rural India. *PLoS ONE* 2016;11(10):e0164404.
- 10  
11 40 Mukasa B. Maternal and child health access disparities among recent African immigrants in the United States 2016.
- 12 41 Obikunle AF. Barriers to breast cancer prevention and screening among African American women 2016.
- 13 42 Rachlis B, Naanyu V, Wachira J, et al. Community Perceptions of Community Health Workers (CHWs) and Their Roles in Management for HIV, Tuberculosis and Hypertension in Western Kenya. *PLoS ONE* 2016;11(2):e0149412.
- 14  
15 43 Rachlis B, Naanyu V, Wachira J, et al. Identifying common barriers and facilitators to linkage and retention in chronic disease care in western Kenya. *BMC Public Health* 2016;16:741.
- 16 44 Sperber NR, Andrews SM, Voils CI, et al. Barriers and Facilitators to Adoption of Genomic Services for Colorectal Care within the Veterans Health Administration. *J Pers Med* 2016;6(2).
- 17 45 Thiessen K, Heaman M, Mignone J, et al. Barriers and facilitators related to implementation of regulated midwifery in Manitoba: a case study. *BMC Health Serv Res* 2016;16:1–22.  
18 <http://www.redi-bw.de/db/ebSCO.php/search.ebscohost.com/login.aspx?direct=true&db=cin2026AN%3d113906425%26site%3dehost-live>.
- 19 46 Blanas DA, Nichols K, Bekele M, et al. Adapting the Andersen model to a francophone West African immigrant population: hepatitis B screening and linkage to care in New York City. *J Community Health* 2015;40(1):175–84.
- 20  
21 47 Bradbury-Jones C, Breckenridge JP, Devaney J, et al. Priorities and strategies for improving disabled women's access to maternity services when they are affected by domestic abuse: a multi-method study using concept maps. *BMC Pregnancy Childbirth* 2015;15:350.
- 22 48 Bradbury-Jones C, Breckenridge JP, Devaney J, et al. Disabled women's experiences of accessing and utilising maternity services when they are affected by domestic abuse: a critical incident technique study. *BMC Pregnancy Childbirth* 2015;15:181.
- 23  
24 49 Coe AB, Moczygamba LR, Gatewood SBS, et al. Medication adherence challenges among patients experiencing homelessness in a behavioral health clinic. *Res Social Adm Pharm* 2015;11(3):e110-20.
- 25  
26 50 Condelius A, Andersson M. Exploring access to care among older people in the last phase of life using the behavioural model of health services use: a qualitative study from the perspective of the next of kin of older persons who had died in a nursing home. *BMC Geriatr* 2015;15:138.
- 27  
28 51 Conner NE, Chase SK. Decisions and caregiving: End of life among Blacks from the perspective of informal caregivers and decision makers. *Am J Hosp Palliat Care* 2015;32(4):454–63.  
29 <http://www.redi-bw.de/db/ebSCO.php/search.ebscohost.com/login.aspx?direct=true&db=psyh%26AN%3d2015-21262-013%26site%3dehost-live>.
- 30 52 Holtzman CW, Shea JA, Glanz K, et al. Mapping patient-identified barriers and facilitators to retention in HIV care and antiretroviral therapy adherence to Andersen's Behavioral Model. *AIDS Care* 2015;27(7):817–28.
- 31  
32 53 Nowgesic EF. Antiretroviral Therapy Access, Acceptance and Adherence among Urban Indigenous Peoples Living with HIV in Saskatchewan: The Indigenous Red Ribbon Storytelling Study 2015.
- 33  
34 54 Porteous T, Wyke S, Hannaford P, et al. Self-care behaviour for minor symptoms: can Andersen's Behavioral Model of Health Services Use help us to understand it? *Int J Pharm Pract* 2015;23(1):27–35.
- 35  
36 55 Richards C. Women's experiences with the follow-up system for cervical cancer in a developing country. 76 2015.
- 37  
38  
39  
40  
41  
42  
43  
44  
45  
46

- 1  
2  
3 56 Cathers LA. Exploring substance use disorders community outpatient counselors' experiences treating clients with co-occurring medical conditions: An interpretative phenomenological analysis 2014.
- 4  
5 57 Serna CA. Exploring oral health problems in adult hispanic migrant farmworkers: A mixed-methods approach 2014.
- 6 58 Artuso S, Cargo M, Brown A, et al. Factors influencing health care utilisation among Aboriginal cardiac patients in central Australia: a qualitative study. *BMC Health Serv Res* 2013;13:83.
- 7 59 Doshi RK, Malebranche D, Bowleg L, et al. Health care and HIV testing experiences among Black men in the South: implications for "Seek, Test, Treat, and Retain" HIV prevention strategies. *AIDS Patient Care STDS* 2013;27(2):123–33.
- 8  
9 60 Han H, Perumalswami P, Kleinman L, et al. Voices of multi-ethnic providers in NYC: Health care for viral hepatitis. *Hepatology* 2013;Conference 64th Annual Meeting of the American Association for the Study of Liver Diseases The Liver Meeting 2013. Washington, DC United States. Conference Publication:1195A-1196A.  
10 <http://ovidsp.ovid.com/ovidweb.cgi?T=JS&CSC=Y&NEWS=N&PAGE=fulltext&D=emed14&AN=71238042>.
- 11  
12 61 Majaj L, Nassar M, Allegri M. "It's not easy to acknowledge that I'm ill": a qualitative investigation into the health seeking behavior of rural Palestinian women. *BMC Womens Health* 2013;13.  
13 <http://gateway.webofknowledge.com/gateway/Gateway.cgi?GWVersion=2&SrcAuth=SwissAcademicSoftware&SrcApp=Citavi&DestLinkType=FullRecord&DestApp=WOS&KeyUT=000320055000001>.
- 14  
15 62 Noh H. Terminally ill Black elders: Making the choice to receive hospice care 2013.
- 16 63 Scott KL. Delay to treatment for Latinos diagnosed with lung and head-and-neck cancers: Application of the behavioral model for vulnerable populations 2013.
- 17 64 Boateng L, Nicolaou M, Dijkshoorn H, et al. An exploration of the enablers and barriers in access to the Dutch healthcare system among Ghanaians in Amsterdam. *BMC Health Serv Res* 2012;12:75.
- 18  
19 65 Callahan CC. Cancer, vulnerability, and financial quality of life: A mixed methods study 2012.
- 20 66 Dergal J. Family members' use of private companions in nursing homes: A mixed methods study 2012.
- 21 67 Chiu MWY. Psychosocial responses to falling in older Chinese immigrants living in the community 2011.
- 22 68 Corboy D, McDonald J, McLaren S. Barriers to accessing psychosocial support services among men with cancer living in rural Australia: Perceptions of men and health professionals. *Int J Mens Health* 2011;10(2):163–83. <http://www.redi-bw.de/db/ebSCO.php/search.ebscohost.com/login.aspx%3fdirect%3dtrue%26db%3dpsyh%26AN%3d2011-21872-004%26site%3dehost-live>.
- 23  
24 69 Goh SN. Post Acute Care of the Elderly in Singapore What Factors Influence Use of Services? *Asia Pacific Journal of Social Work and Development* 2011;21(1):31–53.  
25 <http://gateway.webofknowledge.com/gateway/Gateway.cgi?GWVersion=2&SrcAuth=SwissAcademicSoftware&SrcApp=Citavi&DestLinkType=FullRecord&DestApp=WOS&KeyUT=000292427400004>.
- 26  
27 70 Chiu TML. Usage and Non-usage Behaviour of eHealth Services Among Chinese Canadians Caring for a Family Member with Dementia 2008.
- 28 71 Gräßel E, Luttenberger K, Trilling A, et al. Counselling for dementia caregivers-predictors for utilization and expected quality from a family caregiver's point of view. *Eur J Ageing* 2010;7(2):111–19.
- 29  
30 72 Rööst M, Jonsson C, Liljestrand J, et al. Social differentiation and embodied dispositions: a qualitative study of maternal care-seeking behaviour for near-miss morbidity in Bolivia. *Reprod Health* 2009;6:13.
- 31  
32 73 Andrasik MP, Rose R, Pereira D, et al. Barriers to cervical cancer screening among low-income HIV-positive African American women. *J Health Care Poor Underserved* 2008;19(3):912–25.
- 33 74 Butler C, Kim-Godwin Y, Fox JA. Exploration of health care concerns of Hispanic women in a rural southeastern North Carolina community. *Online Journal of Rural Nursing and Health Care* 2008;8(2):22–32.
- 34  
35 75 Herrera AP, Lee J, Palos G, et al. Cultural influences in the patterns of long-term care use among Mexican American family caregivers. *J Appl Gerontol* 2008;27(2):141–65. <http://www.redi-bw.de/db/ebSCO.php/search.ebscohost.com/login.aspx%3fdirect%3dtrue%26db%3dpsyh%26AN%3d2008-03902-002%26site%3dehost-live>.
- 36  
37 76 Bradley EH, McGraw SA, Curry L, et al. Expanding the Andersen model: the role of psychosocial factors in long-term care use. *Health Services Research* 2002;37(5):1221–42.
- 38 77 Go VF-I, Quan VM, Chung A, et al. Gender gaps, gender traps: sexual identity and vulnerability to sexually transmitted diseases among women in Vietnam. *Soc Sci Med* 2002;55(3):467–81.
- 39  
40  
41  
42  
43  
44  
45  
46

- 1  
2  
3 78 Andersen R. A behavioral model of families' use of health services. Chicago, Ill.: Univ. of Chicago 1968.
- 4 79 Andersen R, Newman JF. Societal and individual determinants of medical care utilization in the United States. *Milbank Mem Fund Q Health Soc* 1973;51(1):95–124.
- 5 80 Aday LA, Andersen R. A framework for the study of access to medical care. *Health Services Research* 1974;9(3):208–20.
- 6 81 Andersen RM. Revisiting the Behavioral Model and Access to Medical Care: Does it Matter? *J Health Soc Behav* 1995;36(1):1–10.
- 7 82 Andersen RM, Davidson PL. Ethnicity, aging, and oral health outcomes: a conceptual framework. *Adv Dent Res* 1997;11(2):203–09.
- 8 83 Phillips KA, Morrison KR, Andersen R, et al. Understanding the context of healthcare utilization: assessing environmental and provider-related variables in the behavioral model of utilization. *Health Services Research* 1998;33(3):571–96.
- 9  
10 84 Gelberg L, Andersen RM, Leake B. The Behavioral Model for Vulnerable Populations: Application to Medical Care Use and Outcomes for Homeless People. *Health Services Research*  
11 2000;34(6) (accessed 13 Sep 2018).
- 12 85 Andersen RM, Davidson PL. Improving access to care in America. In: Andersen R, Kominski GF, Rice TH, eds. *Changing the US health care system: Key issues in health services, policy,*  
13 *and management*, 2nd edn. San Francisco: Jossey-Bass 2001:3–31.
- 14 86 Stein JA, Andersen R, Gelberg L. Applying the Gelberg-Andersen behavioral model for vulnerable populations to health services utilization in homeless women. *J Health Psychol*  
15 2007;12(5):791–804.
- 16 87 Andersen RM. National Health Surveys and the Behavioral Model of Health Services Use. *Med Care* 2008;46(7):647–53.
- 17 88 Andersen RM, Davidson PL, Baumeister SE. Improving Acces to Care. In: Kominski GF, ed. *Changing the U.S. health care system: Key issues in health services policy and management*,  
18 4th edn. San Francisco, California: Jossey-Bass 2013:33–69.
- 19 89 Opoku D, Scott P, Quentin W. Healthcare Professionals' Perceptions of the Benefits and Challenges of a Teleconsultation Service in the Amansie-West District of Ghana. *Telemedicine*  
20 *journal and e-health the official journal of the American Telemedicine Association* 2015;21(9):748–55.
- 21  
22  
23  
24  
25  
26  
27  
28  
29  
30  
31  
32  
33  
34  
35  
36  
37  
38  
39  
40  
41  
42  
43  
44  
45  
46
