# Supplementary material for: Application of Andersen’s behavioural model of health services use: a scoping review with a focus on qualitative health services research
Source: PubMed Central journal article supplement — BMJ Open. 2021 May 5;11(5):e045018. doi: 10.1136/bmjopen-2020-045018 (PMC8103375; doi:10.1136/bmjopen-2020-045018), 2021-05-05
Supplement: bmjopen-2020-045018supp002.pdf [file bmjopen-2020-045018supp002.pdf]

## Additional file 2: Exemplary search strategy

| <b>Exemplary search strategy – Medline via Pubmed</b> |                                                                        |
|-------------------------------------------------------|------------------------------------------------------------------------|
| #1                                                    | "Andersen RM" [Author]                                                 |
| #2                                                    | "Andersen R" [Author]                                                  |
| #3                                                    | #1 OR #2                                                               |
| #4                                                    | "Andersen model"                                                       |
| #5                                                    | "Andersen's model"                                                     |
| #6                                                    | #4 OR #5                                                               |
| #7                                                    | "Behavioral Model of Health Services Use"                              |
| #8                                                    | "Behavioural Model of Health Services Use"                             |
| #9                                                    | #7 OR #8                                                               |
| #10                                                   | andersen*                                                              |
| #11                                                   | "behavior model"                                                       |
| #12                                                   | "behaviour model"                                                      |
| #13                                                   | "behavioral model"                                                     |
| #14                                                   | "behavioural model"                                                    |
| #15                                                   | (#11 OR #12 OR #13 OR #14) AND #10                                     |
| #16                                                   | "health model"                                                         |
| #17                                                   | #16 AND #10                                                            |
| #18                                                   | utilization                                                            |
| #19                                                   | utilisation                                                            |
| #20                                                   | "Facilities and Services Utilization"[Mesh]                            |
| #21                                                   | "Patient Acceptance of Health Care"[Mesh]                              |
| #22                                                   | model                                                                  |
| #23                                                   | (#18 OR #19 OR #20 OR #21) AND #22 AND #10                             |
| #24                                                   | aday*                                                                  |
| #25                                                   | davidson*                                                              |
| #26                                                   | newman*                                                                |
| #27                                                   | gelberg*                                                               |
| #28                                                   | (#22 OR #23 OR #24 OR #25) AND #10                                     |
| #29                                                   | predisposing                                                           |
| #30                                                   | enabling                                                               |
| #31                                                   | need                                                                   |
| #32                                                   | #27 AND #28 AND #29                                                    |
| #33                                                   | (#27 OR #28 OR #29) AND #10                                            |
| #34                                                   | "andersen framework"                                                   |
| #35                                                   | "Behavioral Model for Vulnerable Populations"                          |
| #36                                                   | #3 OR #6 OR #9 OR #15 OR #17 OR #23 OR #28 OR #32 OR #33 OR #34 OR #35 |
| #37                                                   | animals                                                                |
| #38                                                   | #36 NOT #37                                                            |
| #39                                                   | #36 NOT #37 Filters: Publication date from 1968/01/01 to 2019/04/09    |
