# Supplementary material for: Application of Andersen’s behavioural model of health services use: a scoping review with a focus on qualitative health services research
Source: PubMed Central journal article supplement — BMJ Open. 2021 May 5;11(5):e045018. doi: 10.1136/bmjopen-2020-045018 (PMC8103375; doi:10.1136/bmjopen-2020-045018), 2021-05-05
Supplement: bmjopen-2020-045018supp003.pdf [file bmjopen-2020-045018supp003.pdf]

## Additional file 3: All characteristics and categories

| Diseases of interest          | Total n=1,879  |    |
|-------------------------------|----------------|----|
|                               | n <sup>1</sup> | %  |
| no specific disease           | 936            | 50 |
| mental disorder               | 229            | 12 |
| cancer                        | 134            | 7  |
| HIV                           | 96             | 5  |
| addiction                     | 82             | 4  |
| diabetes                      | 43             | 2  |
| cardiovascular disease        | 42             | 2  |
| dementia                      | 39             | 2  |
| oral diseases                 | 28             | 1  |
| chronic disease in general    | 25             | 1  |
| arthritis                     | 20             | 1  |
| maternal and perinatal health | 17             | 1  |
| disability                    | 16             | 1  |
| violence experience           | 13             | 1  |
| alzheimer's disease           | 12             | 1  |
| asthma                        | 11             | 1  |
| brain injury                  | 10             | 1  |
| flu                           | 7              | 0  |
| stroke                        | 7              | 0  |
| urologic diseases             | 7              | 0  |
| multiple sclerosis            | 7              | 0  |
| pulmonary disease             | 7              | 0  |
| osteoporosis                  | 6              | 0  |
| hepatitis B or C              | 5              | 0  |
| influenza                     | 5              | 0  |
| tuberculosis                  | 5              | 0  |
| parkinson's disease           | 5              | 0  |
| trauma                        | 4              | 0  |
| epilepsy                      | 4              | 0  |
| gastrointestinal diseases     | 4              | 0  |
| back pain                     | 4              | 0  |
| eye problems                  | 4              | 0  |
| autism spectrum disorder      | 3              | 0  |
| chronic pain                  | 3              | 0  |
| hearing loss                  | 3              | 0  |
| HPV                           | 3              | 0  |
| spinal cord injury            | 3              | 0  |
| hip or knee arthroplasty      | 3              | 0  |
| suicidal ideation or suicide  | 3              | 0  |
| others                        | 44             | 2  |

Legend:

<sup>1</sup> Since some publications included multiple care settings, target groups etc. the sum might be greater than 100%

## Additional file 3: All characteristics and categories

| Target groups                              | Total n=1,879  |    |
|--------------------------------------------|----------------|----|
|                                            | n <sup>1</sup> | %  |
| elderly individuals                        | 481            | 26 |
| migrants                                   | 322            | 17 |
| females                                    | 256            | 14 |
| general population                         | 255            | 14 |
| men                                        | 203            | 11 |
| individuals with mental disorder           | 127            | 7  |
| community-dwelling individuals             | 74             | 4  |
| caregivers                                 | 71             | 4  |
| individuals with low socio-economic status | 69             | 4  |
| individuals living in rural areas          | 68             | 4  |
| individuals with HIV                       | 65             | 3  |
| young individuals                          | 56             | 3  |
| soldiers or veterans                       | 56             | 3  |
| individuals with cancer                    | 50             | 3  |
| insured individuals                        | 39             | 2  |
| mothers                                    | 36             | 2  |
| individuals with diabetes                  | 33             | 2  |
| individuals living in urban areas          | 31             | 2  |
| individuals with cardiovascular disease    | 29             | 2  |
| individuals with disabilities              | 25             | 1  |
| patients                                   | 21             | 1  |
| individuals with dementia                  | 20             | 1  |
| LSBTTIQ*                                   | 20             | 1  |
| people of color                            | 18             | 1  |
| individuals with arthritis                 | 17             | 1  |
| individuals with chronic disease           | 17             | 1  |
| employed individuals                       | 15             | 1  |
| vulnerable individuals                     | 15             | 1  |
| individuals with incarceration experience  | 13             | 1  |
| students                                   | 13             | 1  |
| health care providers                      | 12             | 1  |
| individuals with asthma                    | 11             | 1  |
| inpatients                                 | 11             | 1  |
| nursing home residents                     | 10             | 1  |
| individuals with brain injury              | 10             | 1  |
| care-dependent individuals                 | 10             | 1  |
| victims of violence                        | 9              | 0  |
| no specific population                     | 8              | 0  |
| uninsured individuals                      | 8              | 0  |
| individuals with cognitive impairment      | 7              | 0  |
| ethnic minorities                          | 7              | 0  |
| high-risk individuals                      | 5              | 0  |
| individuals at the end of life             | 5              | 0  |
| individuals in the emergency department    | 5              | 0  |
| individuals with stroke                    | 5              | 0  |
| married individuals                        | 5              | 0  |
| individuals with chronic pain              | 5              | 0  |

## Additional file 3: All characteristics and categories

| Target groups                               | Total n=1,879  |   |
|---------------------------------------------|----------------|---|
|                                             | n <sup>1</sup> | % |
| individuals with parkinson's disease        | 5              | 0 |
| individuals with multiple sclerosis         | 5              | 0 |
| complementary medicine clients              | 4              | 0 |
| discharged individuals                      | 4              | 0 |
| frail individuals                           | 4              | 0 |
| individuals with epilepsy                   | 4              | 0 |
| individuals with oral diseases              | 4              | 0 |
| outpatients                                 | 4              | 0 |
| primary care patients                       | 4              | 0 |
| parents                                     | 4              | 0 |
| individuals with experienced trauma         | 4              | 0 |
| border residents                            | 3              | 0 |
| individuals with alzheimer's disease        | 3              | 0 |
| individuals with back pain                  | 3              | 0 |
| individuals with hearing loss               | 3              | 0 |
| individuals with osteoporosis               | 3              | 0 |
| individuals with pulmonary disease          | 3              | 0 |
| individuals with spinal cord injury         | 3              | 0 |
| individuals with tuberculosis               | 3              | 0 |
| individuals with a hip or knee arthroplasty | 3              | 0 |
| individuals with obesity                    | 3              | 0 |
| sex workers                                 | 3              | 0 |
| addictive individuals                       | 3              | 0 |
| others                                      | 50             | 3 |

## Legend:

<sup>1</sup> Since some publications included multiple care settings, target groups etc. the sum might be greater than 100%.

## Additional file 3: All characteristics and categories

| Care settings                          | Total n=1,879  |    |
|----------------------------------------|----------------|----|
|                                        | n <sup>1</sup> | %  |
| general health care                    | 471            | 25 |
| nursing                                | 237            | 13 |
| mental health services                 | 222            | 12 |
| medication use                         | 115            | 6  |
| Screening                              | 107            | 6  |
| oral health services                   | 104            | 6  |
| inpatient care                         | 99             | 5  |
| natal care                             | 77             | 4  |
| emergency care                         | 73             | 4  |
| addiction services                     | 56             | 3  |
| health expenditure                     | 44             | 2  |
| social services                        | 43             | 2  |
| community-based services               | 43             | 2  |
| preventive services                    | 43             | 2  |
| complementary and alternative medicine | 41             | 2  |
| outpatient care                        | 41             | 2  |
| HIV treatment services                 | 35             | 2  |
| cancer care                            | 27             | 1  |
| end-of-life care                       | 24             | 1  |
| e-health                               | 20             | 1  |
| vaccination                            | 19             | 1  |
| rehabilitation services                | 17             | 1  |
| patient satisfaction                   | 16             | 1  |
| health-related quality of life         | 14             | 1  |
| health insurance                       | 13             | 1  |
| health literacy                        | 12             | 1  |
| veterans health administration         | 9              | 0  |
| eye care                               | 8              | 0  |
| physical therapy                       | 8              | 0  |
| health behavior                        | 7              | 0  |
| self care                              | 6              | 0  |
| health information                     | 5              | 0  |
| chronic pain treatment                 | 5              | 0  |
| chronic care in general                | 4              | 0  |
| hyperlipidemia treatment               | 4              | 0  |
| health situation                       | 4              | 0  |
| case management                        | 3              | 0  |
| osteoporosis treatment                 | 3              | 0  |
| services for caregivers                | 3              | 0  |
| medical assistive devices              | 3              | 0  |
| physician trust                        | 3              | 0  |
| diabetes treatment                     | 3              | 0  |
| others                                 | 36             | 2  |

Legend:

<sup>1</sup> Since some publications included multiple care settings, target groups etc. the sum might be greater than 100%.
