# Supplementary material for: Application of Andersen’s behavioural model of health services use: a scoping review with a focus on qualitative health services research
Source: PubMed Central journal article supplement — BMJ Open. 2021 May 5;11(5):e045018. doi: 10.1136/bmjopen-2020-045018 (PMC8103375; doi:10.1136/bmjopen-2020-045018), 2021-05-05
Supplement: bmjopen-2020-045018supp004.pdf [file bmjopen-2020-045018supp004.pdf]

Additional file 4: Characteristics of publications with qualitative study design

| Author & year of publication       | Country   | Method |    | Care Setting                           | Target group of interest                        | Disease of interest           | Document type | Survey | Respondents | N   | Application of the Andersen model       |              |
|------------------------------------|-----------|--------|----|----------------------------------------|-------------------------------------------------|-------------------------------|---------------|--------|-------------|-----|-----------------------------------------|--------------|
| Chao et al. 2020 [1]               | USA       | mm     | CA | Mental health services                 | Migrants; elderly individuals                   | Mental disorder               | A             | I      | TG          | 14  | A&A1974                                 | DC; DA       |
| Due et al. 2020 [2]                | Australia | ql     | CA | Oral health services                   | Migrants                                        | No specific disease           | A             | I      | TG, HP      | 26  | R-BMHSU1995                             | Theo; DC; DA |
| Isaak et al. 2020 [3]              | Canada    | ql     | GT | Mental health services                 | Racial and ethnic minorities                    | Mental disorder               | A             | I, FG  | TG          | 115 | BMHSU, R-BMHSU1995, A&N1973, A&D&B 2013 | Theo; DA     |
| Shewamene et al. 2020 [4]          | Australia | mm     | CA | Complementary and alternative medicine | Women; migrants                                 | Maternal and perinatal health | A             | I      | TG          | 15  | BMHSU                                   | Theo         |
| Travers et al. 2020 [5]            | USA       | ql     | CA | Long-term care                         | Elderly individuals                             | No specific disease           | A             | I      | TG          | 470 | Ex-BMPF2002                             | Theo; DA     |
| Bascur-Castillo et al. 2019 [6]    | Chile     | ql     | P  | Urologic disease treatment             | Women                                           | Urologic diseases             | A             | I      | TG          | 10  | R-BMHSU1995                             | Theo; DA     |
| Briones-Vozmediano et al. 2019 [7] | Spain     | ql     | CA | General health care                    | Migrants                                        | Violence experience           | A             | I      | HP          | 28  | A&A1974                                 | DA           |
| Coleman 2019 [8]                   | USA       | ql     | P  | Mental health services                 | Migrants; men; individuals with mental disorder | Mental disorder               | D             | I      | TG          | 66  | BMHSU, R-BMHSU1995, A&N1973             | Theo         |
| Fleury et al. 2019 [9]             | Canada    | mm     | -  | Mental health services                 | Individuals with mental disorder                | Mental disorder               | A             | I      | TG          | 328 | R-BMHSU1995                             | Theo; DC; DA |
| Green et al. 2019 [10]             | USA       | ql     | CA | General health care                    | Men; individuals with HIV                       | HIV                           | A             | I      | TG          | 10  | BMHSU, R-BMHSU1995                      | DA           |
| Heidari et al. [11]                | Iran      | ql     | CA | Medication use                         | Individuals with arthritis                      | Arthritis                     | A             | I      | HP          | 47  | BMHSU2008                               | DC; DA       |
| Koche et al. 2019 [12]             | Nigeria   | ql     | -  | General health care                    | General population                              | No specific disease           | A             | I      | TG          | 24  | R-BMHSU1995, A&A1974, A&D2001, A&N2005  | DA           |
| Navarro-Millan et al. 2019 [13]    | UK        | ql     | -  | E-health                               | Individuals with specific disease               | Rheumatoid arthritis          | A             | FG     | TG          | 31  | A&N1973                                 | DC; DA       |
| Opoku et al. 2019 [14]             | Ghana     | ql     | CA | E-health                               | Individuals with non-communicable disease       | Non-communicable disease      | A             | I      | HP          | 13  | mhealth PNE                             | DA           |
| Perry et al. 2019 [15]             | USA       | ql     | TA | Preventive services                    | Individuals with low socio-economic status      | No specific disease           | A             | FG     | TG          | 235 | A&A1974                                 | Theo; DC; DA |
| Roberson et al. 2019 [16]          | USA       | ql     | GT | Natal care                             | Women; migrants, pregnant women                 | Maternal and perinatal health | A             | I      | TG          | 12  | R-BMHSU1995                             | Theo; DC     |
| Robinson et al. 2019 [17]          | UK        | ql     | FA | Oral health services                   | General population                              | Oral diseases                 | A             | FG; I  | TG, HP      | 34  | A&D1997                                 | DA           |

|                            |                 |    |      |                            |                                                        |                     |   |       |        |     |                    |              |
|----------------------------|-----------------|----|------|----------------------------|--------------------------------------------------------|---------------------|---|-------|--------|-----|--------------------|--------------|
| Schatz et al. 2019 [18]    | Uganda          | ql | CA   | STD treatment              | Individuals living in rural areas; elderly individuals | HIV                 | A | I     | TG, HP | 40  | R-BMHSU1995        | DA           |
| Gill et al. 2018 [19]      | UK              | ql | P    | Urologic disease treatment | Individuals with specific disease                      | Urologic diseases   | A | I     | TG     | 12  | R-BMHSU1995        | DA           |
| Grodensky et al. 2018 [20] | USA             | ql | TA   | Health insurance           | Men; individuals with incarceration                    | No specific disease | A | I     | TG     | 20  | BMVP2007           | Theo; DC; DA |
| Ko et al. 2018 [21]        | USA             | ql | CA   | Preventive services        | Women; mothers                                         | Viral Hepatitis     | A | FG    | TG     | 30  | R-BMHSU1995        | DC; DA       |
| Lor et al. 2018 [22]       | USA             | ql | -    | Screening                  | Migrants; women                                        | No specific disease | A | FG    | TG     | 58  | BMVP2000           | DA           |
| Mago et al. 2018 [23]      | Canada          | ql | P, E | Dental care                | Homeless                                               | No specific disease | A | I     | TG     | 25  | BMVP2000           | Theo; DA     |
| Riang'a et al. 2018 [24]   | Kenya           | mm | -    | Natal care                 | (Pregnant) Women; individuals living in rural areas    | No specific disease | A | I     | TG, HP | 64  | A&N1973            | DA           |
| Victor et al. 2018 [25]    | UK              | ql | CA   | General health care        | Elderly individuals; residents in care homes           | No specific disease | A | I     | TG     | 35  | A&N1973            | DC; DA       |
| Bayuo 2017 [26]            | Ghana           | ql | CA   | Outpatient care            | Elderly individuals                                    | No specific disease | A | I     | TG     | 16  | R-BMHSU1995        | Theo; DA     |
| Hawk et al. 2017 [27]      | USA             | ql | CA   | STD treatment              | Individuals with specific disease                      | HIV                 | A | I     | TG, HP | 40  | R-BMHSU1995        | Theo; DC; DA |
| Herrmann et al. 2017 [28]  | Norway; Germany | ql | GT   | General health care        | General population                                     | No specific disease | A | I; O  | TG     | 40  | R-BMHSU1995        | Theo         |
| Lee 2017 [29]              | USA             | mm | GT   | Screening                  | Migrants, women                                        | cancer              | D | I     | TG     | 30  | R-BMHSU1995        | Theo         |
| Levison et al. 2017 [30]   | USA             | ql | E    | STD treatment              | Migrants                                               | HIV                 | A | I     | TG, HP | 51  | BMVP2000           | DC           |
| Parkman et al. 2017 [31]   | UK              | ql | I    | Emergency department       | Individuals with specific disease                      | Addiction           | A | I     | TG     | 30  | R-BMHSU1995, BMHSU | Theo; DA     |
| Rice 2017 [32]             | USA             | ql | P    | Health insurance           | Individuals with incarceration                         | No specific disease | D | I     | TG     | 11  | BMVP2000           | Theo; DC     |
| Rodriguez et al. 2017 [33] | USA             | ql | -    | STD treatment              | Individuals living in rural areas                      | HIV                 | A | I     | HP     | 36  | A&D2001            | DA           |
| Tewari et al. 2017 [34]    | India           | mm | GT   | Mental health care         | Individuals living in rural areas                      | Mental disorders    | A | FG; I | HP     | 78  | R-BMHSU1995        | DA           |
| Velez et al. 2017 [35]     | USA             | ql | GT   | Dental care                | Migrants; women                                        | No specific disease | A | FG    | TG, HP | 103 | BMVP2000           | Theo; DA     |
| White 2017 [36]            | USA             | ql |      | Preventive services        | Men; migrants; young individuals                       | Cancer; CD          | D | I     | TG     | 12  | R-BMHSU1995        | Theo; DA     |
| Henson et al. 2016 [37]    | UK              | ql | CA   | Emergency department       | Individuals with specific disease                      | Cancer              | A | I     | TG, NK | 24  | A&N1973            | Theo; DC; DA |

|                                  |           |    |     |                                                 |                                   |                     |   |       |            |     |                                   |              |
|----------------------------------|-----------|----|-----|-------------------------------------------------|-----------------------------------|---------------------|---|-------|------------|-----|-----------------------------------|--------------|
| Kohno et al. 2016 [38]           | Malaysia  | ql | CA  | General health care                             | Migrants; elderly individuals     | No specific disease | A | FG; I | TG         | 38  | R-BMHSU1995                       | Theo; DA     |
| Maulik et al. 2016 [39]          | India     | mm | TA  | Mental health care                              | Individuals living in rural areas | Mental disorders    | A | FG; I | TG, HP     | 31  | R-BMHSU1995                       | DA           |
| Mukasa 2016 [40]                 | USA       | ql | P   | Natal care                                      | Migrants; women; mothers          | No specific disease | D | I     | TG         | 11  | R-BMHSU1995                       | Theo; DA     |
| Obikunle 2016 [41]               | USA       | ql | P   | Prevention, Screening                           | Women; migrants                   | Cancer              | D | I     | TG         | 14  | R-BMHSU1995                       | Theo; DA     |
| Rachlis et al. 2016 [42]         | Kenya     | ql | -   | Chronic care                                    | Individuals with specific disease | HIV; TB; CD         | A | FG; I | TG, HP, NK | 207 | A&N1973                           | DA           |
| Rachlis et al. 2016 [43]         | Kenya     | ql | CA  | Chronic care                                    | Individuals with specific disease | HIV; TB; CD         | A | FG; I | TG, HP     | 235 | A&N1973                           | DA           |
| Sperber et al. 2016 [44]         | USA       | ql | CA  | Cancer care, health insurance, genomic services | Veterans                          | Cancer              | A | I     | HP         | 58  | Ex-BMPF2002, UM1998               | DC; DA       |
| Thiessen et al. 2016 [45]        | Canada    | ql | CA  | Natal care                                      | (H)P                              | No specific disease | A | I     | HP         | 24  | A&A1974                           | DC; DA       |
| Blanas et al. 2015 [46]          | USA       | ql | GT  | Screening                                       | Migrants                          | Viral Hepatitis     | A | FG    | TG         | 39  | BMVP2000                          | Theo; DC; DA |
| Bradbury-Jones et al. 2015a [47] | UK        | mm | TA  | Natal care                                      | Women                             | No specific disease | A | FG    | HP         | 45  | Ex-BMPF2002, A&D2001              | Theo; DA     |
| Bradbury-Jones et al. 2015b [48] | Scotland  | ql | R&S | Natal care                                      | Women; victims of violence        | No specific disease | A | I     | TG         | 5   | R-BMHSU1995, Ex-BMPF2002, A&D2001 | Theo; DA     |
| Coe et al. 2015 [49]             | USA       | ql | CA  | Medication use                                  | Homeless                          | No specific disease | A | DocA  | TG         | 426 | BMVP2000                          | Theo         |
| Condellius et al. 2015 [50]      | Sweden    | ql | CA  | General health care                             | Elderly individuals               | No specific disease | A | I     | NK         | 14  | A&A1974                           | Theo; DC; DA |
| Conner et al. 2015 [51]          | USA       | ql | P   | End-of-life care                                | Informal caregivers; (H)P         | No specific disease | A | FG    | TG, HP     | 53  | R-BMHSU1995                       | Theo         |
| Holtzman et al. 2015 [52]        | USA       | ql | GT  | STD treatment                                   | Individuals with specific disease | HIV                 | A | I     | TG         | 51  | R-BMHSU1995                       | Theo; DA     |
| Nowgesic 2015 [53]               | Canada    | ql | E   | STD treatment                                   | Indigenous people                 | HIV                 | D | I; O  | TG, HP     | 41  | BMHSU2008                         | DC; DA       |
| Porteous et al. 2015 [54]        | Scotland  | ql | TA  | Self-care                                       | Individuals with specific disease | No specific disease | A | I     | TG         | 24  | R-BMHSU1995, BMHSU2008            | Theo; DC; DA |
| Richards 2015 [55]               | Grenada   | ql | P   | Screening                                       | Women                             | Cancer              | D | I     | TG         | 8   | BMHSU2008                         | Theo; DC; DA |
| Cathers 2014 [56]                | USA       | ql | P   | Outpatient care                                 | (Health) professionals            | Addiction           | D | I     | TG         | 5   | BMVP2000                          | Theo; DA     |
| Serna 2014 [57]                  | USA       | mm | CA  | Dental care                                     | Migrants                          | Oral diseases       | D | I     | TG         | 14  | R-BMHSU1995, BMHSU                | Theo; DC     |
| Artuso et al. 2013[58]           | Australia | ql | TCM | General health care                             | Migrants                          | CD                  | A | FG; I | TG, HP, NK | 21  | R-BMHSU1995                       | Theo         |

|                           |             |    |     |                          |                                                     |                     |   |       |            |     |                                      |              |
|---------------------------|-------------|----|-----|--------------------------|-----------------------------------------------------|---------------------|---|-------|------------|-----|--------------------------------------|--------------|
| Doshi et al. 2013 [59]    | USA         | ql | GT  | Screening                | Men; migrants                                       | HIV                 | A | I     | TG         | 78  | R-BMHSU1995                          | DC; DA       |
| Han et al. 2013 [60]      | USA         | ql | GT  | Prevention, Screening    | Individuals with specific disease                   | Viral Hepatitis     | A | I     | HP         | 20  | A&A1974                              | Theo; DC; DA |
| Majaj et al. 2013 [61]    | Palestine   | ql | -   | General health care      | Women; individuals living in rural areas            | No specific disease | A | I     | TG, HP     | 37  | R-BMHSU1995                          | DC; DA       |
| Noh 2013 [62]             | USA         | ql | CA  | End-of-life-care         | Elderly individuals; migrants                       | No specific disease | A | I     | TG         | 28  | BMVP2000                             | Theo; DC; DA |
| Scott 2013 [63]           | USA         | mm | CA  | Cancer care              | Migrants                                            | Cancer              | D | FG; I | TG, HP, NK | 29  | BMVP2000                             | Theo         |
| Boateng et al. 2012 [64]  | Netherlands | ql | CA  | General health care      | Migrants                                            | No specific disease | A | FG    | TG         | 51  | R-BMHSU1995                          | DC; DA       |
| Callahan 2012 [65]        | USA         | mm | CA  | Cancer care              | Individuals with specific disease                   | Cancer              | D | I     | TG         | 7   | BMVP2000                             | Theo         |
| Dergal 2012 [66]          | Canada      | mm | GT  | Nursing                  | Caregivers                                          | No specific disease | D | I     | TG         | 10  | A&N1973                              | Theo; DA     |
| Chiu 2011 [67]            | USA         | ql | E   | General health care      | Migrants, elderly individuals                       | No specific disease | D | I     | TG         | 18  | R-BMHSU1995                          | Theo; DC     |
| Corboy et al. 2011 [68]   | Australia   | mm | A&S | Mental health care       | Men; individuals living in rural areas              | Cancer              | A | I     | TG, HP     | 12  | R-BMHSU1995                          | DA           |
| Goh 2011 [69]             | Singapore   | mm | P   | Post-acute care services | Elderly individuals                                 | No specific disease | A | I     | TG, HP, NK | 29  | R-BMHSU1995, A&N1973, A&A1974, BMHSU | DA           |
| Chiu 2010 [70]            | USA         | ql | E   | E-health                 | Migrants; caregivers                                | Dementia            | D | I     | TG         | 14  | R-BMHSU1995, A&N1973                 | Theo; DC     |
| Gräßel et al. 2010 [71]   | Germany     | mm | CA  | Caregiver counselling    | Informal caregiver                                  | No specific disease | A | Q     | NK         | 306 | A&N1973                              | Theo; DC; DA |
| Rööst et al. 2009 [72]    | Bolivia     | ql | AI  | Natal care               | Women; survivors of a severe pregnancy complication | No specific disease | A | I     | TG         | 30  | R-BMHSU1995                          | Theo         |
| Andrasik et al. 2008 [73] | USA         | ql | CA  | Screening                | Women; individuals with low socio-economic status   | HIV                 | A | I     | TG         | 35  | R-BMHSU1995                          | Theo; DA     |
| Butler et al. 2008 [74]   | USA         | ql | -   | General health care      | Women; individuals living in rural area             | No specific disease | A | I     | TG         | 8   | R-BMHSU1995                          | Theo; DA     |
| Herrera et al. 2008 [75]  | USA         | mm | -   | Longterm care            | Migrants                                            | No specific disease | A | I     | NK         | 66  | R-BMHSU1995                          | Theo; DC; DA |
| Bradley et al. 2002 [76]  | USA         | ql | GT  | Longterm care            | Women; migrants; elderly individuals                | Mental disorders    | A | FG    | TG         | 96  | R-BMHSU1995                          | Theo         |
| Go et al. 2002 [77]       | Vietnam     | ql | -   | STD treatment            | Women                                               | STD                 | A | I     | TG         | 36  | R-BMHSU1995                          | DC; DA       |

Country – UK: United Kingdom, USA: United States of America

Methods – mm: mixed-method study; q: qualitative study

Methodological orientation: CA: Content analysis; E: Ethnography; GT: Ground Theory; P: Phenomenology; I: Iterative Categorisation; TA: Thematic analysis; AI: Analytic induction; A&S: Coding & Analysis Auerbach & Silverstein; TCM: Miles and Huberman's conceptual matrix (TCM); R&S: Framework analysis of Ritchie and Spencer; FA: Framework analysis

Disease of interest – TB: tuberculosis; STD: Sexually transmitted diseases

Data collection – I: Interview, FG: Focus group, O: Observation, DocA: Document analysis, Q: Questionnaire

Respondents – TG: target group, HP: Health professionals, NK: next of kin

Document type – A: Article, D: Dissertation

Model – BMHSU: Andersen 1968 [78]; A&N1973: Andersen and Newman's Framework of Viewing Health Services Utilization [79]; A&A1974: Aday and Andersen's Framework for the study of access to medical care [80]; R-BMHSU1995: Andersen 1995 [81]; A&D1997: Ethnicity, aging, and oral health outcomes: a conceptual framework [82]; UM1998: Phillips, Morrison, Andersen & Aday – Utilization Model [83]; BMVP2000: Behavioral Model for Vulnerable Populations [84]; A&D2001: Behavioral Model of Health Services Use including contextual and individual characteristics [85]; Ex-BMPF2002: expanded Andersen model with psychosocial factors in Long-Term Care [76]; A&N2005: Andersen & Newman Individual Determinants of Health Service Utilization; BMVP2007: Stein, Andersen & Gelberg [86]; BMHSU2008 Andersen 2008 [87]; A&D&B 2013: A behavioral model of health services use including contextual and individual characteristics [88]; mhealth PNE framework [89]

Theo: Theoretical background, DC: Data collection, DA: Data analysis

## REFERENCES

- 1 Chao Y.-Y., Seo J.Y., Katigbak C., et al. Utilization of Mental Health Services Among Older Chinese Immigrants in New York City. *Community Ment Health J* 2020.
- 2 Due C., Aldam I., Ziersch A. Understanding oral health help-seeking among Middle Eastern refugees and asylum seekers in Australia: An exploratory study. *Community Dent Oral Epidemiol* 2020.
- 3 Isaak C.A., Mota N., Medved M., et al. Conceptualizations of help-seeking for mental health concerns in First Nations communities in Canada: A comparison of fit with the Andersen Behavioral Model. *Transcult Psychiatry* 2020. <http://tps.sagepub.com/content/by/year>.
- 4 Shewamene Z, Dune T, Smith CA. Use of traditional and complementary medicine for maternal health and wellbeing by African migrant women in Australia: a mixed method study. *BMC Complement Med Ther* 2020;20(1):60.
- 5 Travers J.L., Hirschman K.B., Naylor M.D. Adapting Andersen's expanded behavioral model of health services use to include older adults receiving long-term services and supports. *BMC Geriatr* 2020;20(1):58.
- 6 Bascur-Castillo C, Araneda-Gatica V, Castro-Arias H, et al. Determinants in the process of seeking help for urinary incontinence in the Chilean health system. *Int J Gynaecol Obstet* 2019;144(1):103–11.
- 7 Briones-Vozmediano E., Castellanos-Torres E., Goicolea I., et al. Challenges to Detecting and Addressing Intimate Partner Violence Among Roma Women in Spain: Perspectives of Primary Care Providers. *J Interpers Violence* 2019;886260519872299.
- 8 Coleman TM. Help-seeking experiences of African American men with depression 2019.
- 9 Fleury M.-J., Grenier G., Farand L., et al. Reasons for Emergency Department Use among Patients with Mental Disorders. *Psychiatr Q* 2019;90(4):703–16. <http://www.wkap.nl/journalhome.htm/0033-2720>.
- 10 Green D.C., Wheeler E.M. A Qualitative Exploration of Facilitators for Health Service Use among Aging Gay Men Living with HIV. *J. Int. Assoc. Providers AIDS Care* 2019;18. <http://jia.sagepub.com/content/by/year>.
- 11 Heidari P., Cross W., Weller C., et al. Rheumatologists' insight into medication adherence in patients with rheumatoid arthritis: A qualitative study. *Int. J. Rheum. Dis.* 2019;22(9):1695–705. [http://onlinelibrary.wiley.com/journal/10.1111/\(ISSN\)1756-185X](http://onlinelibrary.wiley.com/journal/10.1111/(ISSN)1756-185X).
- 12 Koce F, Randhawa G, Ochieng B. Understanding healthcare self-referral in Nigeria from the service users' perspective: a qualitative study of Niger state. *BMC Health Serv Res* 2019;19(1):209.

- 13 Navarro-Millan I, Zinski A, Shurbaji S, et al. Perspectives of Rheumatoid Arthritis Patients on Electronic Communication and Patient-Reported Outcome Data Collection: A Qualitative Study. *Arthritis Care and Research* 2019;71(1):80–87.
- 14 Opoku D, Busse R, Quentin W. Achieving Sustainability and Scale-Up of Mobile Health Noncommunicable Disease Interventions in Sub-Saharan Africa: Views of Policy Makers in Ghana. *JMIR Mhealth Uhealth* 2019;7(5):e11497.
- 15 Perry R, Gard Read J, Chandler C, et al. Understanding Participants' Perceptions of Access to and Satisfaction With Chronic Disease Prevention Programs. *Health Educ Behav* 2019;1090198118822710.
- 16 Roberson M.C. Refusal of epidural anesthesia for labor pain management by African American parturients: An examination of factors. *AANA J.* 2019;87(4):299–304. <https://www.aana.com/publications/aana-journal>.
- 17 Robinson P.G., Douglas G.V.A., Gibson B.J., et al. Remuneration of primary dental care in England: A qualitative framework analysis of perspectives of a new service delivery model incorporating incentives for improved access, quality and health outcomes. *BMJ Open* 2019;9(10):e031886. <http://bmjopen.bmj.com/content/early/by/section>.
- 18 Schatz E, Seeley J, Negin J, et al. "For us here, we remind ourselves": strategies and barriers to ART access and adherence among older Ugandans. *BMC Public Health* 2019;19(1):131.
- 19 Gill P, Logan K, John B, et al. Participants' experiences of ketamine bladder syndrome: A qualitative study. *International Journal of Nursing* 2018;12(2/3):76–83. <http://www.redibw.de/db/ebsco.php/search.ebscohost.com/login.aspx%3fdirect%3dtrue%26db%3dcin20%26AN%3d132481296%26site%3dehost-live>.
- 20 Grodensky CA, Rosen DL, Blue CM, et al. Medicaid Enrollment among Prison Inmates in a Non-expansion State: Exploring Predisposing, Enabling, and Need Factors Related to Enrollment Pre-incarceration and Post-Release. *Journal of urban health: bulletin of the New York Academy of Medicine* 2018;95(4):454–66.
- 21 Ko LK, Taylor VM, Mohamed FB, et al. "We brought our culture here with us": A qualitative study of perceptions of HPV vaccine and vaccine uptake among East African immigrant mothers. *Papillomavirus Res* 2018;7:21–25.
- 22 Lor B, Ornelas IJ, Magarati M, et al. We Should Know Ourselves: Burmese and Bhutanese Refugee Women's Perspectives on Cervical Cancer Screening. *J Health Care Poor Underserved* 2018;29(3):881–97.
- 23 Mago A, MacEntee MI, Brondani M, et al. Anxiety and anger of homeless people coping with dental care. *Community Dent Oral Epidemiol* 2018;46(3):225–30.
- 24 Riang'a RM, Nangulu AK, Broerse JEW. "I should have started earlier, but I was not feeling ill!" Perceptions of Kalenjin women on antenatal care and its implications on initial access and differentials in patterns of antenatal care utilization in rural Uasin Gishu County Kenya. *PLoS ONE* 2018;13(10):e0202895.
- 25 Victor C, Davies S, Dickinson A, et al. "It just happens". Care home residents' experiences and expectations of accessing GP care. *Arch Gerontol Geriatr* 2018;79:97–103.
- 26 Bayuo J. Experiences with out-patient hospital service utilisation among older persons in the Asante Akyem North District- Ghana. *BMC Health Serv Res* 2017;17(1):652.
- 27 Hawk M, Coulter RWS, Egan JE, et al. Exploring the Healthcare Environment and Associations with Clinical Outcomes of People Living with HIV/AIDS. *AIDS Patient Care STDS* 2017;31(12):495–503.
- 28 Herrmann WJ, Haarmann A, Bærheim A. A sequential model for the structure of health care utilization. *PLoS ONE* 2017;12(5):e0176657.
- 29 Lee MH. Breast cancer screening behavior in Korean immigrant women in the United States 2017.
- 30 Levison JH, Bogart LM, Khan IF, et al. "Where It Falls Apart": Barriers to Retention in HIV Care in Latino Immigrants and Migrants. *AIDS Patient Care STDS* 2017;31(9):394–405.
- 31 Parkman T, Neale J, Day E, et al. Qualitative exploration of why people repeatedly attend emergency departments for alcohol-related reasons. *BMC Health Serv Res* 2017;17(1):140.
- 32 Rice MB. Attitudes of women offenders towards medicaid enrollment and coverage under the Affordable Care Act 2017.
- 33 Rodriguez HR, Dobalian A. Provider and Administrator Experiences With Providing HIV Treatment and Prevention Services in Rural Areas. *AIDS Educ Prev* 2017;29(1):77–91.
- 34 Tewari A, Kallakuri S, Devarapalli S, et al. Process evaluation of the systematic medical appraisal, referral and treatment (SMART) mental health project in rural India. *BMC Psychiatry* 2017;17(1):385.
- 35 Velez D, Palomo-Zervas A, Nunez-Alvarez A, et al. Facilitators and Barriers to Dental Care Among Mexican Migrant Women and Their Families in North San Diego County. *J Immigr Minor Health* 2017;19(5):1216–26.

- 36 White AW. The role of social and cultural factors on preventive health service use among young, rural, African American men: A narrative inquiry 2017.
- 37 Henson LA, Higginson IJ, Daveson BA, et al. 'I'll be in a safe place': a qualitative study of the decisions taken by people with advanced cancer to seek emergency department care. *BMJ Open* 2016;6(11).  
<http://gateway.webofknowledge.com/gateway/Gateway.cgi?GWVersion=2&SrcAuth=SwissAcademicSoftware&SrcApp=Citavi&DestLinkType=FullRecord&DestApp=WOS&KeyUT=000391303400076>.
- 38 Kohno A, Nik Farid ND, Musa G, et al. Factors affecting Japanese retirees' healthcare service utilisation in Malaysia: a qualitative study. *BMJ Open* 2016;6(3):e010668.
- 39 Maulik PK, Tewari A, Devarapalli S, et al. The Systematic Medical Appraisal, Referral and Treatment (SMART) Mental Health Project: Development and Testing of Electronic Decision Support System and Formative Research to Understand Perceptions about Mental Health in Rural India. *PLoS ONE* 2016;11(10):e0164404.
- 40 Mukasa B. Maternal and child health access disparities among recent African immigrants in the United States 2016.
- 41 Obikunle AF. Barriers to breast cancer prevention and screening among African American women 2016.
- 42 Rachlis B, Naanyu V, Wachira J, et al. Community Perceptions of Community Health Workers (CHWs) and Their Roles in Management for HIV, Tuberculosis and Hypertension in Western Kenya. *PLoS ONE* 2016;11(2):e0149412.
- 43 Rachlis B, Naanyu V, Wachira J, et al. Identifying common barriers and facilitators to linkage and retention in chronic disease care in western Kenya. *BMC Public Health* 2016;16:741.
- 44 Sperber NR, Andrews SM, Voils CI, et al. Barriers and Facilitators to Adoption of Genomic Services for Colorectal Care within the Veterans Health Administration. *J Pers Med* 2016;6(2).
- 45 Thiessen K, Heaman M, Mignone J, et al. Barriers and facilitators related to implementation of regulated midwifery in Manitoba: a case study. *BMC Health Serv Res* 2016;16:1–22.  
<http://www.redi-bw.de/db/ebSCO.php/search.ebscohost.com/login.aspx%3fdirect%3dtrue%26db%3dcin20%26AN%3d113906425%26site%3dehost-live>.
- 46 Blanas DA, Nichols K, Bekele M, et al. Adapting the Andersen model to a francophone West African immigrant population: hepatitis B screening and linkage to care in New York City. *J Community Health* 2015;40(1):175–84.
- 47 Bradbury-Jones C, Breckenridge JP, Devaney J, et al. Priorities and strategies for improving disabled women's access to maternity services when they are affected by domestic abuse: a multi-method study using concept maps. *BMC Pregnancy Childbirth* 2015;15:350.
- 48 Bradbury-Jones C, Breckenridge JP, Devaney J, et al. Disabled women's experiences of accessing and utilising maternity services when they are affected by domestic abuse: a critical incident technique study. *BMC Pregnancy Childbirth* 2015;15:181.
- 49 Coe AB, Moczygomba LR, Gatewood SBS, et al. Medication adherence challenges among patients experiencing homelessness in a behavioral health clinic. *Res Social Adm Pharm* 2015;11(3):e110–20.
- 50 Condelius A, Andersson M. Exploring access to care among older people in the last phase of life using the behavioural model of health services use: a qualitative study from the perspective of the next of kin of older persons who had died in a nursing home. *BMC Geriatr* 2015;15:138.
- 51 Conner NE, Chase SK. Decisions and caregiving: End of life among Blacks from the perspective of informal caregivers and decision makers. *Am J Hosp Palliat Care* 2015;32(4):454–63.  
<http://www.redi-bw.de/db/ebSCO.php/search.ebscohost.com/login.aspx%3fdirect%3dtrue%26db%3dpsyh%26AN%3d2015-21262-013%26site%3dehost-live>.
- 52 Holtzman CW, Shea JA, Glanz K, et al. Mapping patient-identified barriers and facilitators to retention in HIV care and antiretroviral therapy adherence to Andersen's Behavioral Model. *AIDS Care* 2015;27(7):817–28.
- 53 Nowgesic EF. Antiretroviral Therapy Access, Acceptance and Adherence among Urban Indigenous Peoples Living with HIV in Saskatchewan: The Indigenous Red Ribbon Storytelling Study 2015.
- 54 Porteous T, Wyke S, Hannaford P, et al. Self-care behaviour for minor symptoms: can Andersen's Behavioral Model of Health Services Use help us to understand it? *Int J Pharm Pract* 2015;23(1):27–35.
- 55 Richards C. Women's experiences with the follow-up system for cervical cancer in a developing country. 76 2015.

- 56 Cathers LA. Exploring substance use disorders community outpatient counselors' experiences treating clients with co-occurring medical conditions: An interpretative phenomenological analysis 2014.
- 57 Serma CA. Exploring oral health problems in adult hispanic migrant farmworkers: A mixed-methods approach 2014.
- 58 Artuso S, Cargo M, Brown A, et al. Factors influencing health care utilisation among Aboriginal cardiac patients in central Australia: a qualitative study. *BMC Health Serv Res* 2013;13:83.
- 59 Doshi RK, Malebranche D, Bowleg L, et al. Health care and HIV testing experiences among Black men in the South: implications for "Seek, Test, Treat, and Retain" HIV prevention strategies. *AIDS Patient Care STDS* 2013;27(2):123–33.
- 60 Han H, Perumalswami P, Kleinman L, et al. Voices of multi-ethnic providers in NYC: Health care for viral hepatitis. *Hepatology* 2013;Conference 64th Annual Meeting of the American Association for the Study of Liver Diseases The Liver Meeting 2013. Washington, DC United States. Conference Publication:1195A-1196A. <http://ovidsp.ovid.com/ovidweb.cgi?T=JS&CSC=Y&NEWS=N&PAGE=fulltext&D=emed14&AN=71238042>.
- 61 Majaj L, Nassar M, Allegri M. "It's not easy to acknowledge that I'm ill": a qualitative investigation into the health seeking behavior of rural Palestinian women. *BMC Womens Health* 2013;13. <http://gateway.webofknowledge.com/gateway/Gateway.cgi?GWVersion=2&SrcAuth=SwissAcademicSoftware&SrcApp=Citavi&DestLinkType=FullRecord&DestApp=WOS&KeyUT=000320055000001>.
- 62 Noh H. Terminally ill Black elders: Making the choice to receive hospice care 2013.
- 63 Scott KL. Delay to treatment for Latinos diagnosed with lung and head-and-neck cancers: Application of the behavioral model for vulnerable populations 2013.
- 64 Boateng L, Nicolaou M, Dijkshoorn H, et al. An exploration of the enablers and barriers in access to the Dutch healthcare system among Ghanaians in Amsterdam. *BMC Health Serv Res* 2012;12:75.
- 65 Callahan CC. Cancer, vulnerability, and financial quality of life: A mixed methods study 2012.
- 66 Dergal J. Family members' use of private companions in nursing homes: A mixed methods study 2012.
- 67 Chiu MWY. Psychosocial responses to falling in older Chinese immigrants living in the community 2011.
- 68 Corbo D, McDonald J, McLaren S. Barriers to accessing psychosocial support services among men with cancer living in rural Australia: Perceptions of men and health professionals. *Int J Mens Health* 2011;10(2):163–83. <http://www.redi-bw.de/db/ebSCO.php/search.ebscohost.com/login.aspx%3fdirect%3dtrue%26db%3dpsych%26AN%3d2011-21872-004%26site%3dehost-live>.
- 69 Goh SN. Post Acute Care of the Elderly in Singapore What Factors Influence Use of Services? *Asia Pacific Journal of Social Work and Development* 2011;21(1):31–53. <http://gateway.webofknowledge.com/gateway/Gateway.cgi?GWVersion=2&SrcAuth=SwissAcademicSoftware&SrcApp=Citavi&DestLinkType=FullRecord&DestApp=WOS&KeyUT=000292427400004>.
- 70 Chiu TML. Usage and Non-usage Behaviour of eHealth Services Among Chinese Canadians Caring for a Family Member with Dementia 2008.
- 71 Gräbel E, Luttenberger K, Trilling A, et al. Counselling for dementia caregivers-predictors for utilization and expected quality from a family caregiver's point of view. *Eur J Ageing* 2010;7(2):111–19.
- 72 Rööst M, Jonsson C, Liljestrand J, et al. Social differentiation and embodied dispositions: a qualitative study of maternal care-seeking behaviour for near-miss morbidity in Bolivia. *Reprod Health* 2009;6:13.
- 73 Andrasik MP, Rose R, Pereira D, et al. Barriers to cervical cancer screening among low-income HIV-positive African American women. *J Health Care Poor Underserved* 2008;19(3):912–25.
- 74 Butler C, Kim-Godwin Y, Fox JA. Exploration of health care concerns of Hispanic women in a rural southeastern North Carolina community. *Online Journal of Rural Nursing and Health Care* 2008;8(2):22–32.
- 75 Herrera AP, Lee J, Palos G, et al. Cultural influences in the patterns of long-term care use among Mexican American family caregivers. *J Appl Gerontol* 2008;27(2):141–65. <http://www.redi-bw.de/db/ebSCO.php/search.ebscohost.com/login.aspx%3fdirect%3dtrue%26db%3dpsych%26AN%3d2008-03902-002%26site%3dehost-live>.
- 76 Bradley EH, McGraw SA, Curry L, et al. Expanding the Andersen model: the role of psychosocial factors in long-term care use. *Health Services Research* 2002;37(5):1221–42.
- 77 Go VF-I, Quan VM, Chung A, et al. Gender gaps, gender traps: sexual identity and vulnerability to sexually transmitted diseases among women in Vietnam. *Soc Sci Med* 2002;55(3):467–81.



- 78 Andersen R. A behavioral model of families' use of health services. Chicago, Ill.: Univ. of Chicago 1968.
- 79 Andersen R, Newman JF. Societal and individual determinants of medical care utilization in the United States. *Milbank Mem Fund Q Health Soc* 1973;51(1):95–124.
- 80 Aday LA, Andersen R. A framework for the study of access to medical care. *Health Services Research* 1974;9(3):208–20.
- 81 Andersen RM. Revisiting the Behavioral Model and Access to Medical Care: Does it Matter? *J Health Soc Behav* 1995;36(1):1–10.
- 82 Andersen RM, Davidson PL. Ethnicity, aging, and oral health outcomes: a conceptual framework. *Adv Dent Res* 1997;11(2):203–09.
- 83 Phillips KA, Morrison KR, Andersen R, et al. Understanding the context of healthcare utilization: assessing environmental and provider-related variables in the behavioral model of utilization. *Health Services Research* 1998;33(3):571–96.
- 84 Gelberg L, Andersen RM, Leake B. The Behavioral Model for Vulnerable Populations: Application to Medical Care Use and Outcomes for Homeless People. *Health Services Research* 2000;34(6) (accessed 13 Sep 2018).
- 85 Andersen RM, Davidson PL. Improving access to care in America. In: Andersen R, Kominski GF, Rice TH, eds. *Changing the US health care system: Key issues in health services, policy, and management*, 2nd edn. San Francisco: Jossey-Bass 2001:3–31.
- 86 Stein JA, Andersen R, Gelberg L. Applying the Gelberg-Andersen behavioral model for vulnerable populations to health services utilization in homeless women. *J Health Psychol* 2007;12(5):791–804.
- 87 Andersen RM. National Health Surveys and the Behavioral Model of Health Services Use. *Med Care* 2008;46(7):647–53.
- 88 Andersen RM, Davidson PL, Baumeister SE. Improving Acces to Care. In: Kominski GF, ed. *Changing the U.S. health care system: Key issues in health services policy and management*, 4th edn. San Francisco, California: Jossey-Bass 2013:33–69.
- 89 Opoku D, Scott P, Quentin W. Healthcare Professionals' Perceptions of the Benefits and Challenges of a Teleconsultation Service in the Amansie-West District of Ghana. *Telemedicine journal and e-health the official journal of the American Telemedicine Association* 2015;21(9):748–55.
